# Supplementary material for: Effect of UV-absorbing small molecule dyes with different alkyl chain densities and branching positions on the photovoltaic performance of semitransparent DSSCs
Source: Royal Society of Chemistry journal article supplement (doi:10.1039/d4nj03868a), 2024-01-01
Supplement: d4nj03868a1.pdf [file d4nj03868a1.pdf]

*Electronic Supplementary Information*

**Effect of UV-absorbing small molecule dyes with different alkyl  
chain densities and branching positions on semitransparent DSSCs**

Yongliang Liu, Shengbo Zhu\*, Xiao Song, Wei Li, Xiao Yang, Xiaoling Niu,  
Hongwei Zhou\*, Wenzhi Zhang, Weixing Chen

Shaanxi Key Laboratory of Photoelectric Functional Materials and Devices;  
Engineering Research Center of Light Stabilizers for Polymer Materials, Universities  
of Shaanxi Province; School of Materials and Chemical Engineering, Xi'an  
Technological University, Xi'an 710021, China

**Corresponding Authors**

(1) Shengbo Zhu

E-mail: zhushengbo@xatu.edu.cn

(2) Hongwei Zhou

E-mail: xatuzhou@163.com

## 1. Synthesis of intermediates and characterizations

1.1. All chemicals and solvents were purchased commercially and used without further purification unless otherwise stated.  $^1\text{H}$  NMR and  $^{13}\text{C}$  NMR spectra were recorded on Bruker AVANCE-600 MHz instruments with tetramethylsilane (TMS) as the internal standard. High resolution mass spectra (HRMS) were measured with a Bruker maXis mass spectrometer. Gas Chromatograph-Mass Spectrometer (GC-MS) were measured with a Thermo DSQ II.

1.2. The synthetic routes of **4OPC**, **6OPC**, **6OP6C**, **2C6OPC** and **8OPC** are shown in Scheme S1.

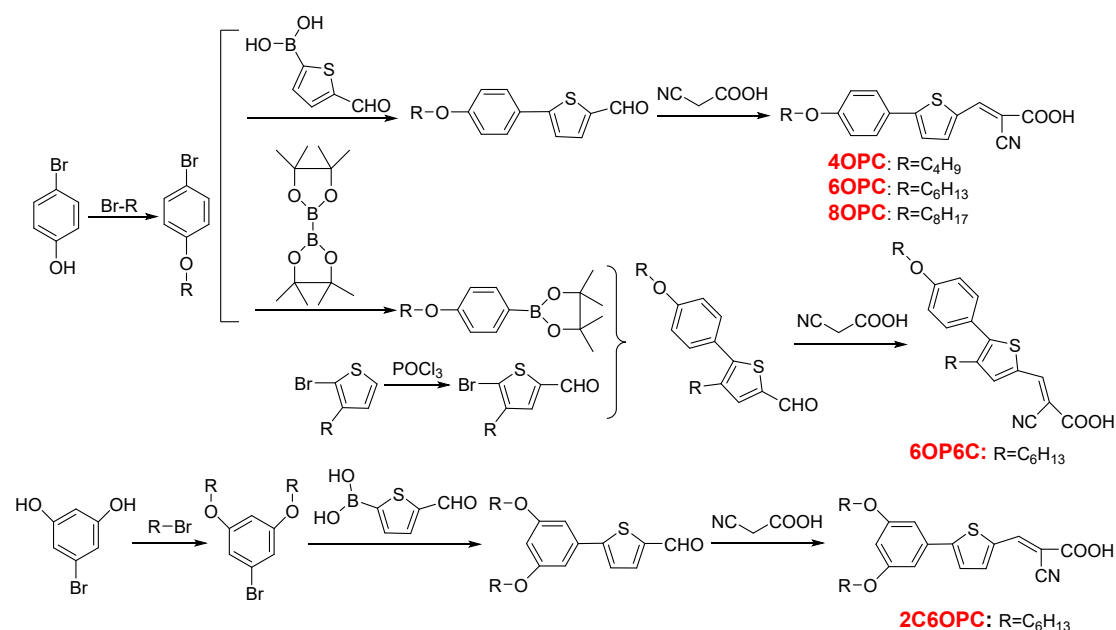

**Scheme S1.** Synthetic routes of **4OPC**, **6OPC**, **6OP6C**, **2C6OPC** and **8OPC**.

1.3 The synthetic details are described as follows:

*1-bromo-4-butoxybenzene.* In a 150 mL 3-necked flask, p-bromophenol (2.50 g, 14.5 mmol), 1-bromobutane (1.78 g, 13.0 mmol), K<sub>2</sub>CO<sub>3</sub> (3.99 g, 28.9 mmol), and *N,N*-dimethylformamide (DMF) (50 mL) were added in turn. Following this, the reaction mixture was stirred for 12 h at 60°C. After cooling to room temperature, the reaction mixture was poured into dichloromethane (DCM) (200 mL). The combined organic layers were acidified with dilute hydrochloric acid solution and then washed with water. After removing the solvent, the crude product obtained was purified by column chromatography (PE) to obtain solid (2.90 g, yield 87%). GC-MS (EI, *m/z*) calcd. For (C<sub>10</sub>H<sub>13</sub>BrO): 228, found: 228.1 (M<sup>+</sup>).

*5-(4-butoxyphenyl)thiophene-2-carbaldehyde*. In a 150 mL 3-necked flask, 1-bromo-4-butoxybenzene (1.50 g, 6.55 mmol), 5-aldehyde-2-thiophene boronic acid (2.04 g, 13.1 mmol), tetrabutylammonium bromide (TBAB) (1.06 g, 3.27 mmol), Pd(amphos)Cl<sub>2</sub> (92.71 mg, 130.94 μmol), dimethyl formamide (DMF) (30 mL), and NaF (1.10 g, 26.2 mmol, 5 mL) aqueous solution were added in turn. Following this, the reaction mixture was stirred at 75 °C for 5 h and then poured into DCM (200 mL). The organic layer was washed with water. After removing the solvent, the crude product obtained was purified by column chromatography (DCM/PE=1/4, v/v) to obtain white solid (0.59 g, yield 39%). <sup>1</sup>H NMR (600 MHz, CDCl<sub>3</sub>) δ 9.85 (s, 1H), 7.70 (d, J = 3.9 Hz, 1H), 7.59 (d, J = 8.8 Hz, 2H), 7.28 (d, J = 3.9 Hz, 1H), 6.93 (d, J = 8.8 Hz, 2H), 4.00 (t, J = 6.5 Hz, 2H), 1.81 – 1.76 (m, 2H), 1.54 – 1.47 (m, 2H), 0.99 (t, J = 7.4 Hz, 3H). <sup>13</sup>C NMR (150 MHz, CDCl<sub>3</sub>) δ 182.61, 160.38, 154.69, 141.47, 137.66, 127.79, 125.56, 122.91, 115.13, 67.93, 31.22, 19.23, 13.83. GC-MS (EI, *m/z*) calcd. For (C<sub>15</sub>H<sub>16</sub>O<sub>2</sub>S): 260.087, found: 260.02 (M<sup>+</sup>).

*(E)-3-(5-(4-butoxyphenyl)thiophen-2-yl)-2-cyanoacrylic acid (4OPC)*. In a 150 mL 3-necked flask, compound 5-(4-butoxyphenyl)thiophene-2-carbaldehyde (0.40 g, 1.54 mmol), acetic acid (30 mL), cyanoacetic acid (0.40 g, 4.61 mmol) and ammonium acetate (0.35 g, 4.61 mmol) were added in turn under a nitrogen atmosphere. The reaction mixture was refluxed for 5 h. After cooling to room temperature, the mixture was poured into ice water. The precipitate was filtered, washed by distilled water, and purified by column chromatography (PE/DCM=1/4, v/v) to give a yellow solid (0.21 g, 42% yield). <sup>1</sup>H NMR (600 MHz, DMSO-*d*<sub>6</sub>) δ 8.47 (s, 1H), 7.98 (d, J = 4.0 Hz, 1H), 7.71 (d, J = 8.7 Hz, 2H), 7.64 (d, J = 4.0 Hz, 1H), 7.03 (d, J = 8.8 Hz, 2H), 4.02 (t, J = 6.5 Hz, 2H), 1.74 – 1.69 (m, 2H), 1.48 – 1.41 (m, 2H), 0.94 (t, J = 7.4 Hz, 3H). <sup>13</sup>C NMR (150 MHz, DMSO-*d*<sub>6</sub>) δ 164.21, 160.48, 153.84, 147.17, 142.11, 133.97, 128.23, 125.23, 124.38, 117.03, 115.78, 97.86, 67.93, 31.13, 19.17, 14.14. HRMS (ESI, *m/z*): [M+H]<sup>+</sup> calcd. for (C<sub>18</sub>H<sub>17</sub>NO<sub>3</sub>S): 327.0929, found: 328.0816.

*5-(4-(hexyloxy)phenyl)thiophene-2-carbaldehyde*. In a 150 mL 3-necked flask, 1-bromo-4-(hexyloxy)benzen (1.0 g, 3.9 mmol), 5-aldehyde-2-thiophene boronic acid (0.91 g, 5.8 mmol), TBAB (0.63 g, 1.9 mmol), Pd(amphos)Cl<sub>2</sub> (55 mg, 78 μmol), DMF (40 mL), and NaF (1.10 g, 26.2 mmol, 5 mL) aqueous solution were added in turn. Following this, the reaction mixture was stirred at 75 °C for 5 h and then poured into DCM (200 mL). The organic layer was washed with water. After removing the

solvent, the crude product obtained was purified by column chromatography (DCM/PE=3/2, v/v) to obtain white solid (0.30 g, yield 27%). <sup>1</sup>H NMR (600 MHz, CDCl<sub>3</sub>) δ 9.85 (s, 1H), 7.70 (d, J = 3.9 Hz, 1H), 7.59 (d, J = 8.8 Hz, 2H), 7.28 (d, J = 3.9 Hz, 1H), 6.93 (d, J = 8.8 Hz, 2H), 3.99 (t, J = 6.6 Hz, 2H), 1.82 – 1.77 (m, 2H), 1.49 – 1.44 (m, 2H), 1.36 – 1.33 (m, 4H), 0.91 (t, J = 7.1 Hz, 3H). <sup>13</sup>C NMR (150 MHz, CDCl<sub>3</sub>) δ 182.61, 160.38, 154.70, 141.46, 137.67, 127.79, 125.56, 122.90, 115.13, 68.26, 31.57, 29.15, 25.69, 22.60, 14.03. GC-MS (EI, *m/z*) calcd. For (C<sub>17</sub>H<sub>20</sub>O<sub>2</sub>S): 288.1, found: 288.3 (M<sup>+</sup>).

*(E)*-2-cyano-3-(5-(4-(hexyloxy)phenyl)thiophen-2-yl)acrylic acid (**6OPC**). In a 150 mL 3-necked flask, compound 5-(4-(hexyloxy)phenyl)thiophene-2-carbaldehyde (0.35 g, 1.2 mmol), acetic acid (30 mL), cyanoacetic acid (0.31 g, 3.6 mmol) and ammonium acetate (0.28 g, 3.6 mmol) were added in turn under a nitrogen atmosphere. The reaction mixture was refluxed for 5 h. After cooling to room temperature, the mixture was poured into ice water. The precipitate was filtered, washed by distilled water, and purified by column chromatography (DCM/PE=3/2, v/v) to give a yellow solid (0.26 g, 62% yield). <sup>1</sup>H NMR (600 MHz, DMSO-*d*<sub>6</sub>) δ 8.47 (s, 1H), 7.99 (d, J = 4.2 Hz, 1H), 7.72 (d, J = 8.8 Hz, 2H), 7.65 (d, J = 4.0 Hz, 1H), 7.04 (d, J = 8.9 Hz, 2H), 4.02 (t, J = 6.5 Hz, 2H), 1.76 – 1.70 (m, 2H), 1.44 – 1.40 (m, 2H), 1.34 – 1.28 (m, 4H), 0.88 (t, J = 7.1 Hz, 3H). <sup>13</sup>C NMR (150 MHz, DMSO-*d*<sub>6</sub>) δ 164.21, 160.49, 153.81, 147.18, 142.17, 133.97, 128.26, 125.24, 124.42, 117.05, 115.82, 97.92, 68.24, 31.45, 29.03, 25.61, 22.53, 14.37. HRMS (ESI, *m/z*): [M+H]<sup>+</sup> calcd. for (C<sub>20</sub>H<sub>21</sub>NO<sub>3</sub>S): 355.1242, found: 356.1160.

*5-(4-(octyloxy)phenyl)thiophene-2-carbaldehyde*. In a 150 mL 3-necked flask, 1-bromo-4-(octyloxy)benzene (1.10 g, 3.86 mmol), 5-aldehyde-2-thiophene boronic acid (1.50 g, 9.64 mmol), TBAB (0.622 g, 1.93 mmol), Pd(amphos)Cl<sub>2</sub> (54.6 mg, 77.2 μmol), DMF (30 mL), and NaF (0.81 g, 19.3 mmol, 5 mL) aqueous solution were added in turn. Following this, the reaction mixture was stirred at 70 °C for 4 h and then poured into DCM (200 mL). The organic layer was washed with water. After removing the solvent, the crude product obtained was purified by column chromatography (DCM/PE=1/2, v/v) to white-yellow crystals (0.34 g, yield 28%). <sup>1</sup>H NMR (600 MHz, CDCl<sub>3</sub>) δ 9.85 (s, 1H), 7.70 (d, J = 3.9 Hz, 1H), 7.59 (d, J = 8.8 Hz, 2H), 7.28 (d, J = 3.9 Hz, 1H), 6.93 (d, J = 8.8 Hz, 2H), 3.99 (t, J = 6.6 Hz, 2H), 1.82 – 1.77 (m, 2H), 1.49 – 1.44 (m, 2H), 1.37 – 1.26 (m, 8H), 0.89 (t, J = 7.0 Hz, 3H). <sup>13</sup>C

NMR (150 MHz, CDCl<sub>3</sub>)  $\delta$  182.61, 160.38, 154.70, 141.47, 137.66, 127.79, 125.56, 122.90, 115.13, 68.26, 31.82, 29.35, 29.24, 29.19, 26.02, 22.66, 14.10. GC-MS (EI, *m/z*) calcd. For (C<sub>19</sub>H<sub>24</sub>O<sub>2</sub>S): 316.1, found: 316.1 (M<sup>+</sup>).

*(E)*-2-cyano-3-(5-(4-(octyloxy)phenyl)thiophen-2-yl)acrylic acid (**8OPC**). In a 150 mL 3-necked flask, compound 5-(4-(octyloxy)phenyl)thiophene-2-carbaldehyde (0.28 g, 0.88 mmol), acetic acid (30 mL), cyanoacetic acid (0.23 g, 2.65 mmol) and ammonium acetate (0.21 g, 2.65 mmol) were added in turn under a nitrogen atmosphere. The reaction mixture was refluxed for 3 h. After cooling to room temperature, the mixture was poured into ice water. The precipitate was filtered, washed by distilled water, and purified by column chromatography (EA/PE=1/4, v/v) to give an orange-red solid (0.20 g, 59% yield). <sup>1</sup>H NMR (600 MHz, DMSO)  $\delta$  13.67 (s, 1H), 8.46 (s, 1H), 7.98 (d, J = 4.1 Hz, 1H), 7.69 (t, J = 8.6 Hz, 2H), 7.63 (d, J = 4.0 Hz, 1H), 7.01 (d, J = 8.8 Hz, 2H), 3.99 (t, J = 6.5 Hz, 2H), 1.77 – 1.61 (m, 2H), 1.42 – 1.34 (m, 2H), 1.26 (dd, J = 13.2, 6.9 Hz, 8H), 0.85 (t, J = 7.0 Hz, 3H). <sup>13</sup>C NMR (151 MHz, DMSO)  $\delta$  163.73 (s), 159.98 (s), 153.36 (s), 146.69 (s), 141.70 (s), 133.54 (s), 127.73 (s), 123.88 (s), 115.28 (s), 97.31 (s), 67.84 (s), 31.24 (s), 28.84 – 28.49 (m), 25.47 (s), 22.08 (s), 13.92 (s). HRMS (ESI, *m/z*): [M+H]<sup>+</sup> calcd. for (C<sub>22</sub>H<sub>25</sub>NO<sub>3</sub>S): 383.1555, found: 384.1486.

2-(4-(hexyloxy)phenyl)-4,4,5,5-tetramethyl-1,3,2-dioxaborolane. In a 150 mL 3-necked flask, 1-bromo-4-(hexyloxy)benzene (3.00 g, 11.7 mmol), 4,4,4',4',5,5,5',5'-octamethyl-2,2'-bi(1,3,2-dioxaborolane) (4.44 g, 17.5 mmol), CH<sub>3</sub>COOK (5.72 g, 58.3 mmol), Pd(amphos)Cl<sub>2</sub> (0.426 g, 584  $\mu$ mol), and dioxane (30 mL) were added in turn. Following this, the reaction mixture was stirred for 8 h at 85°C, and then poured into DCM. The organic layer was washed with water and dried over anhydrous MgSO<sub>4</sub>. After removing the solvent, the crude product obtained was purified through column chromatography (DCM/PE = 1/15, v/v) to give a pale yellow liquid (2.8 g, 78.9% yield).

5-bromo-4-hexylthiophene-2-carbaldehyde. In a 150 mL 3-necked flask, a solution of DMF (1.77 g, 24.3 mmol) in dry 1,2-dichloroethane (15 mL) was cooled to 0 °C under a nitrogen atmosphere. Following this, POCl<sub>3</sub> (1.86 g, 12.1 mmol) was added dropwise with stirring. When all the POCl<sub>3</sub> had been added, and the heat of the reaction had subsided, a solution of 2-bromo-3-hexylthiophene (2.00 g, 8.09 mmol) in 1,2-dichloroethane (15 mL) was added dropwise. The reaction mixture was stirred for

5 h at 80 °C and then poured into cold saturated solution of sodium bicarbonate (200 mL) and extracted with DCM. The organic layer was washed with water and dried over anhydrous MgSO<sub>4</sub>. After removing the solvent, the crude product obtained was purified by column chromatography (PE/EA = 50/1, v/v) to give a light yellow liquid (0.87 g, 39% yield).

*4-hexyl-5-(4-(hexyloxy)phenyl)thiophene-2-carbaldehyde*. In a 150 mL 3-necked flask, *2-(4-(hexyloxy)phenyl)-4,4,5,5-tetramethyl-1,3,2-dioxaborolane* (0.90g, 2.96 mmol), *5-bromo-4-hexylthiophene-2-carbaldehyde* (0.740g, 2.69 mmol), TBAB (0.433g, 1.34 mmol), Pd(amphos)Cl<sub>2</sub> (38.1mg, 53.8 umol), DMF (30 mL), and NaF (0.34 g, 8.1 mmol, 5 mL) aqueous solution were added in turn. Following this, the reaction mixture was stirred at 70 °C for 5 h and then poured into DCM (200 mL). The organic layer was washed with water. After removing the solvent, the crude product obtained was purified by column chromatography (EA/PE=1/25, v/v) to light green liquid (0.44 g, yield 44%). <sup>1</sup>H NMR (600 MHz, CDCl<sub>3</sub>) δ 9.67 (s, 1H), 7.47 (s, 1H), 7.21 (d, J = 8.6 Hz, 2H), 6.80 (d, J = 8.6 Hz, 2H), 3.84 (t, J = 6.5 Hz, 2H), 2.51 – 2.45 (m, 2H), 1.68 – 1.60 (m, 2H), 1.48 – 1.40 (m, 2H), 1.23 – 1.05 (m, 12H), 0.73 (dt, J = 31.7, 6.9 Hz, 7H). <sup>13</sup>C NMR (151 MHz, CDCl<sub>3</sub>) δ 182.95 (s), 159.77 (s), 149.09 (s), 140.64 (s), 139.91 (s), 138.77 (s), 130.47 (s), 125.74 (s), 114.91 (s), 68.27 (s), 31.65 (s), 30.79 (s), 29.29 (s), 28.74 (s), 25.83 (s), 22.71 (s), 14.13 (s). GC-MS (EI, *m/z*) calcd. For (C<sub>23</sub>H<sub>32</sub>O<sub>2</sub>S): 372.2, found: 372.4 (M<sup>+</sup>).

*(E)-2-cyano-3-(4-hexyl-5-(4-(hexyloxy)phenyl)thiophen-2-yl)acrylic acid*. (**6OP6C**). In a 150 mL 3-necked flask, compound *4-hexyl-5-(4-(hexyloxy)phenyl)thiophene-2-carbaldehyde* (0.30 g, 0.81 mmol), acetic acid (30 mL), cyanoacetic acid (0.21 g, 2.4 mmol) and ammonium acetate (0.19 g, 2.4 mmol) were added in turn under a nitrogen atmosphere. The reaction mixture was refluxed for 3 h. After cooling to room temperature, the mixture was poured into ice water. The precipitate was filtered, washed by distilled water, and purified by column chromatography (EA/PE=1/6, v/v) to give an orange solid (0.29 g, 82% yield). <sup>1</sup>H NMR (600 MHz, DMSO) δ 13.71 (s, 1H), 8.42 (s, 1H), 7.91 (s, 1H), 7.41 (t, J = 8.5 Hz, 2H), 7.04 (d, J = 8.5 Hz, 2H), 4.00 (t, J = 5.8 Hz, 2H), 1.74 – 1.68 (m, 2H), 1.56 – 1.49 (m, 2H), 1.43 – 1.37 (m, 2H), 1.30 (d, J = 3.5 Hz, 5H), 1.21 (dd, J = 13.2, 6.8 Hz, 7H), 0.84 (dt, J = 39.0, 6.8 Hz, 7H). <sup>13</sup>C NMR (151 MHz, DMSO) δ 158.91 (s), 147.50 (s), 139.31 (s), 130.11 – 129.97 (m), 116.09 (s), 114.82 (s), 97.79 (s), 67.58 (s), 30.64 (d, J = 14.5 Hz), 29.47

(s), 28.28 (s), 28.02 (s), 27.37 (s), 24.87 (s), 21.72 (d,  $J = 15.9$  Hz), 13.57 (s). HRMS (ESI,  $m/z$ ):  $[M+H]^+$  calcd. for ( $C_{22}H_{25}NO_3S$ ): 439.2181, found: 443.2245.

*1-bromo-3,5-bis(hexyloxy)benzene*. In a 150 mL 3-necked flask, 5-bromobenzene-1,3-diol (2.00 g, 10.58 mmol), 1-bromohexane (5.24 g, 31.74 mmol),  $K_2CO_3$  (7.31 g, 52.91 mmol), and DMF (30 mL) were added in turn. Following this, the reaction mixture was stirred for 12 h at 60°C. After cooling to room temperature, the reaction mixture was poured into dichloromethane (DCM) (200 mL). The combined organic layers were acidified with dilute hydrochloric acid solution and then washed with water. After removing the solvent, the crude product obtained was purified by column chromatography (PE) to yellow liquid (2.95 g, yield 78%). GC-MS (EI,  $m/z$ ) calcd. For ( $C_{18}H_{29}BrO_2$ ): 356.1, found: 356.1 ( $M^+$ ).

*5-(3,5-bis(hexyloxy)phenyl)thiophene-2-carbaldehyde*. In a 150 mL 3-necked flask, 1-bromo-3,5-bis(hexyloxy)benzene (1.5 g, 4.2 mmol), 5-aldehyde-2-thiophene boronic acid (1.3 g, 8.4 mmol), tetrabutylammonium bromide (TBAB) (0.68 g, 2.1 mmol), Pd(amphos) $Cl_2$  (60 mg, 84  $\mu$ mol), dimethyl formamide (DMF) (30 mL), and NaF (0.88 g, 21 mmol, 5 mL) aqueous solution were added in turn. Following this, the reaction mixture was stirred at 75 °C for 6 h and then poured into DCM (200 mL). The organic layer was washed with water. After removing the solvent, the crude product obtained was purified by column chromatography (EA/PE=1/8, v/v) to reddish brown liquid (0.75 g, yield 46%).  $^1H$  NMR (600 MHz,  $CDCl_3$ )  $\delta$  9.77 (s, 1H), 7.61 (s, 1H), 7.26 (s, 1H), 6.67 (s, 2H), 6.38 (s, 1H), 3.87 (t,  $J = 6.1$  Hz, 5H), 1.70 – 1.66 (m, 4H), 1.24 (s, 12H), -0.04 (s, 6H).  $^{13}C$  NMR (151 MHz,  $CDCl_3$ )  $\delta$  182.46 – 182.33 (m), 160.47 (s), 142.12 (s), 134.42 (s), 105.00 (s), 68.07 (s), 31.50 (s), 28.88 (s), 25.53 (s), 22.44 (s), 13.92 (s). GC-MS (EI,  $m/z$ ) calcd. For ( $C_{23}H_{32}O_3S$ ): 388.2, found: 388.1 ( $M^+$ ).

*(E)-3-(5-(3,5-bis(hexyloxy)phenyl)thiophen-2-yl)-2-cyanoacrylic acid. (2C6OPC)*. In a 150 mL 3-necked flask, compound 5-(3,5-bis(hexyloxy)phenyl)thiophene-2-carbaldehyde (0.50 g, 1.29 mmol), acetic acid (30 mL), cyanoacetic acid (0.328 g, 3.86 mmol) and ammonium acetate (0.29 g, 3.86 mmol) were added in turn under a nitrogen atmosphere. The reaction mixture was refluxed for 5 h. After cooling to room temperature, the mixture was poured into ice water. The precipitate was filtered, washed by distilled water, and purified by column chromatography (EA/PE =1/1, v/v) to give a yellow solid (0.3 g, 52% yield).  $^1H$  NMR (600 MHz, DMSO)  $\delta$  13.79 (s,

10H), 8.47 (s, 17H), 7.98 (s, 15H), 7.97 – 7.92 (m, 3H), 7.86 (d, J = 4.0 Hz, 3H), 7.77 (s, 18H), 7.68 (s, 3H), 6.83 (d, J = 7.7 Hz, 41H), 6.54 (s, 21H), 3.99 (s, 85H), 3.34 (s, 14H), 2.53 – 2.47 (m, 36H), 1.77 – 1.61 (m, 85H), 1.40 (d, J = 6.6 Hz, 66H), 1.35 (dd, J = 61.8, 5.0 Hz, 264H), 0.87 (t, J = 6.8 Hz, 128H), 0.87 (t, J = 6.8 Hz, 131H), 0.87 (t, J = 6.8 Hz, 129H), 0.77 (d, J = 6.6 Hz, 3H), -0.01 (s, 6H). <sup>13</sup>C NMR (151 MHz, DMSO) δ 163.54 (s), 160.46 (s), 146.61 – 146.48 (m), 141.13 (s), 125.95 – 125.81 (m), 116.40 – 116.27 (m), 105.01 (s), 101.96 (s), 98.53 (s), 67.84 (s), 31.00 (s), 28.61 (s), 25.17 (s), 22.06 (s), 13.88 (s). HRMS (ESI, m/z): [M+H]<sup>+</sup> calcd. for (C<sub>26</sub>H<sub>33</sub>NO<sub>4</sub>S): 455.2130, found: 459.2195.



## 2. Molecular structure confirmation

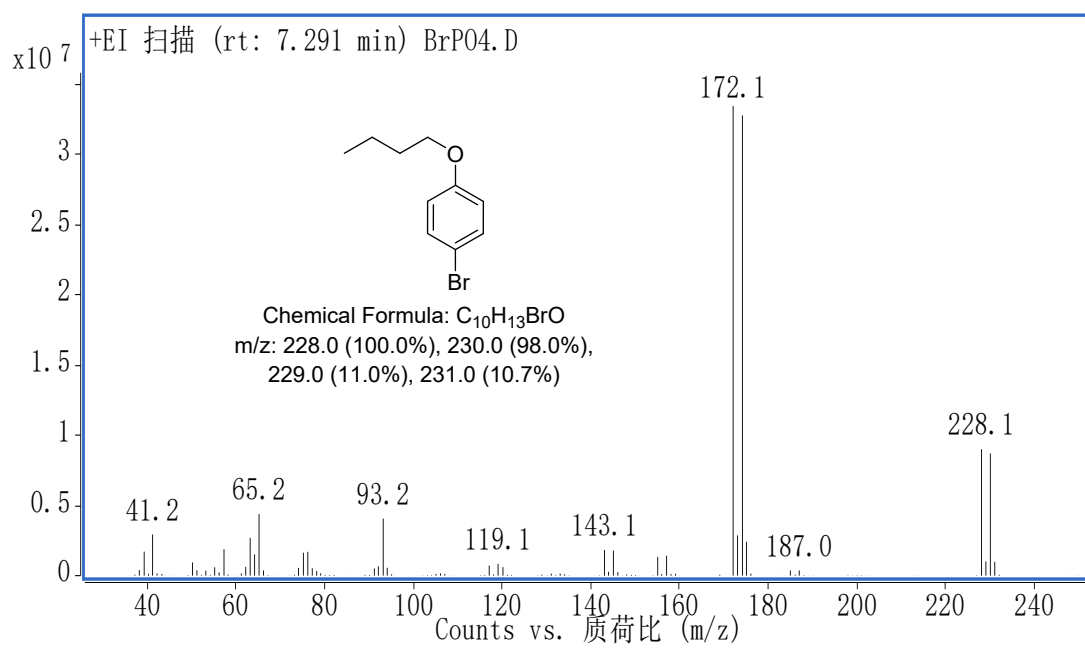

**Fig. S1.** GC-MS of compound 1-bromo-4-butoxybenzene.

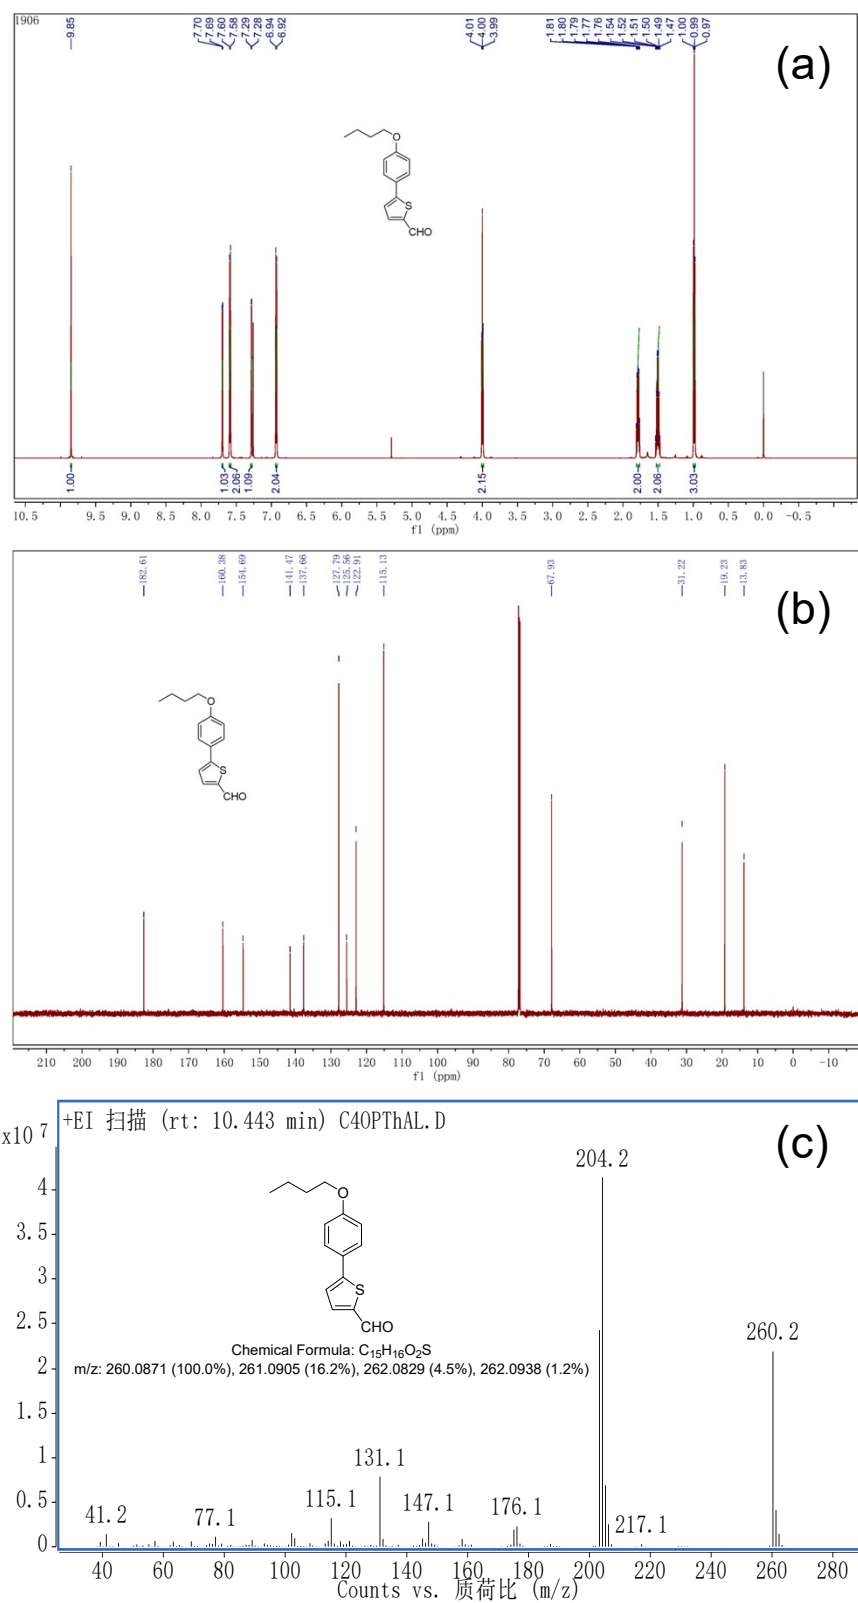

**Fig. S2.** (a)  $^1\text{H}$  NMR, (b)  $^{13}\text{C}$  NMR, and (c) GCMS of compound 5-(4-butoxyphenyl)thiophene-2-carbaldehyde.



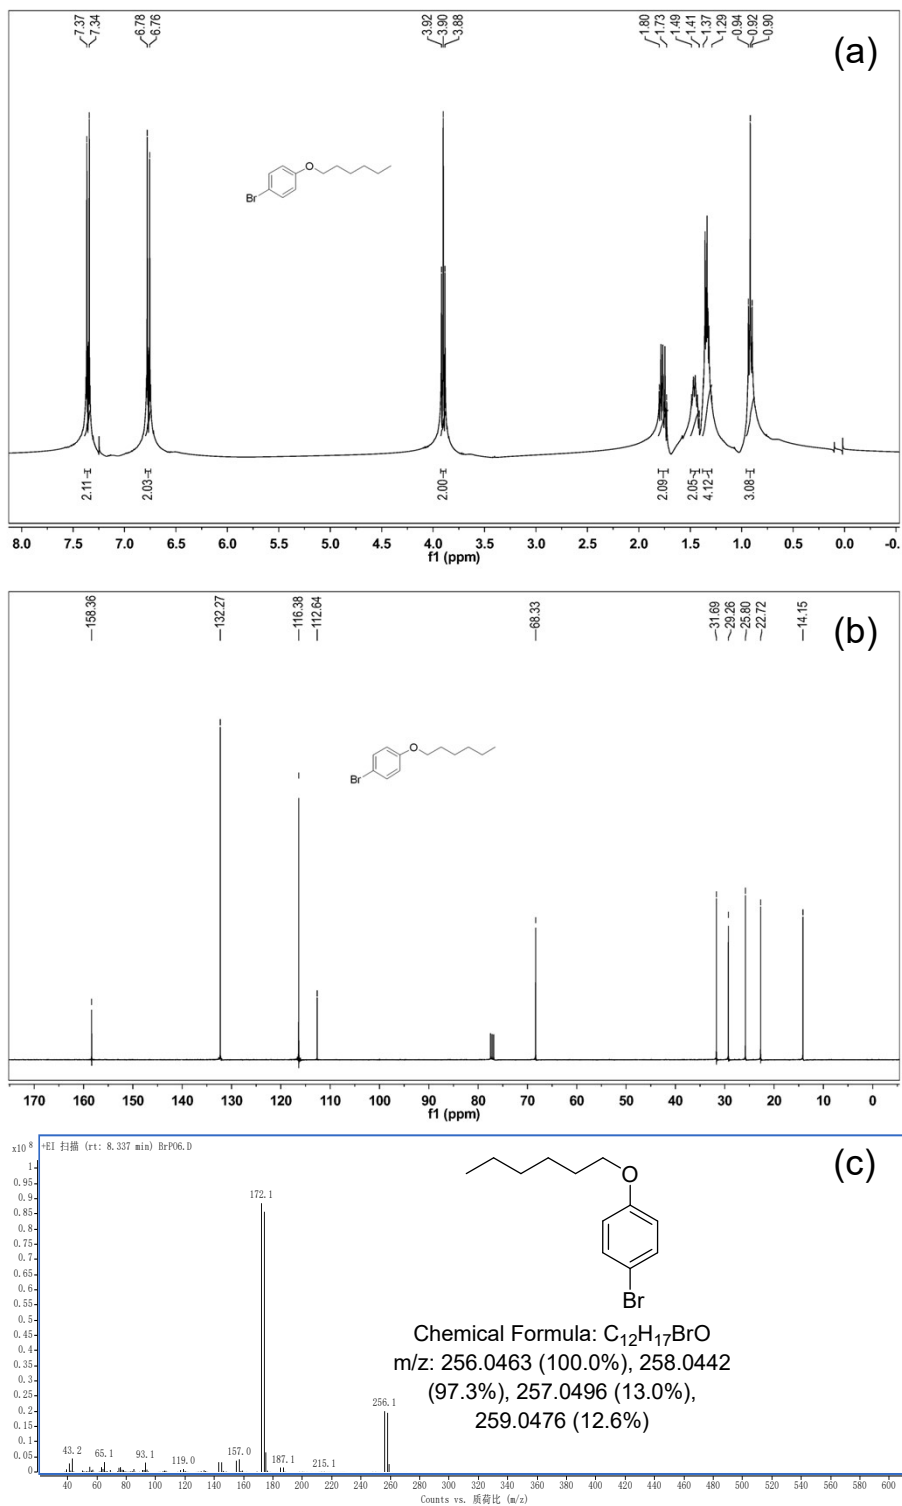

**Fig. S4.** (a)  $^1\text{H}$  NMR, (b)  $^{13}\text{C}$  NMR, and (c) GCMS of compound 5-(4-(hexyloxy)phenyl)thiophene-2-carbaldehyde.

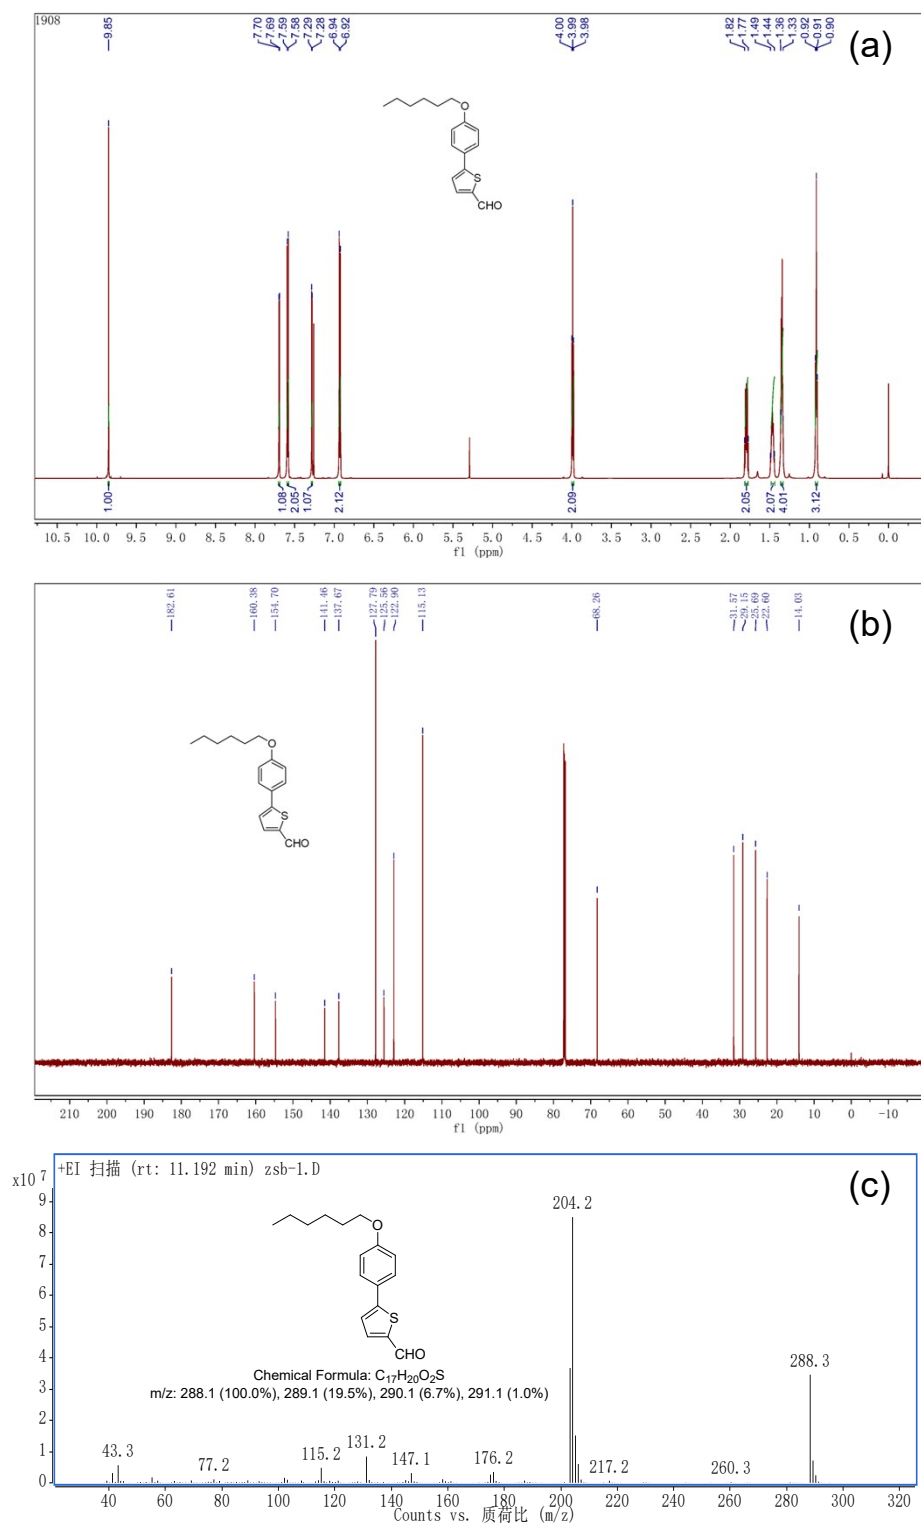

**Fig. S5.** (a)  $^1\text{H}$  NMR, (b)  $^{13}\text{C}$  NMR, and (c) GCMS of compound 5-(4-(hexyloxy)phenyl)thiophene-2-carbaldehyde.

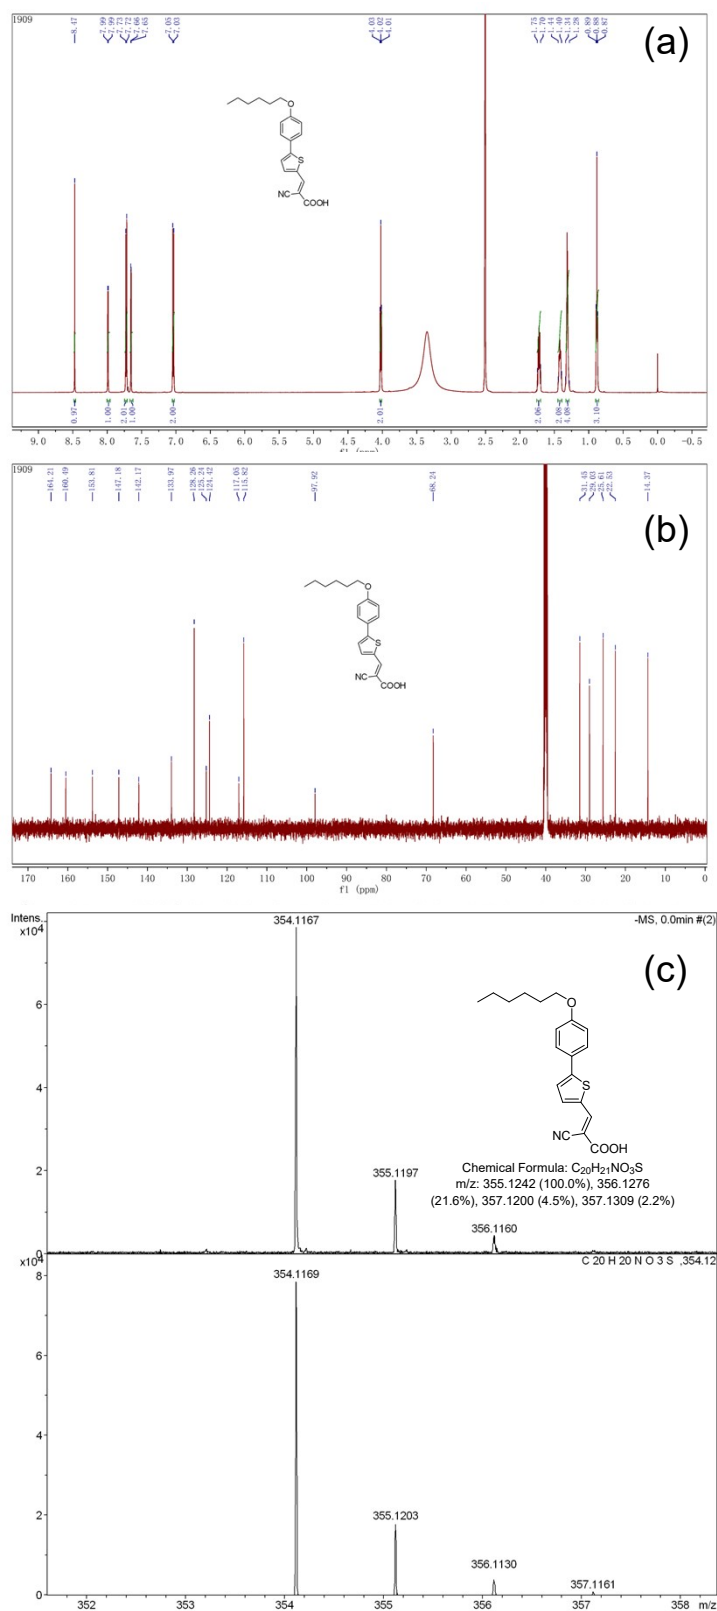

**Fig. S6.** (a)  $^1\text{H}$  NMR, (b)  $^{13}\text{C}$  NMR, and (c) HRMS of compound (E)-2-cyano-3-(5-(4-(hexyloxy)phenyl)thiophen-2-yl)acrylic acid.

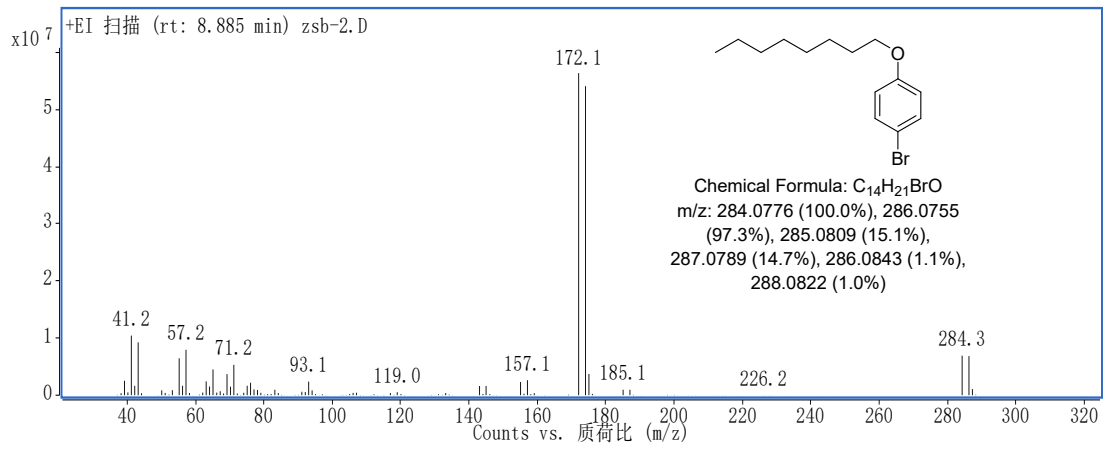

**Fig. S7.** GCMS of compound 1-bromo-4-(octyloxy)benzene.

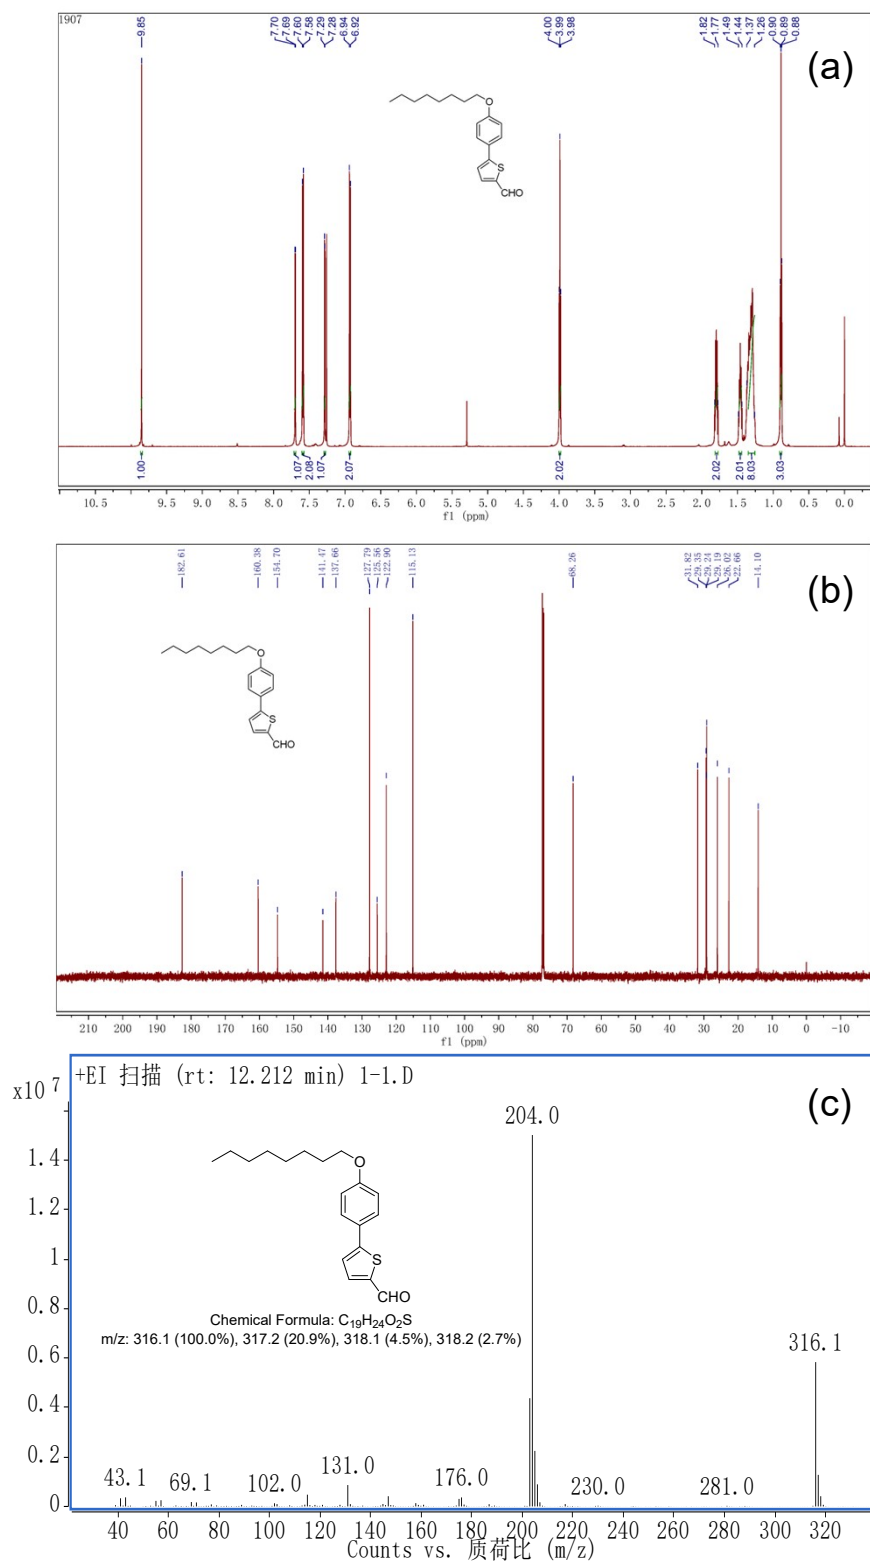

**Fig. S8.** (a)  $^1\text{H}$  NMR, (b)  $^{13}\text{C}$  NMR, and (c) GCMS of compound 5-(4-(octyloxy)phenyl)thiophene-2-carbaldehyde.



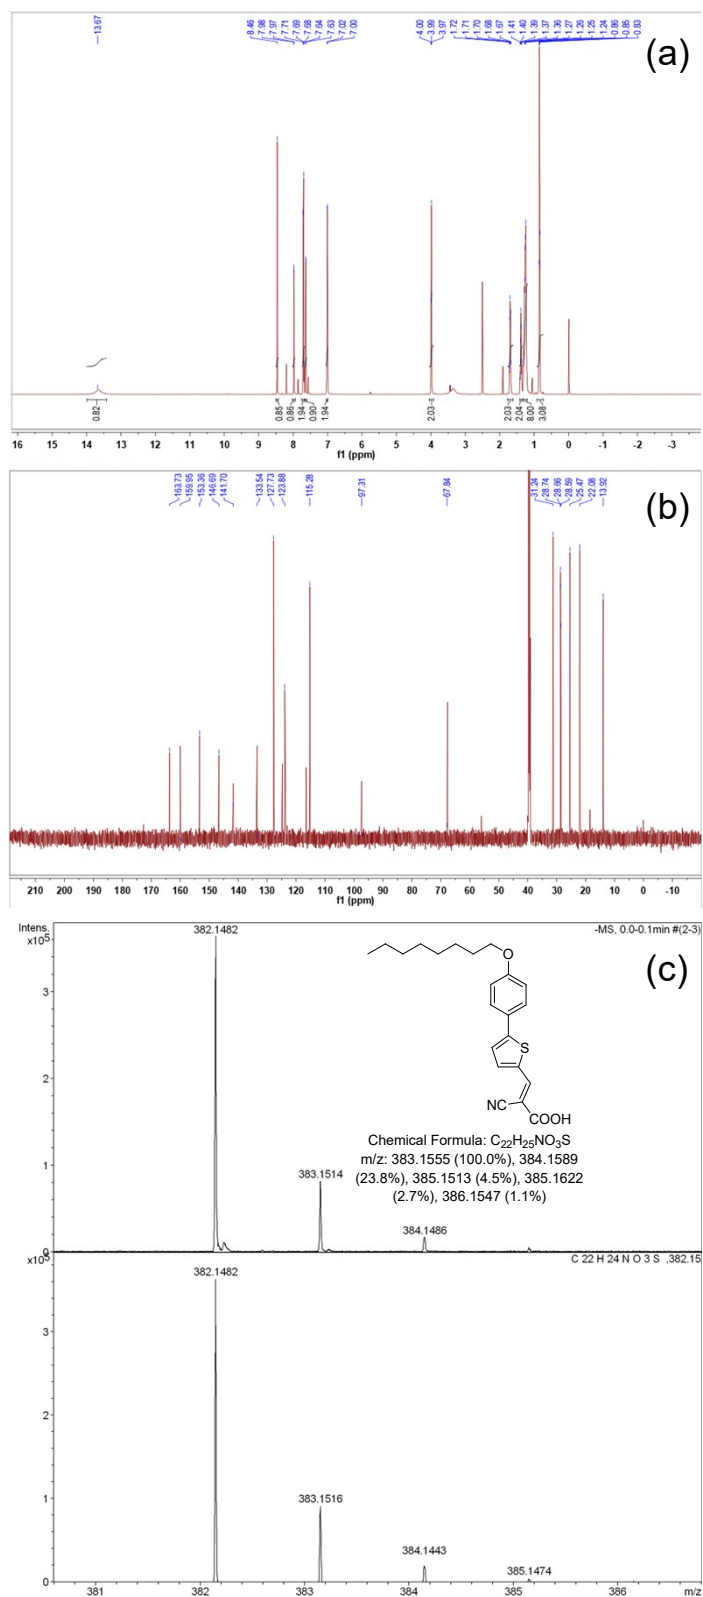

**Fig. S9.** (a)  $^1\text{H}$  NMR, (b)  $^{13}\text{C}$  NMR, and (c) HRMS of compound (E)-2-cyano-3-(5-(4-(octyloxy)phenyl)thiophen-2-yl)acrylic acid.

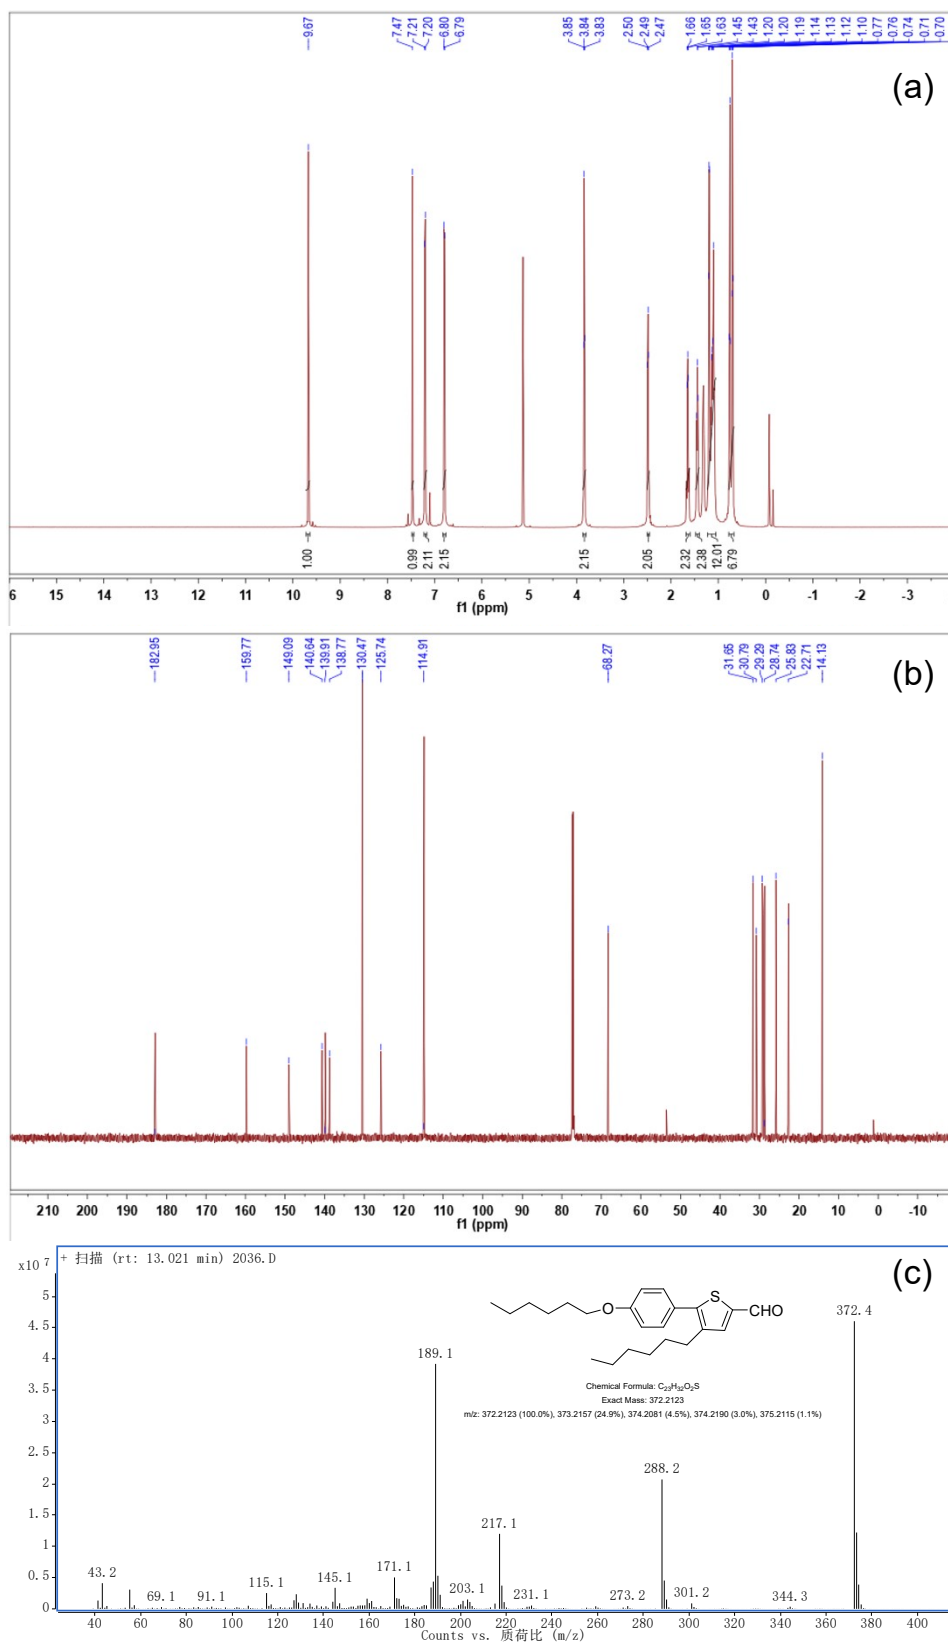

**Fig. S10.** (a)  $^1\text{H}$  NMR, (b)  $^{13}\text{C}$  NMR, and (c) GCMS of compound 4-hexyl-5-(4-(hexyloxy)phenyl)thiophene-2-carbaldehyde.

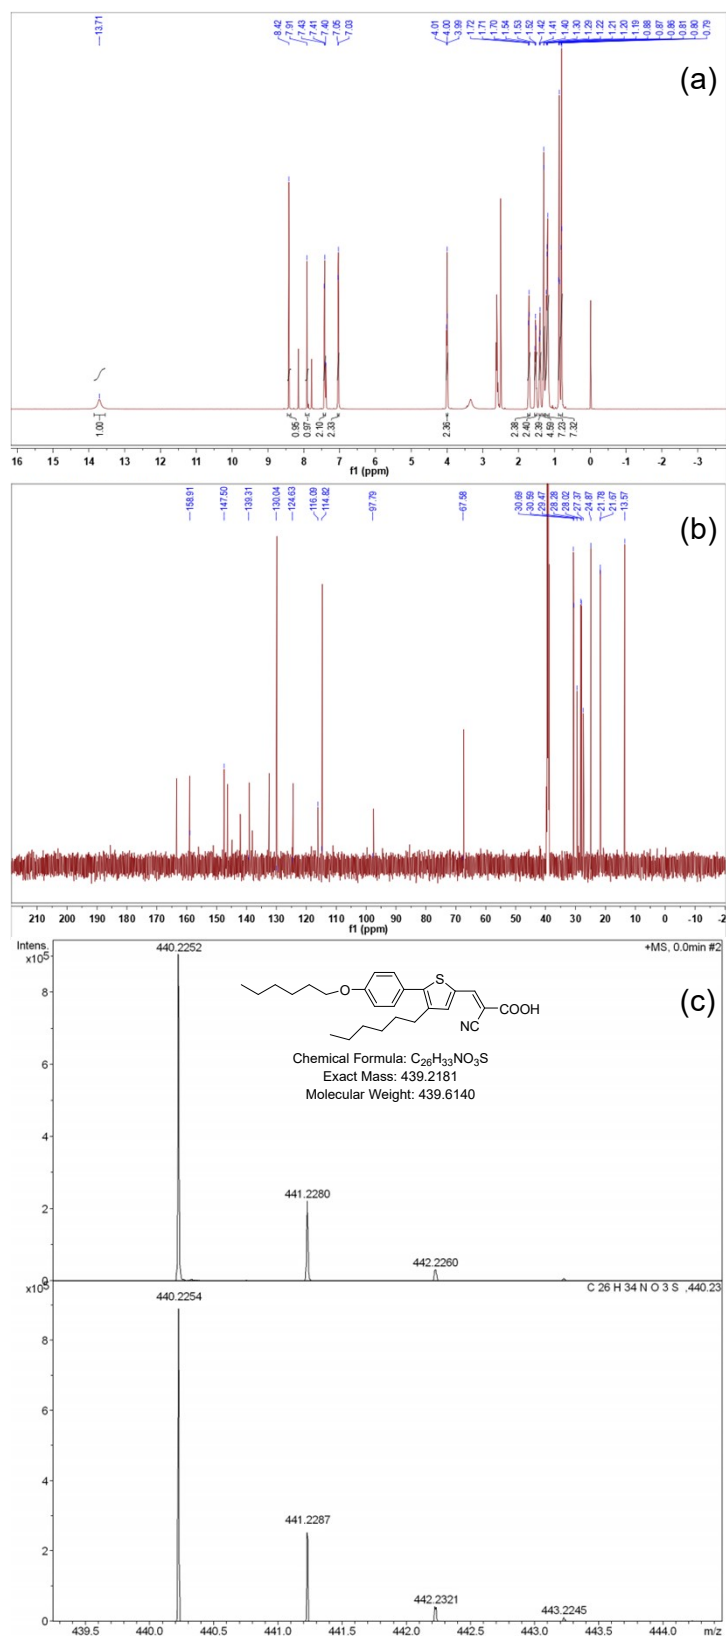

**Fig. S11.** (a)  $^1\text{H}$  NMR, (b)  $^{13}\text{C}$  NMR, and (c) HRMS of compound (E)-2-cyano-3-(4-hexyl-5-(4-(hexyloxy)phenyl)thiophen-2-yl)acrylic acid.

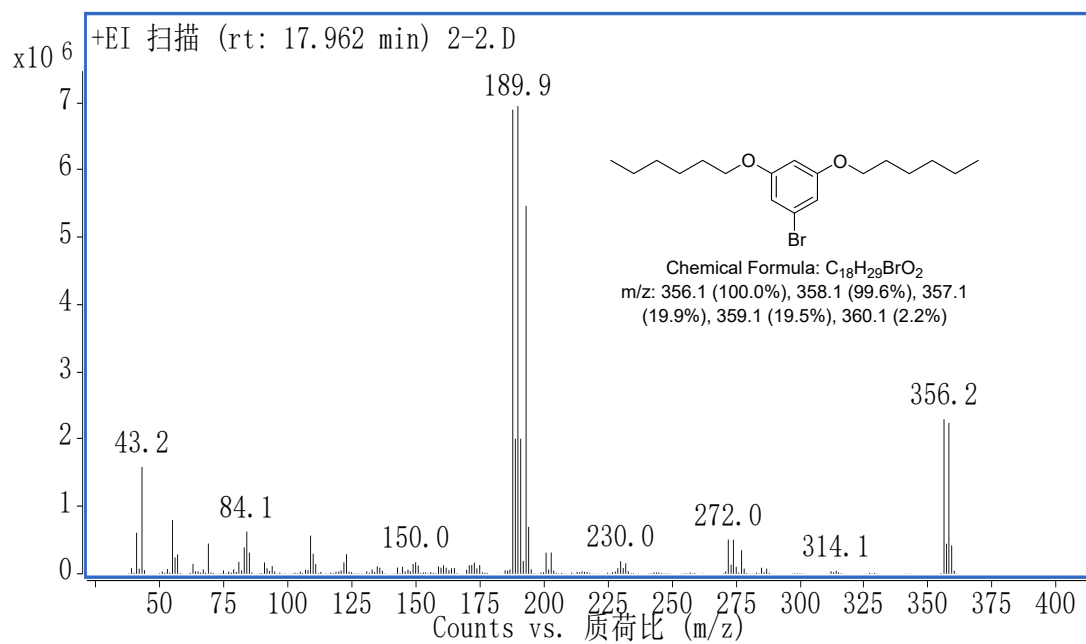

**Fig. S12.** GCMS of compound 1-bromo-3,5-bis(hexyloxy)benzene.

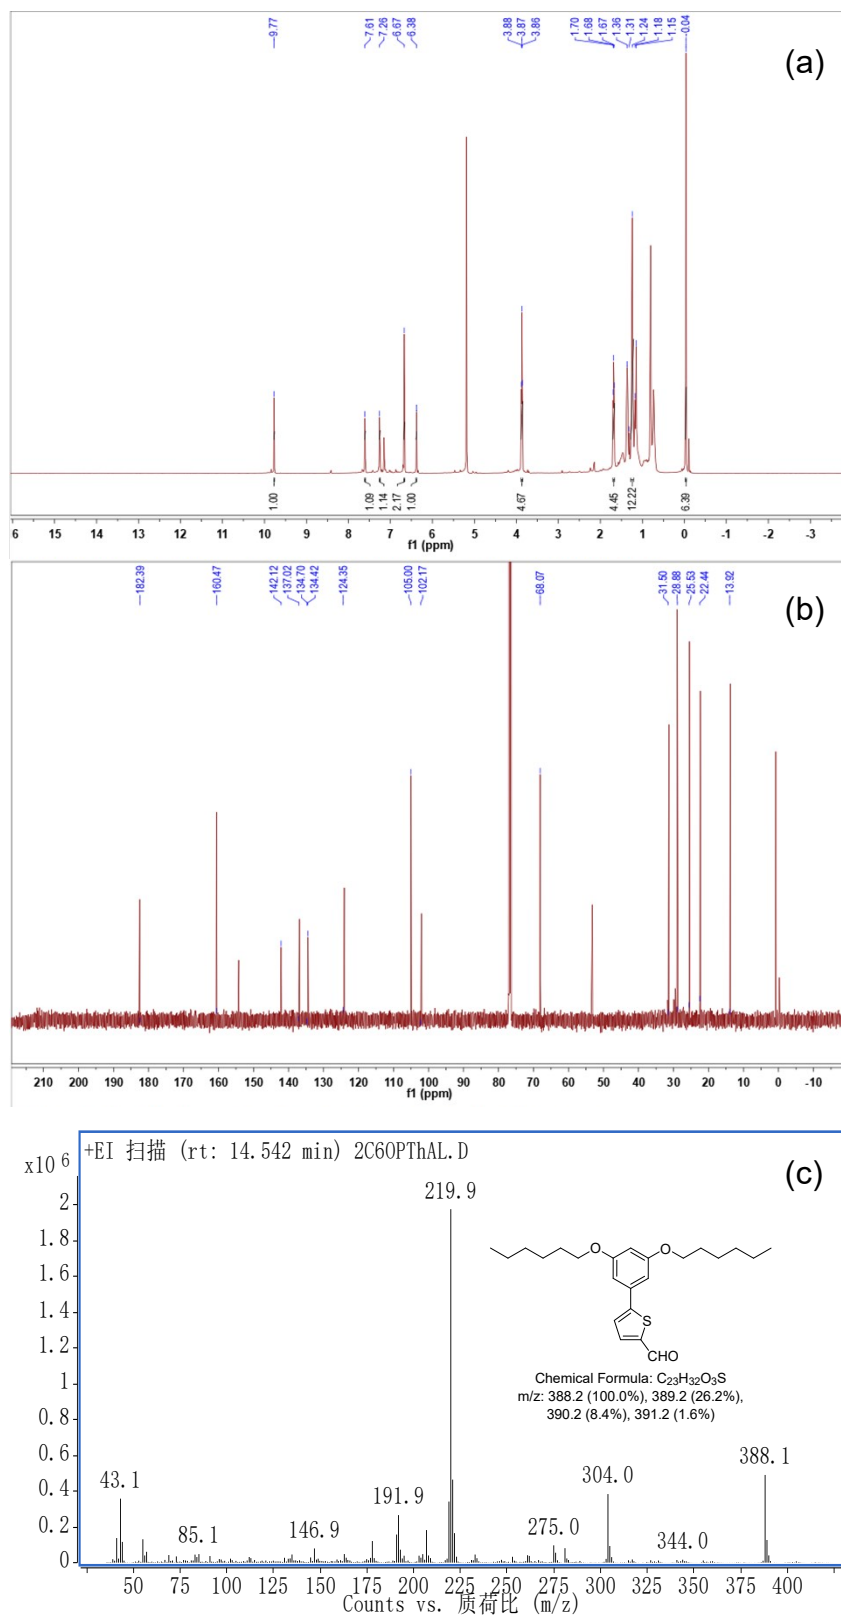

**Fig. S13.** (a)  $^1\text{H}$  NMR, (b)  $^{13}\text{C}$  NMR, and (c) GCMS of compound 5-(3,5-bis(hexyloxy)phenyl)thiophene-2-carbaldehyde.

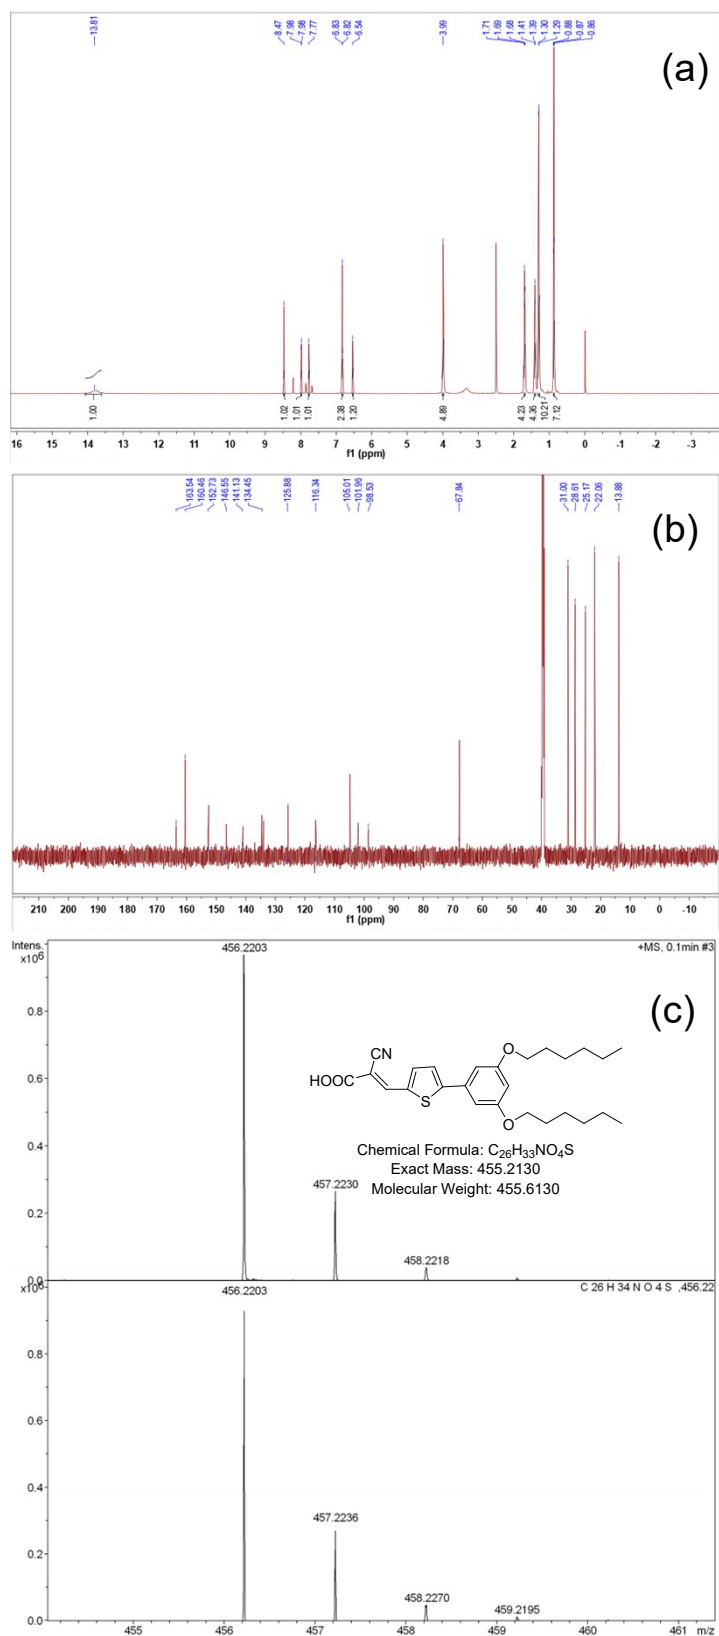

**Fig. S14.** (a)  $^1\text{H}$  NMR, (b)  $^{13}\text{C}$  NMR, and (c) HRMS of compound E)-3-(5-(3,5-bis(hexyloxy)phenyl)thiophen-2-yl)-2-cyanoacrylic acid.

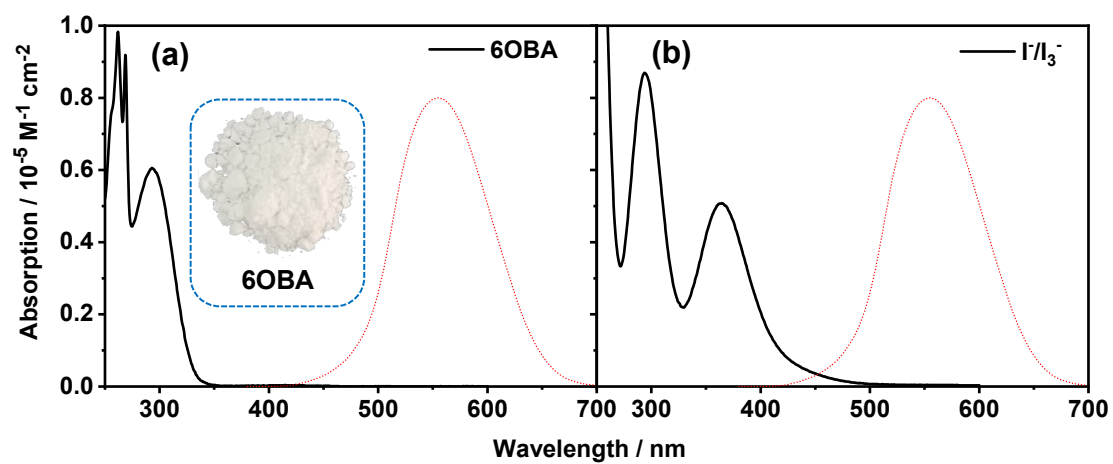

Fig. S15. (a), (b) UV-vis absorption spectra of **6OBA** and I<sup>-</sup>/I<sub>3</sub><sup>-</sup> in DCM.

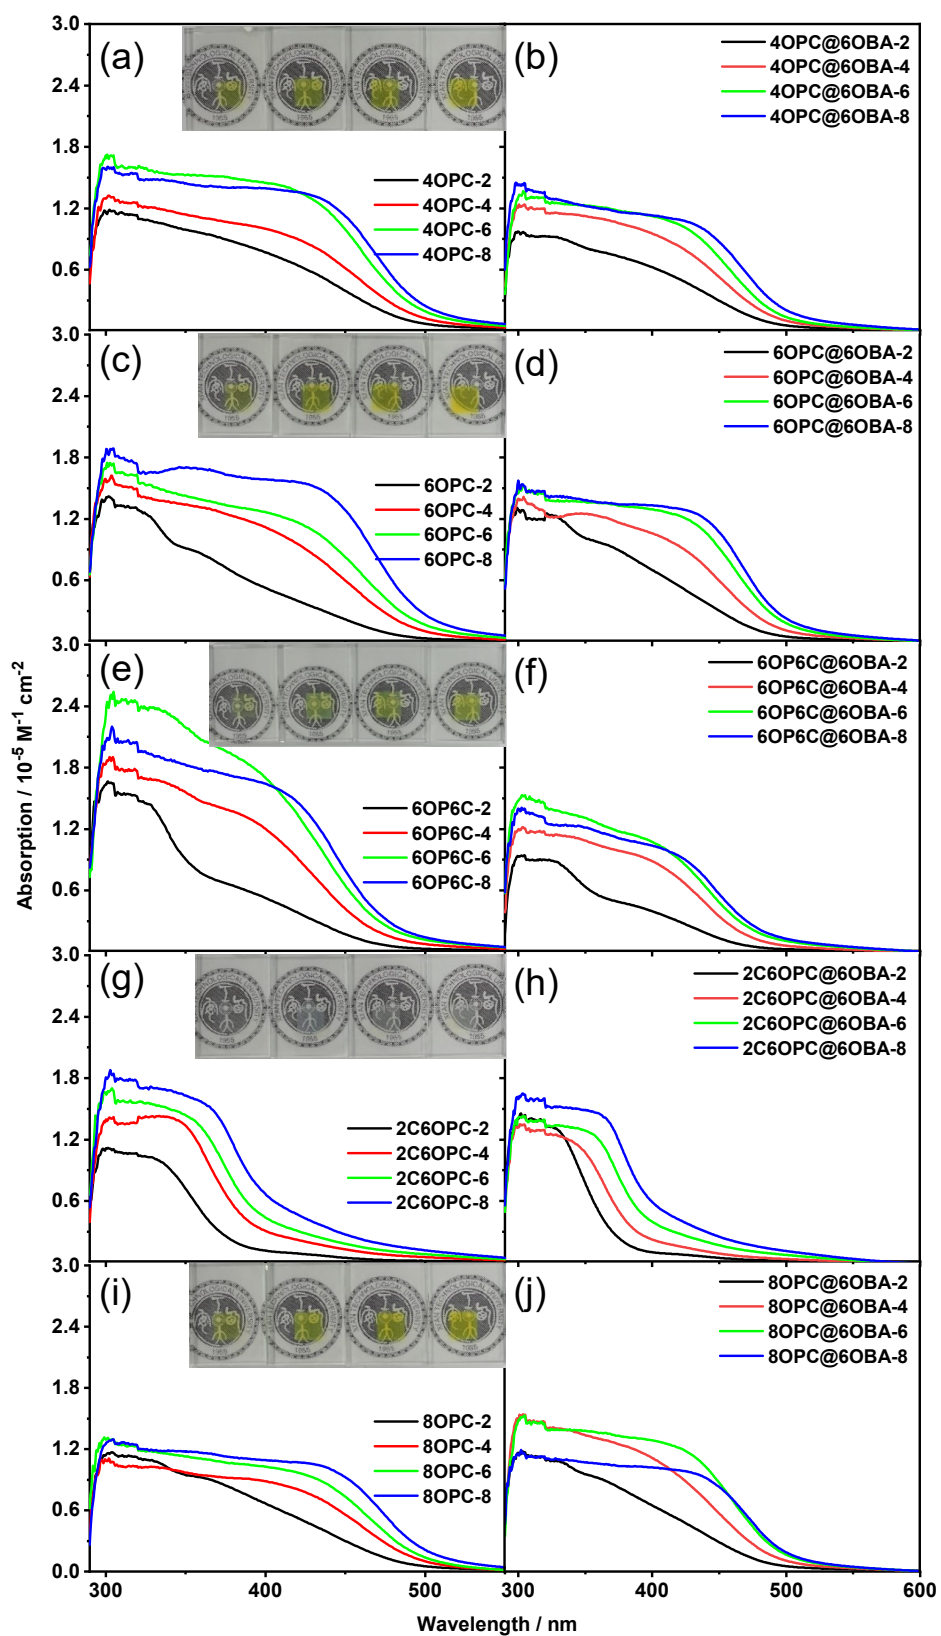

**Fig. S16.** (a)~(j) UV-vis absorption spectra of the single sensitizer and co-sensitizer adsorbed on  $\text{TiO}_2$  films of different thickness (2, 4, 6, 8  $\mu\text{m}$ ).



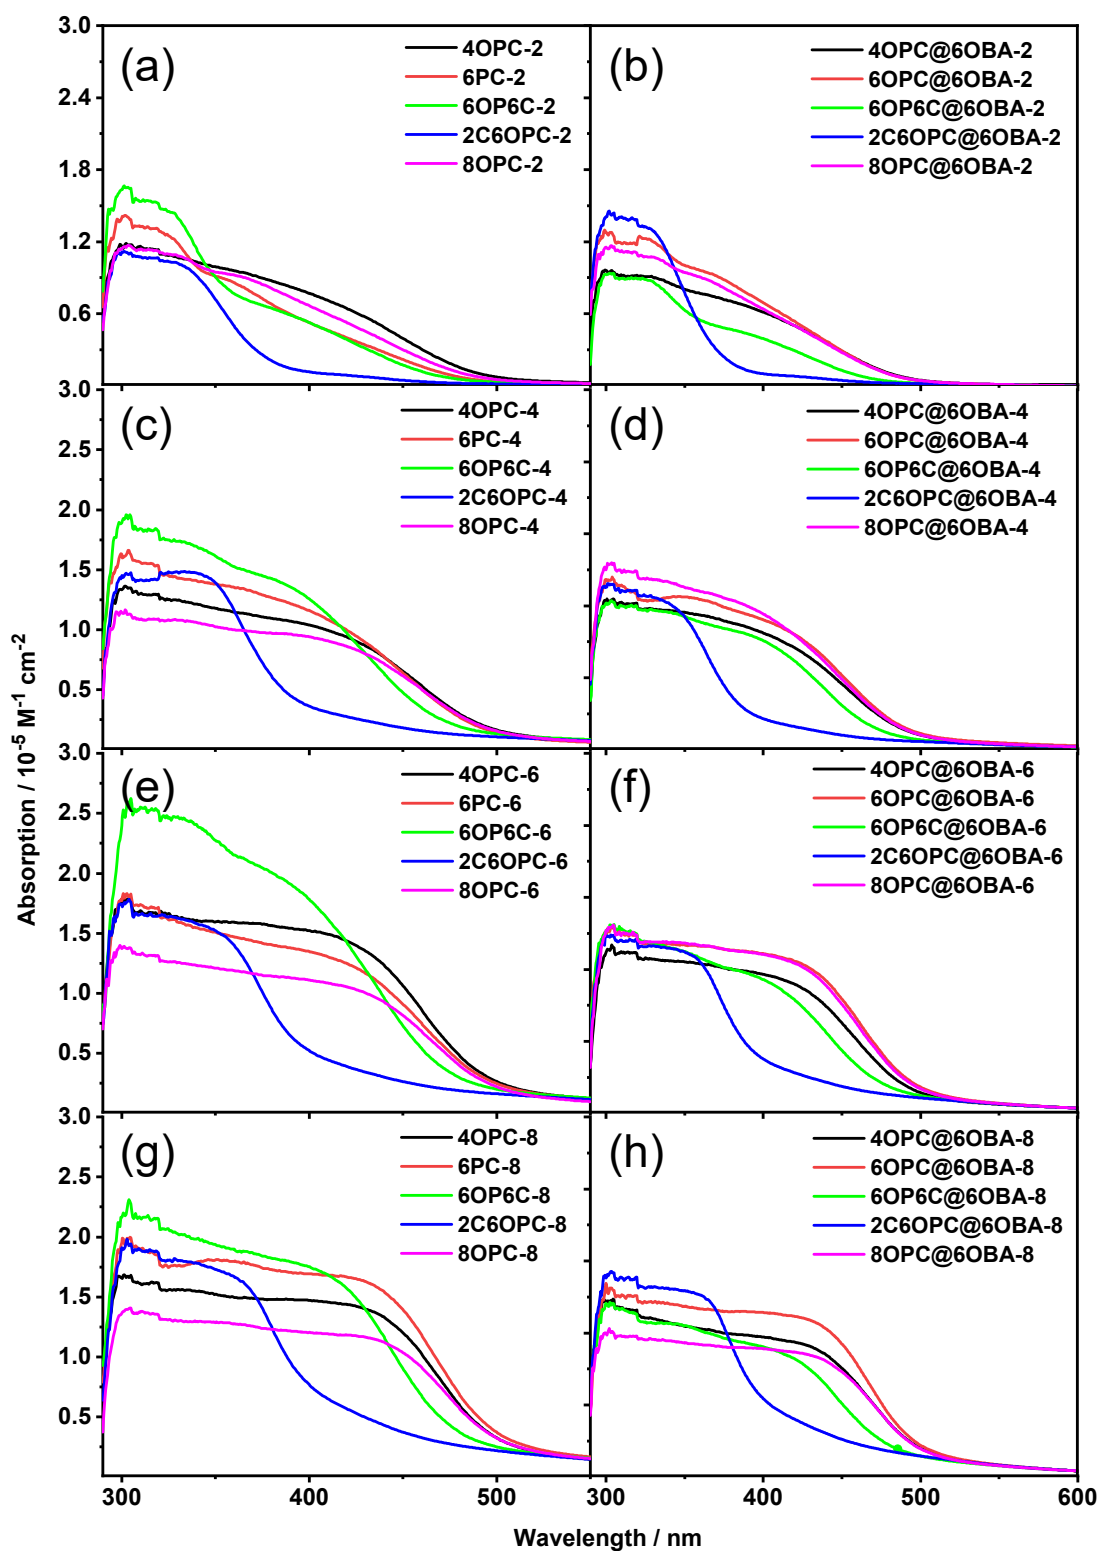

Fig. S17. (a)~(h) UV-vis absorption spectra of single sensitizers and co-sensitizers adsorbed on TiO<sub>2</sub> films of the same thickness.

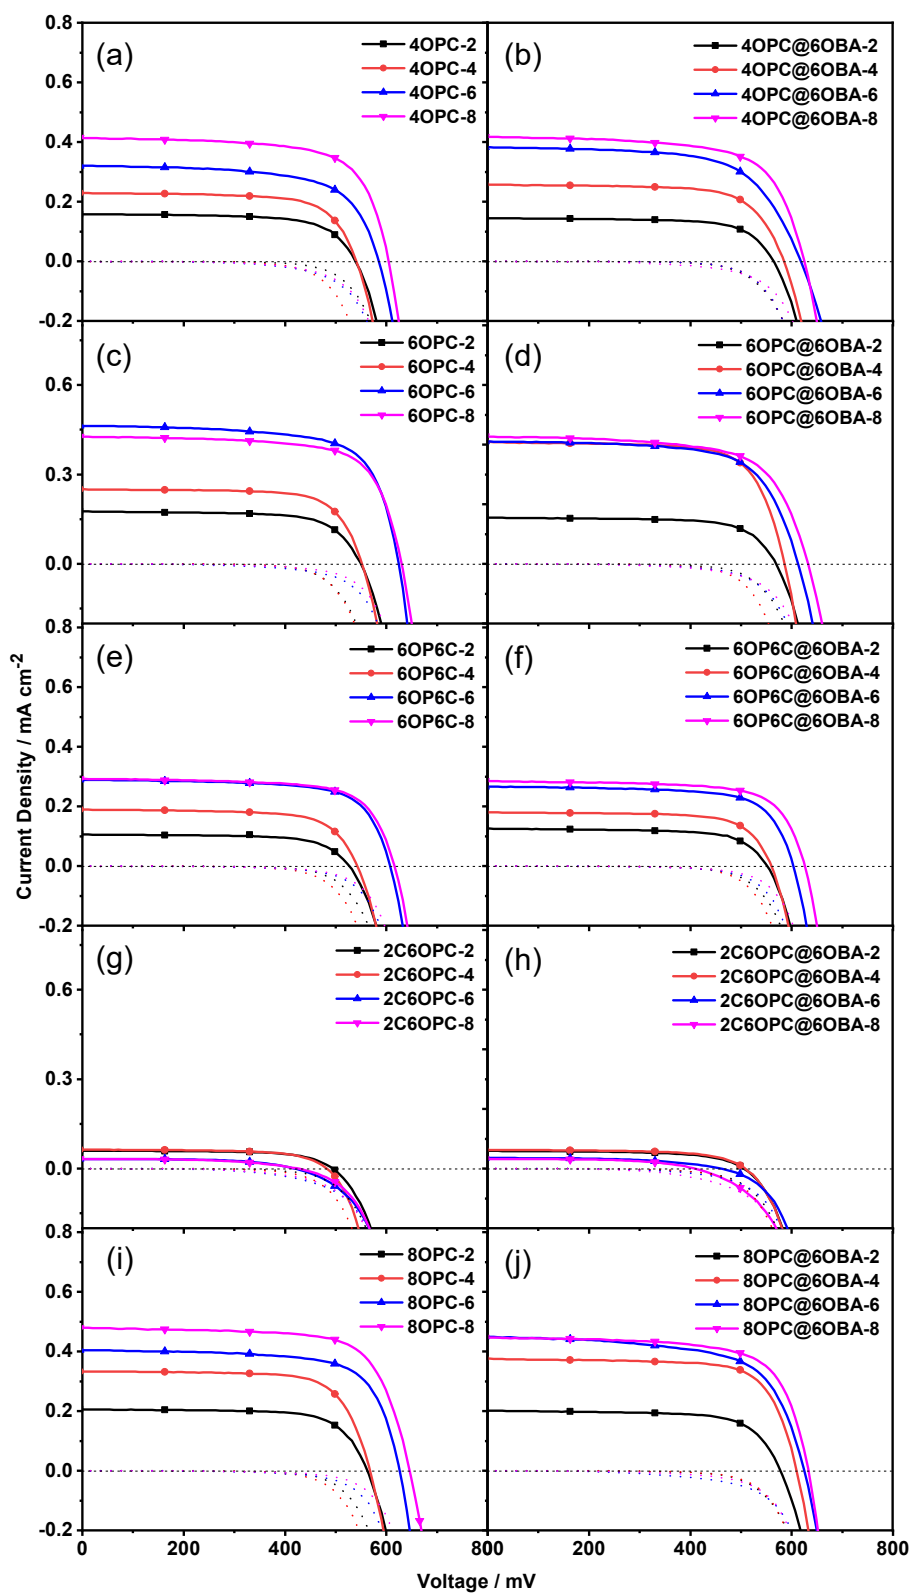

**Fig. S18.** (a)~(j) Comparison of current density-voltage and dark current curves of single sensitizers and co-sensitizers coated with different  $\text{TiO}_2$  thicknesses measured under AM1.5G,  $100 \text{ mW cm}^{-2}$  conditions.

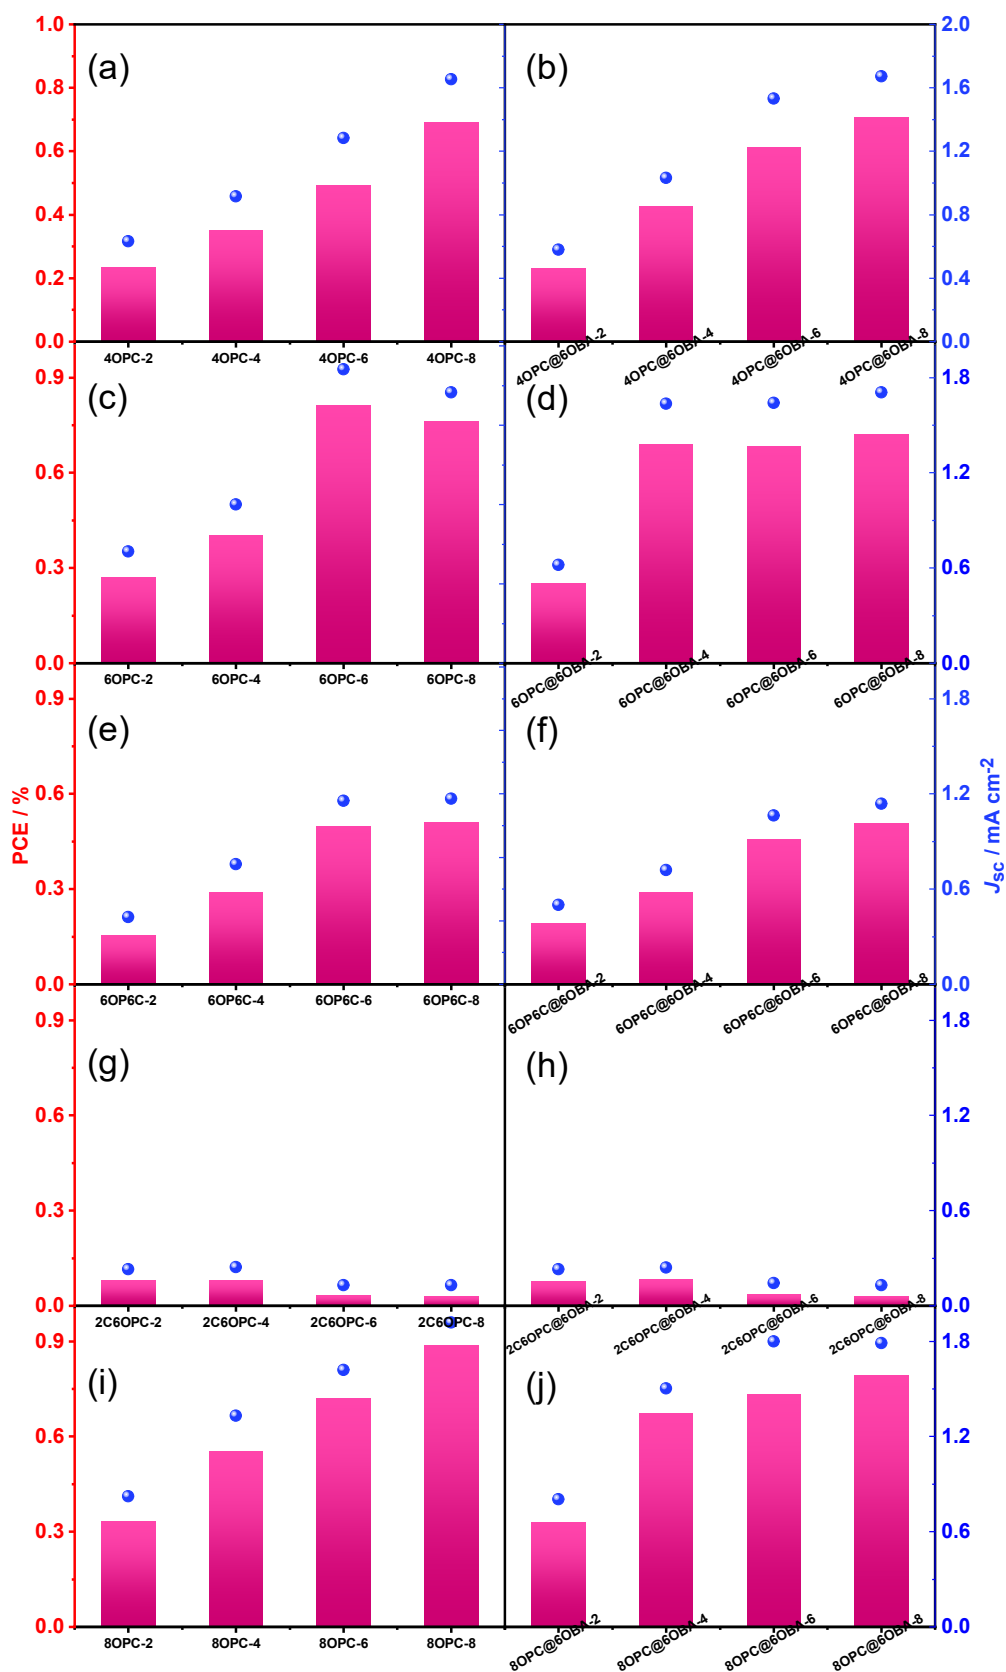

Fig. S19. PCE and  $J_{sc}$  of DSSCs based on sensitizers and co-sensitizers.

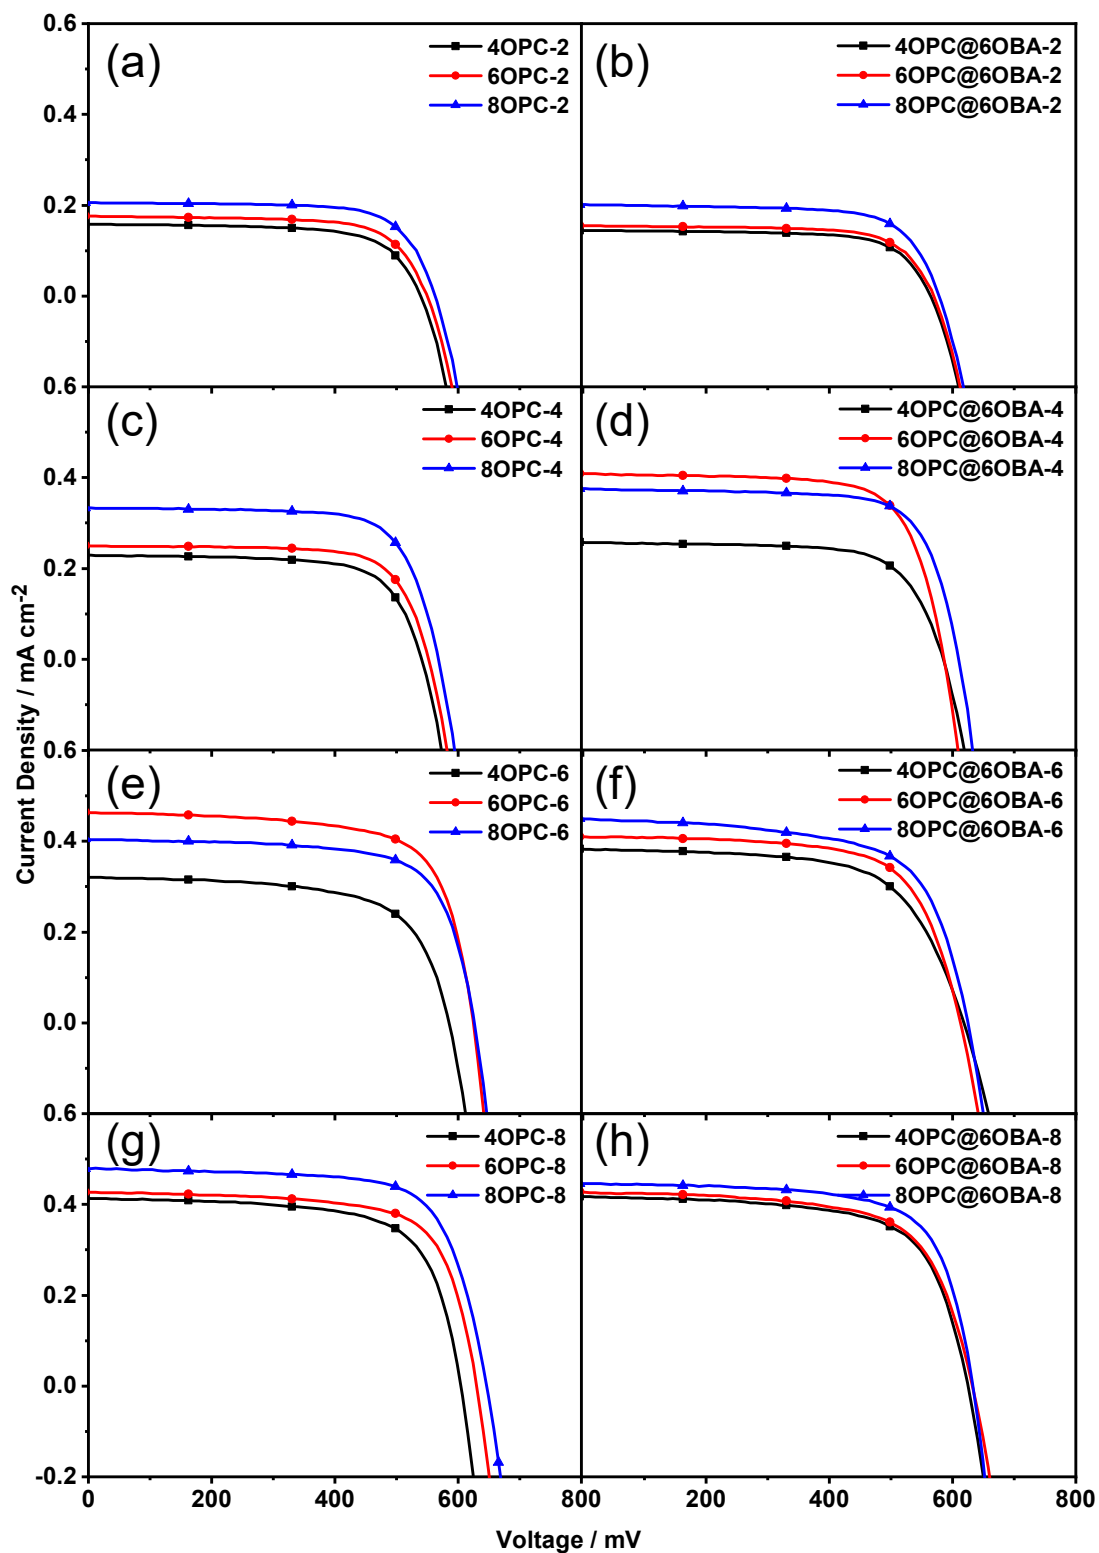

Fig. S20. Current density-voltage curves of the DSSCs with prepared with  $\text{TiO}_2$  films of different thickness measured under AM1.5G,  $100 \text{ mWcm}^{-2}$  condition.

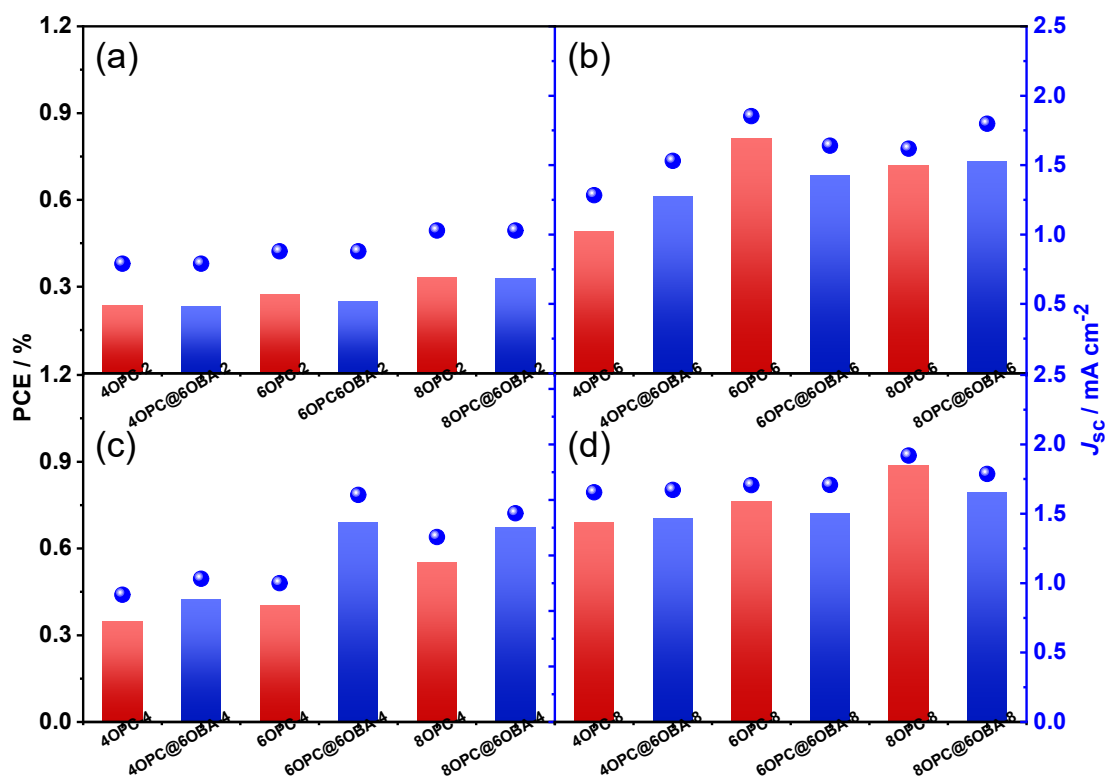

**Fig. S21.** PCE and  $J_{sc}$  of DSSCs based on sensitizers and co-sensitizers AM1.5G, 100 mWcm<sup>-2</sup>.

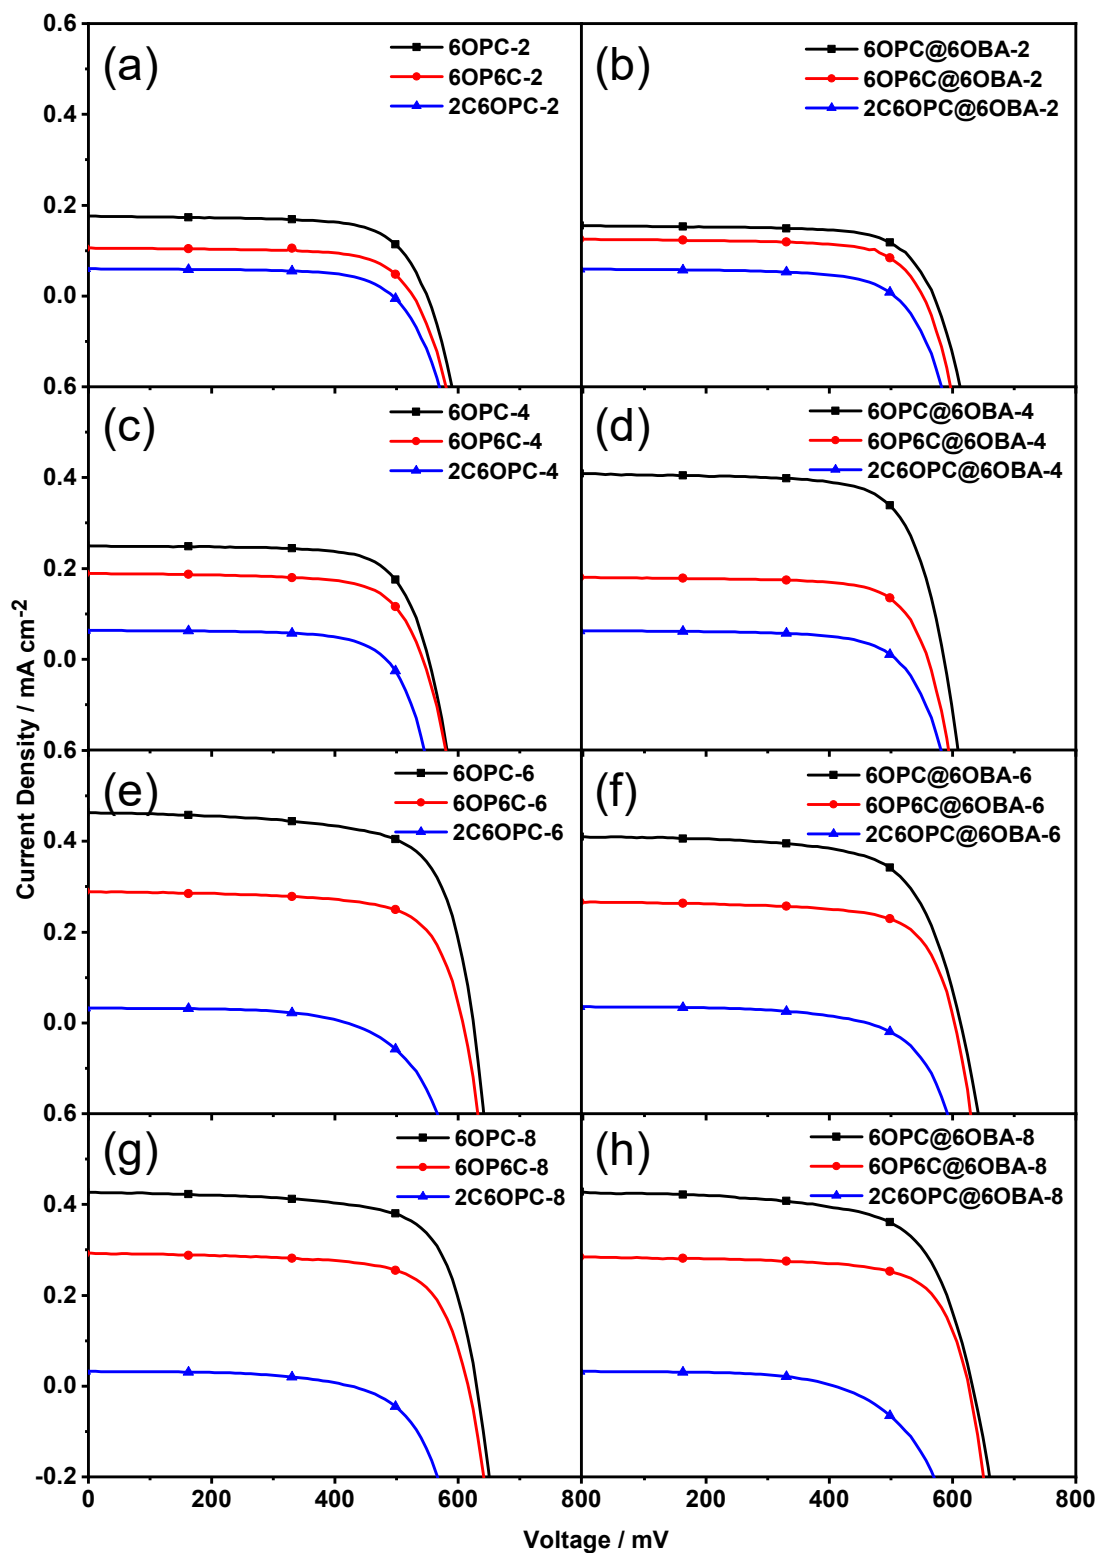

Fig. S22. Current density-voltage curves of the DSSCs with prepared with  $\text{TiO}_2$  films of different thickness measured under AM1.5G,  $100 \text{ mWcm}^{-2}$  condition.

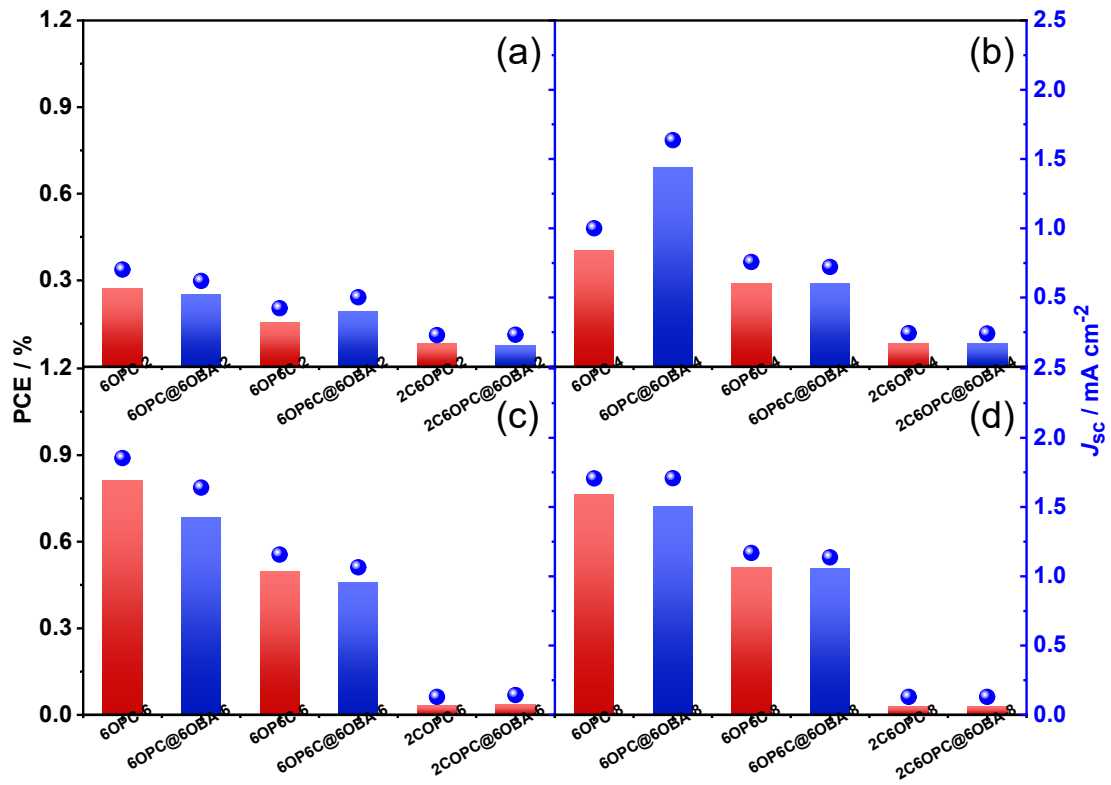

**Fig. S23.** PCE and  $J_{sc}$  of DSSCs based on sensitizers and co-sensitizers at AM1.5G, 100 mWcm<sup>-2</sup>.

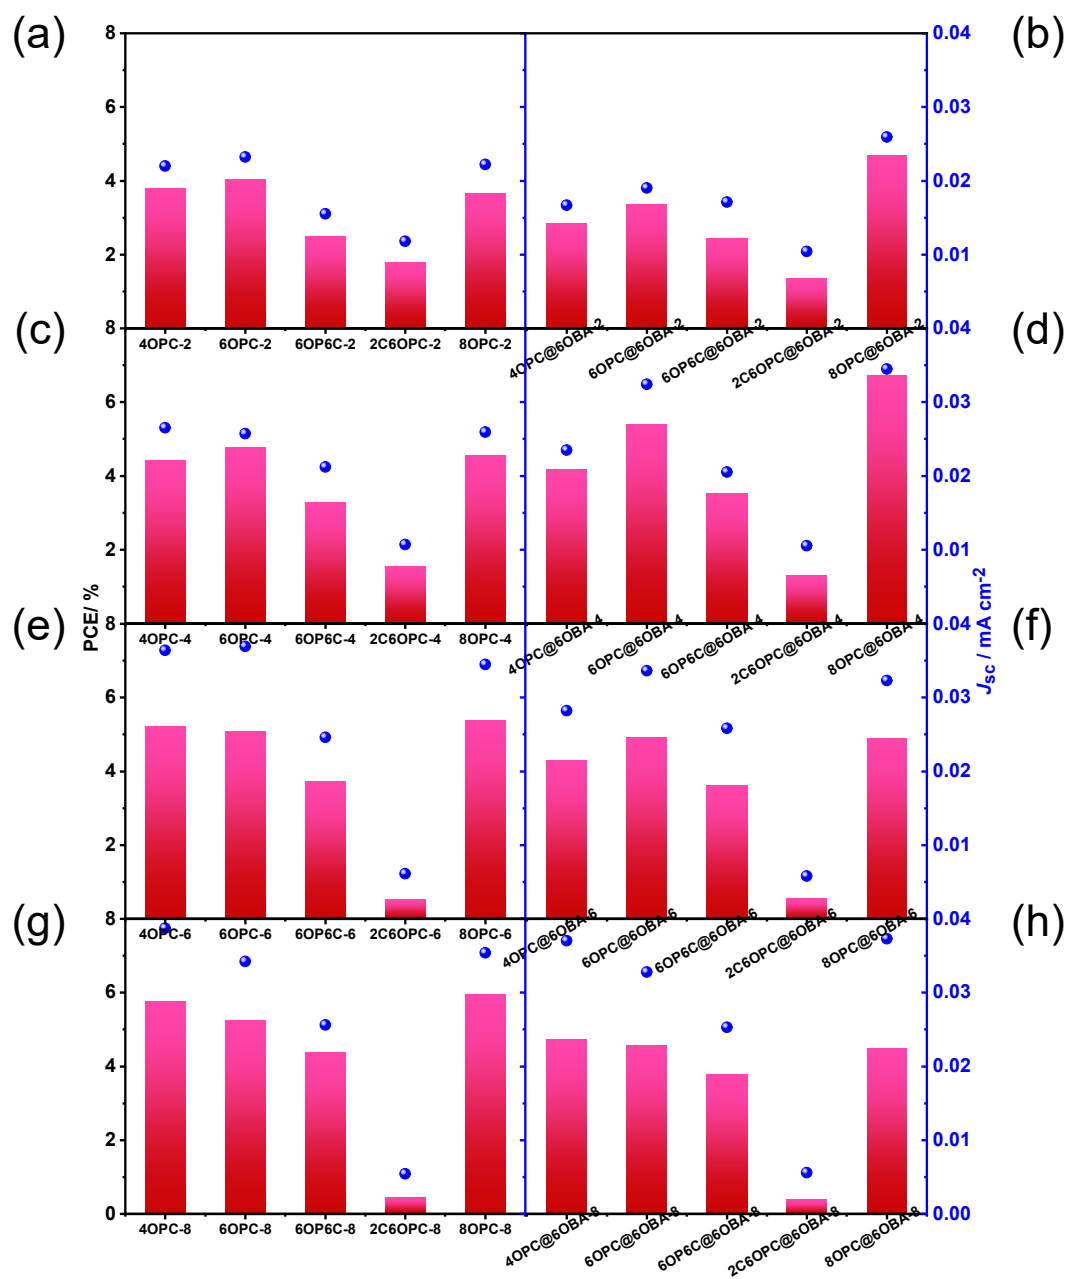

**Fig. S24.** PCE and  $J_{sc}$  of DSSCs based on sensitizers and co-sensitizers UVA LED radiation (365 nm,  $150 \mu\text{W cm}^{-2}$ ).



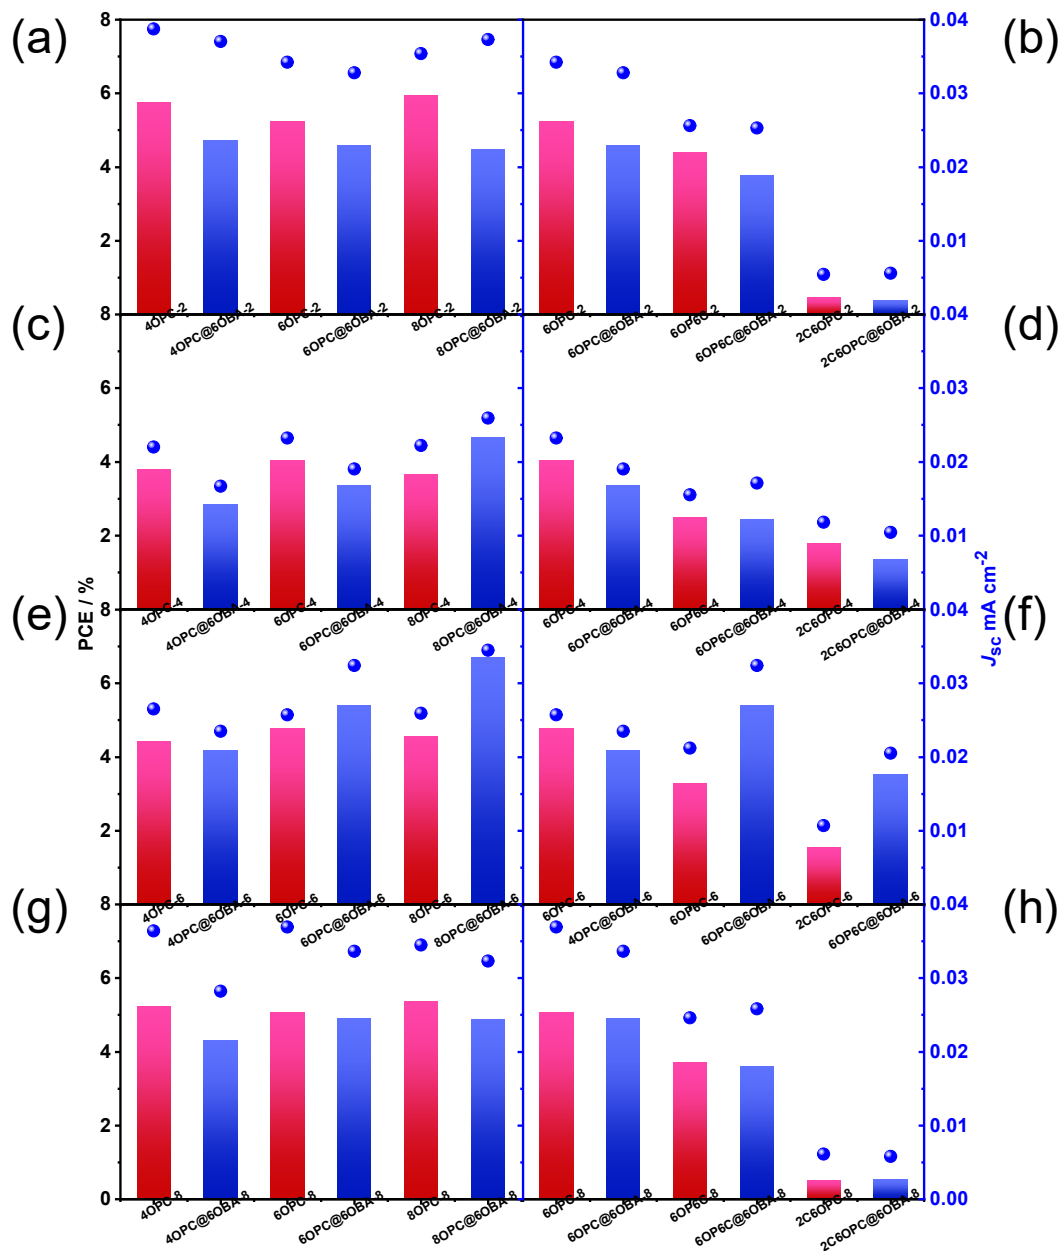

**Fig. S25.** PCE and  $J_{sc}$  of DSSCs based on sensitizers and co-sensitizers UVA LED radiation ( $365 \text{ nm}$ ,  $150 \mu\text{W cm}^{-2}$ ).

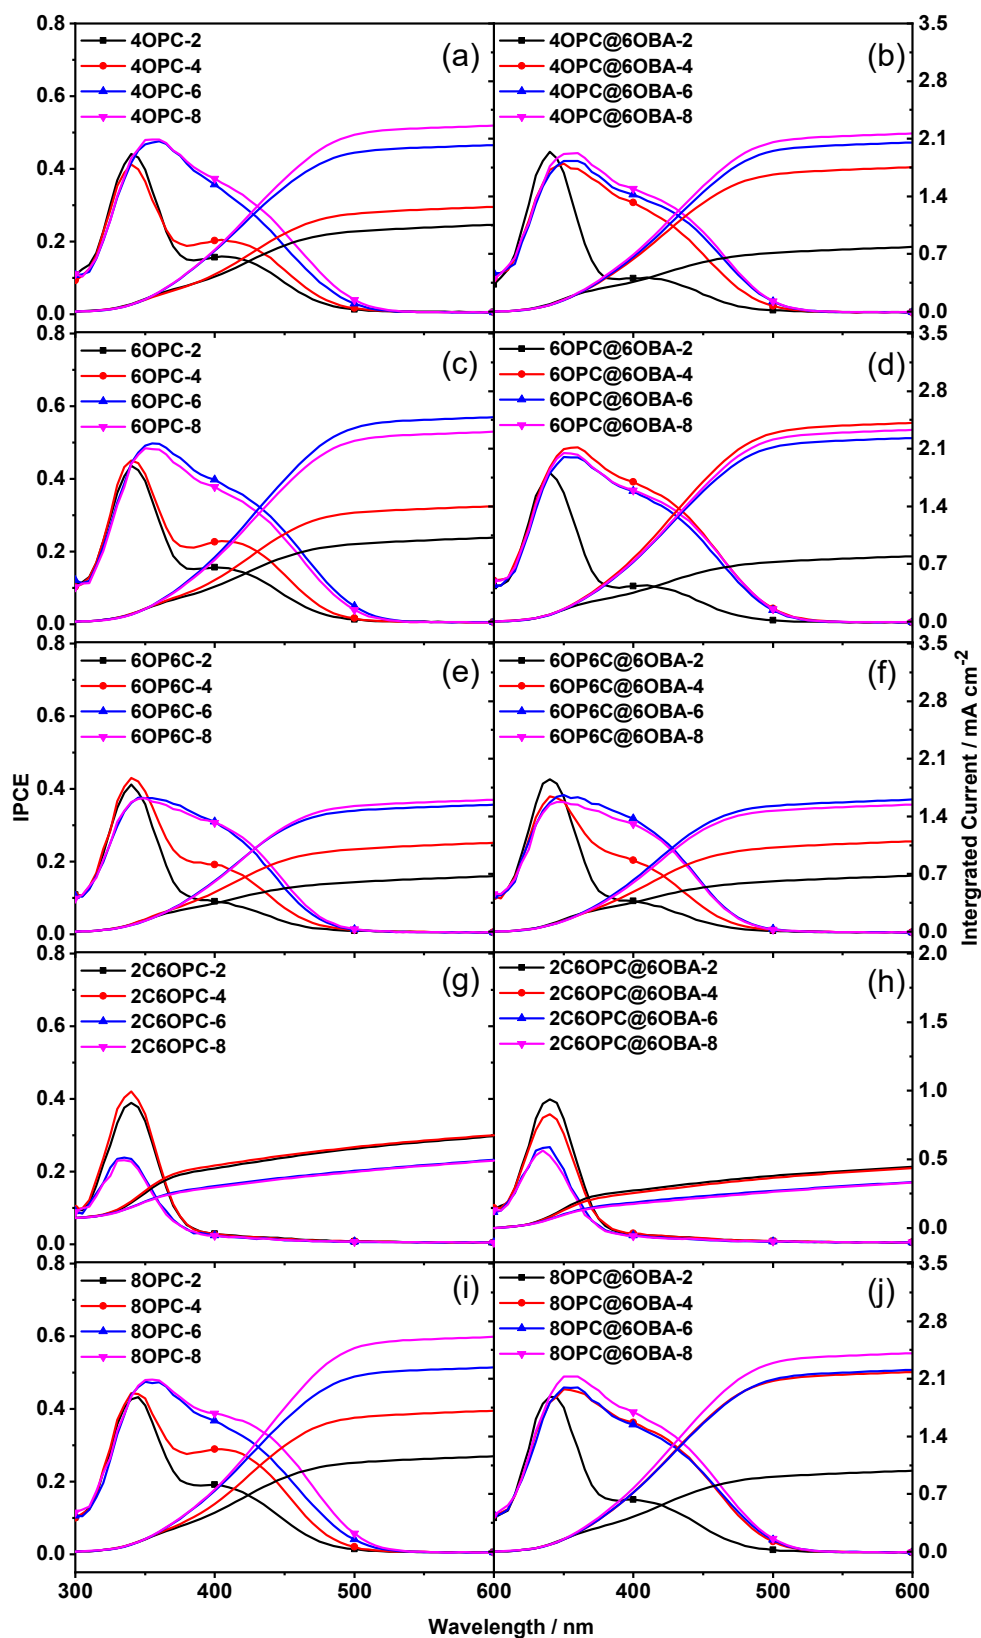

**Fig. S26.** IPCE and Integrated current of DSSCs based on sensitizers and co-sensitizers.

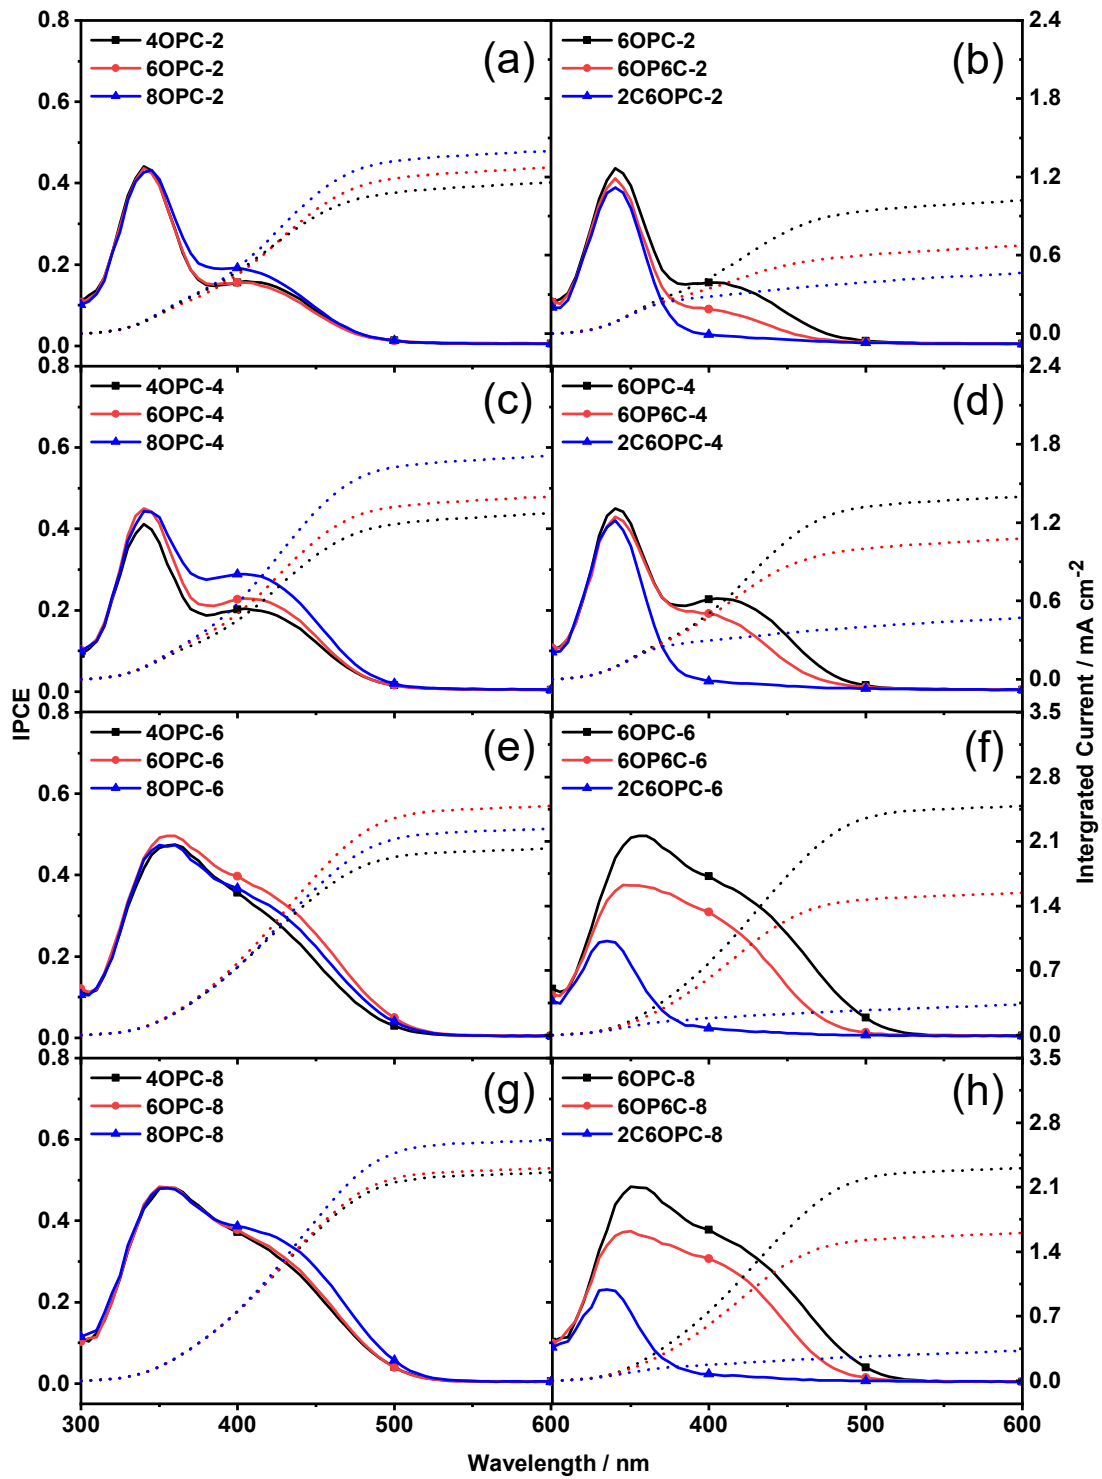

Fig. S27. IPCE and Integrated current of DSSCs based on sensitizers.

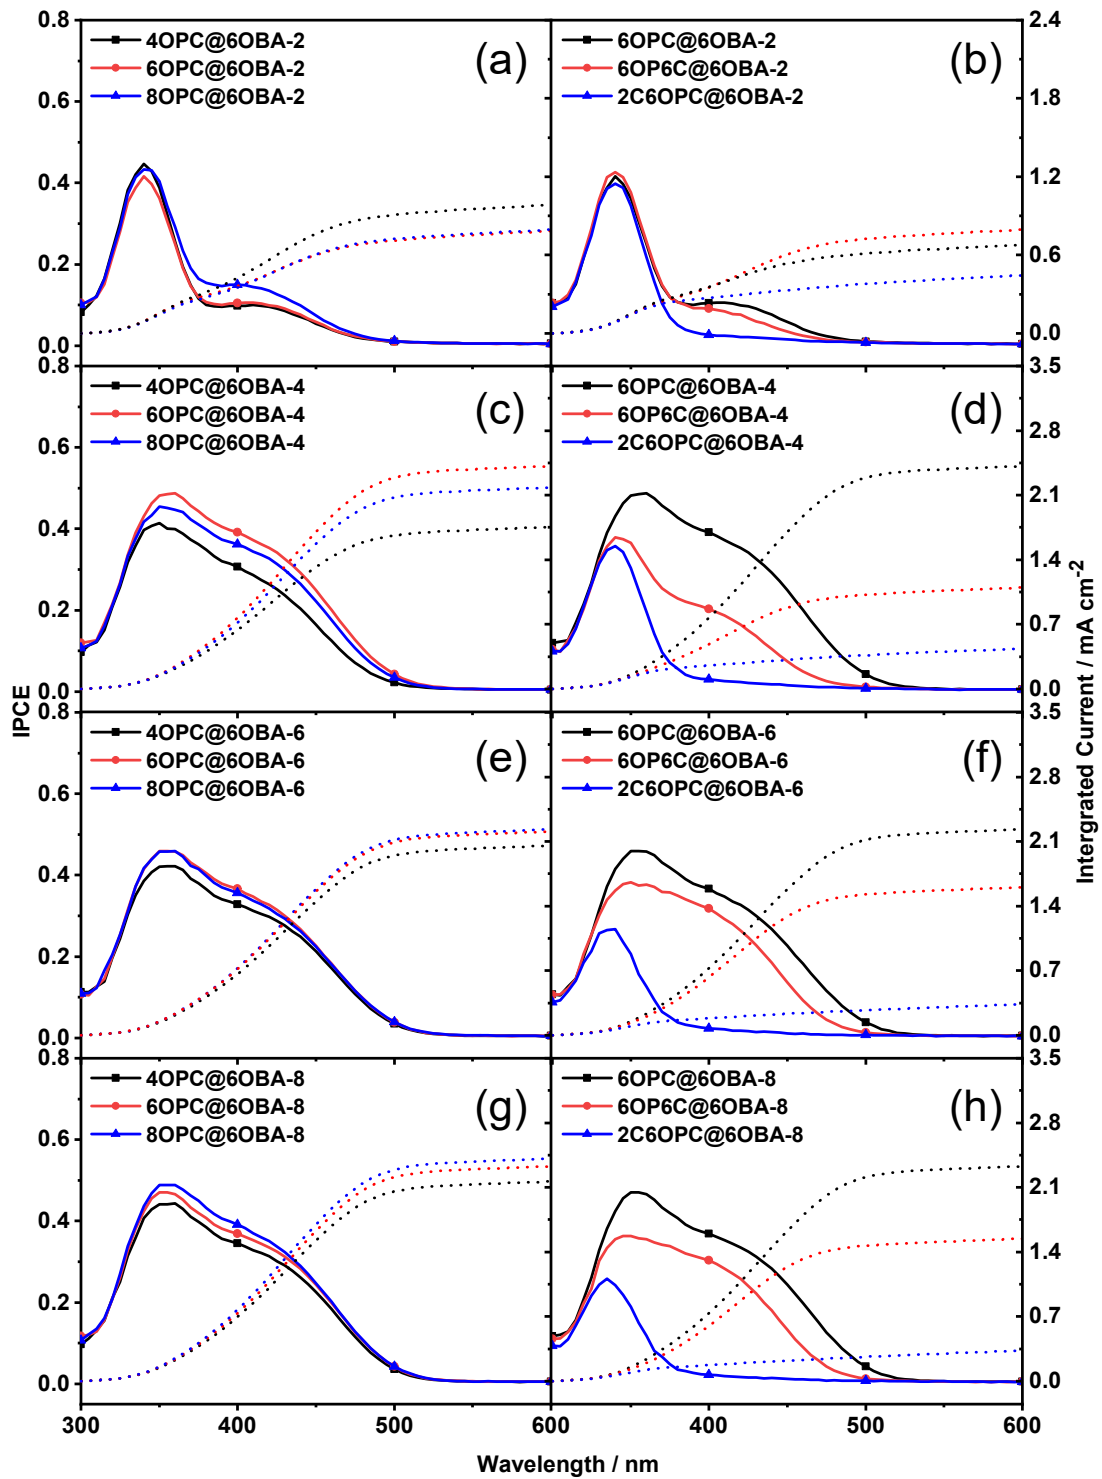

Fig. S28. IPCE and Integrated current of DSSCs based on co-sensitizers.

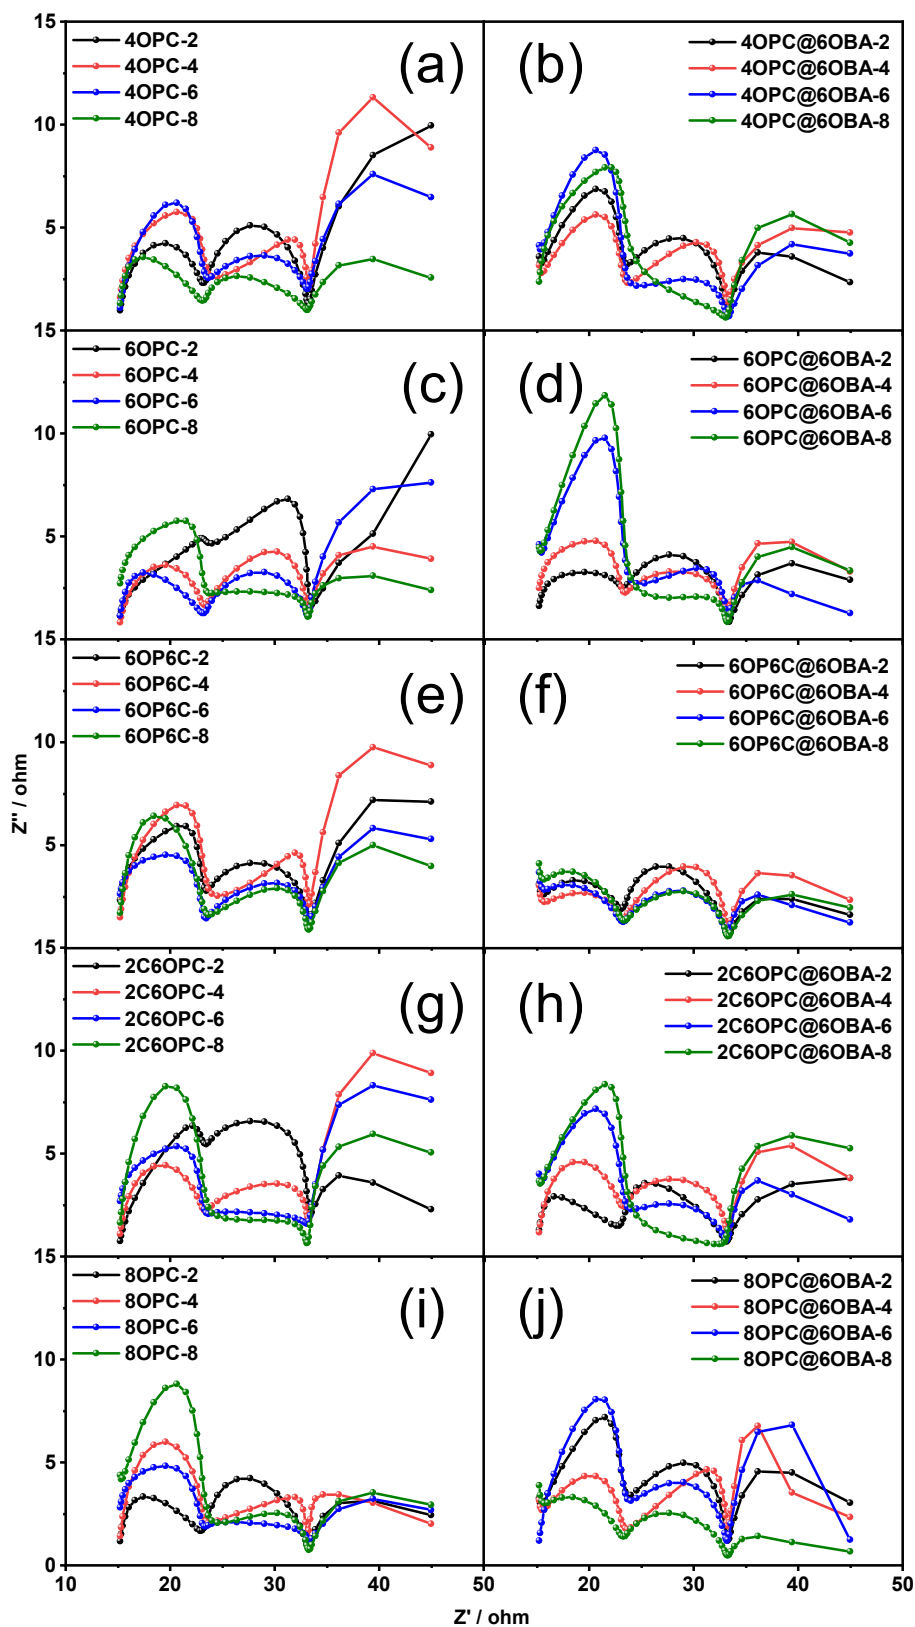

Fig. S29. EIS spectra for DSSCs based on sensitizers and co-sensitizers: Nyquist.

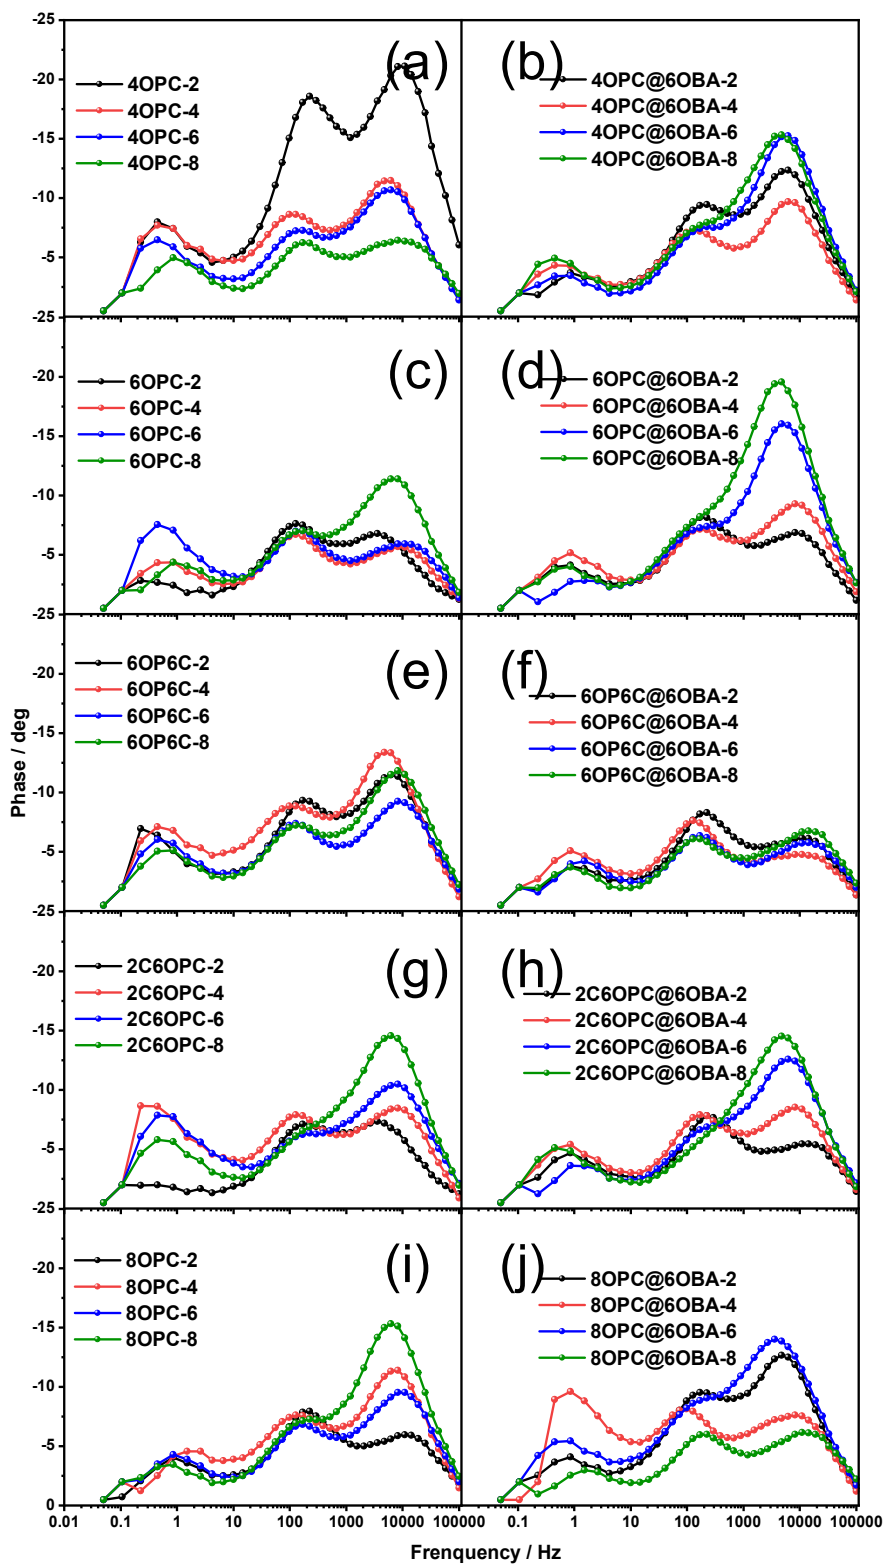

**Fig. S30.** EIS spectra for DSSCs based on sensitizers and co-sensitizers: Bode phase plots.

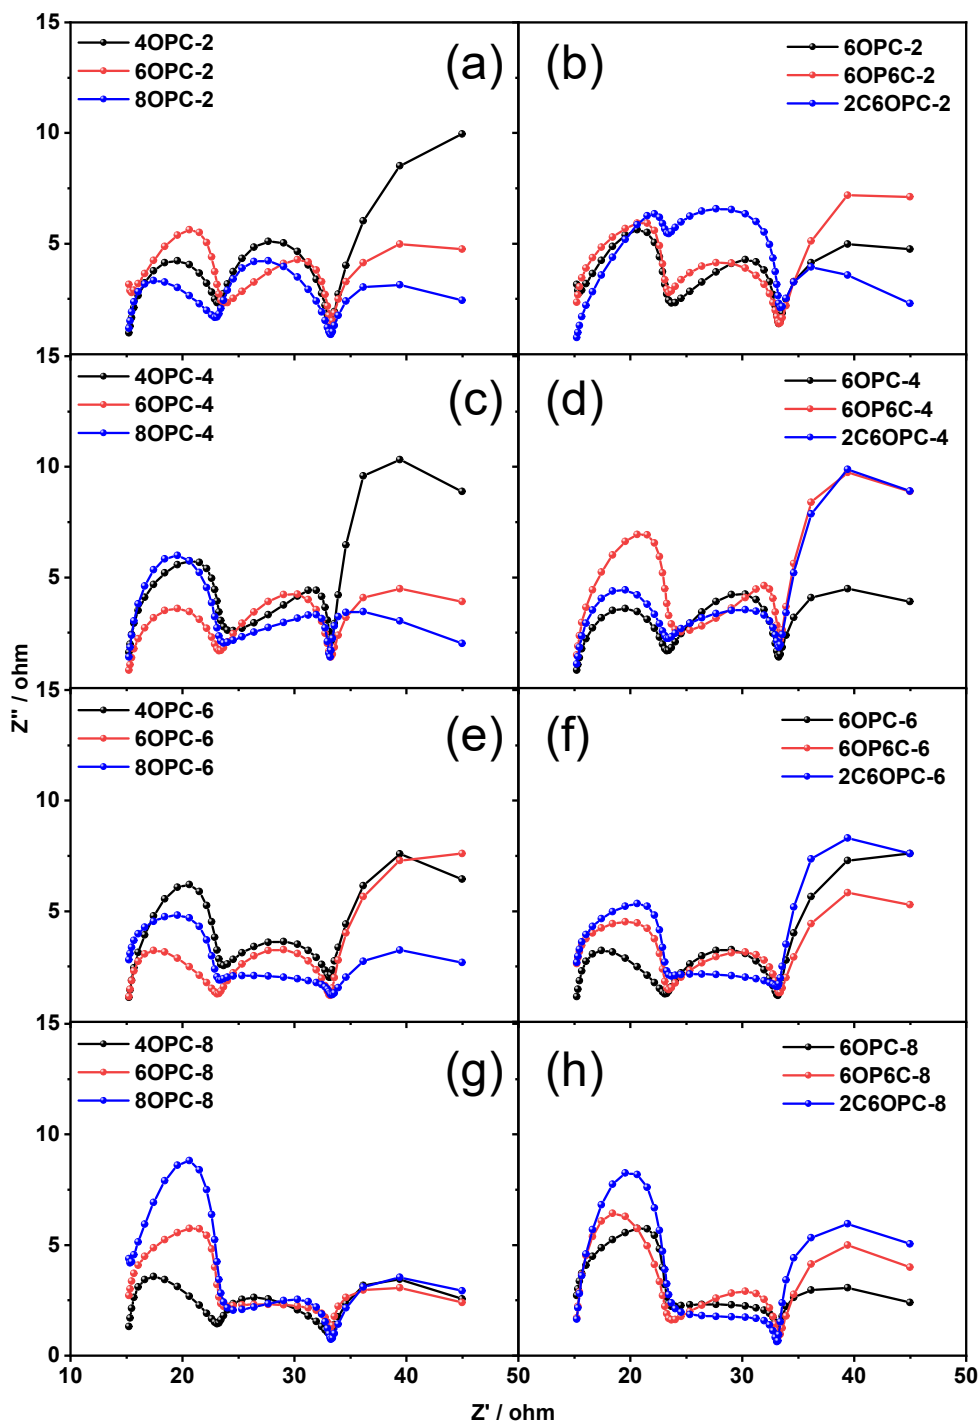

**Fig. S31.** EIS spectra for DSSCs based on sensitizers: Nyquist.

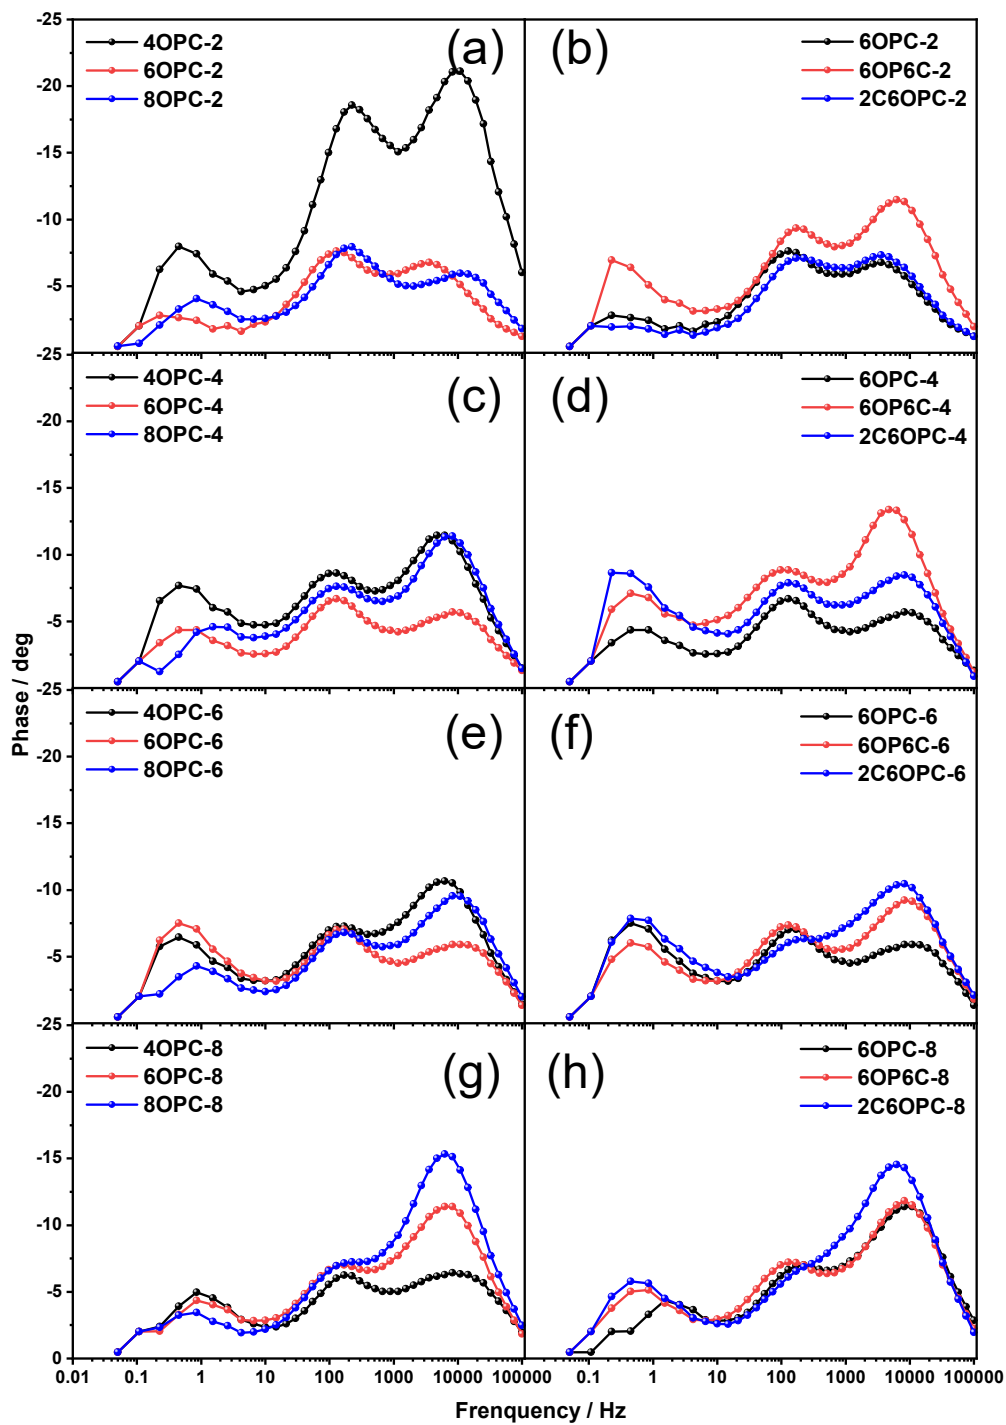

**Fig. S32.** EIS spectra for DSSCs based on sensitizers: Bode phase plots.



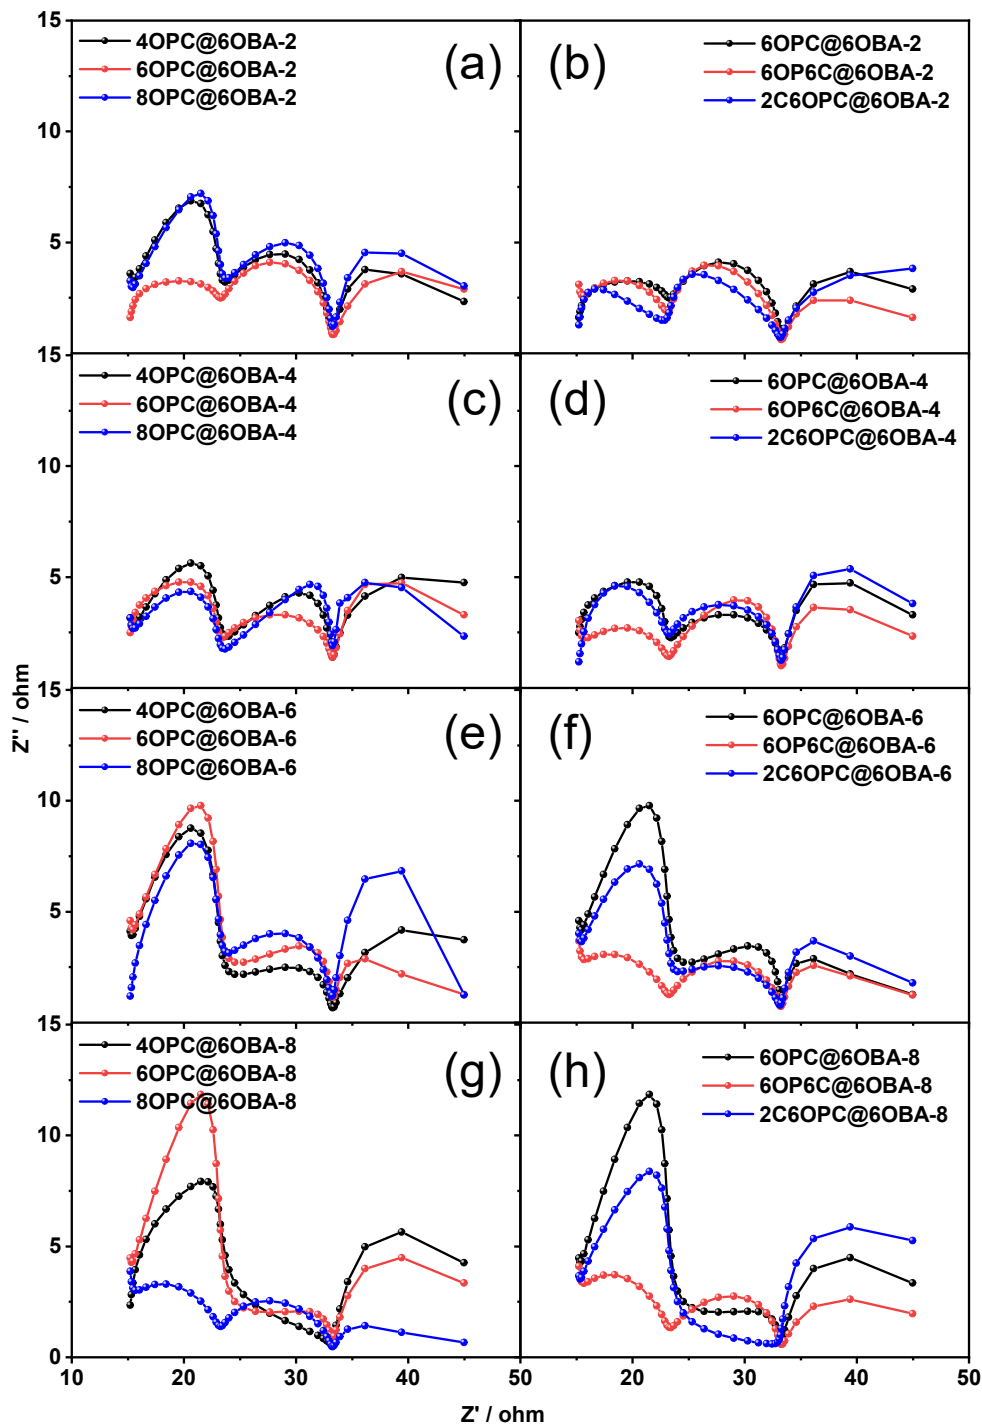

**Fig. S33.** EIS spectra for DSSCs based on co-sensitizers: Nyquist.

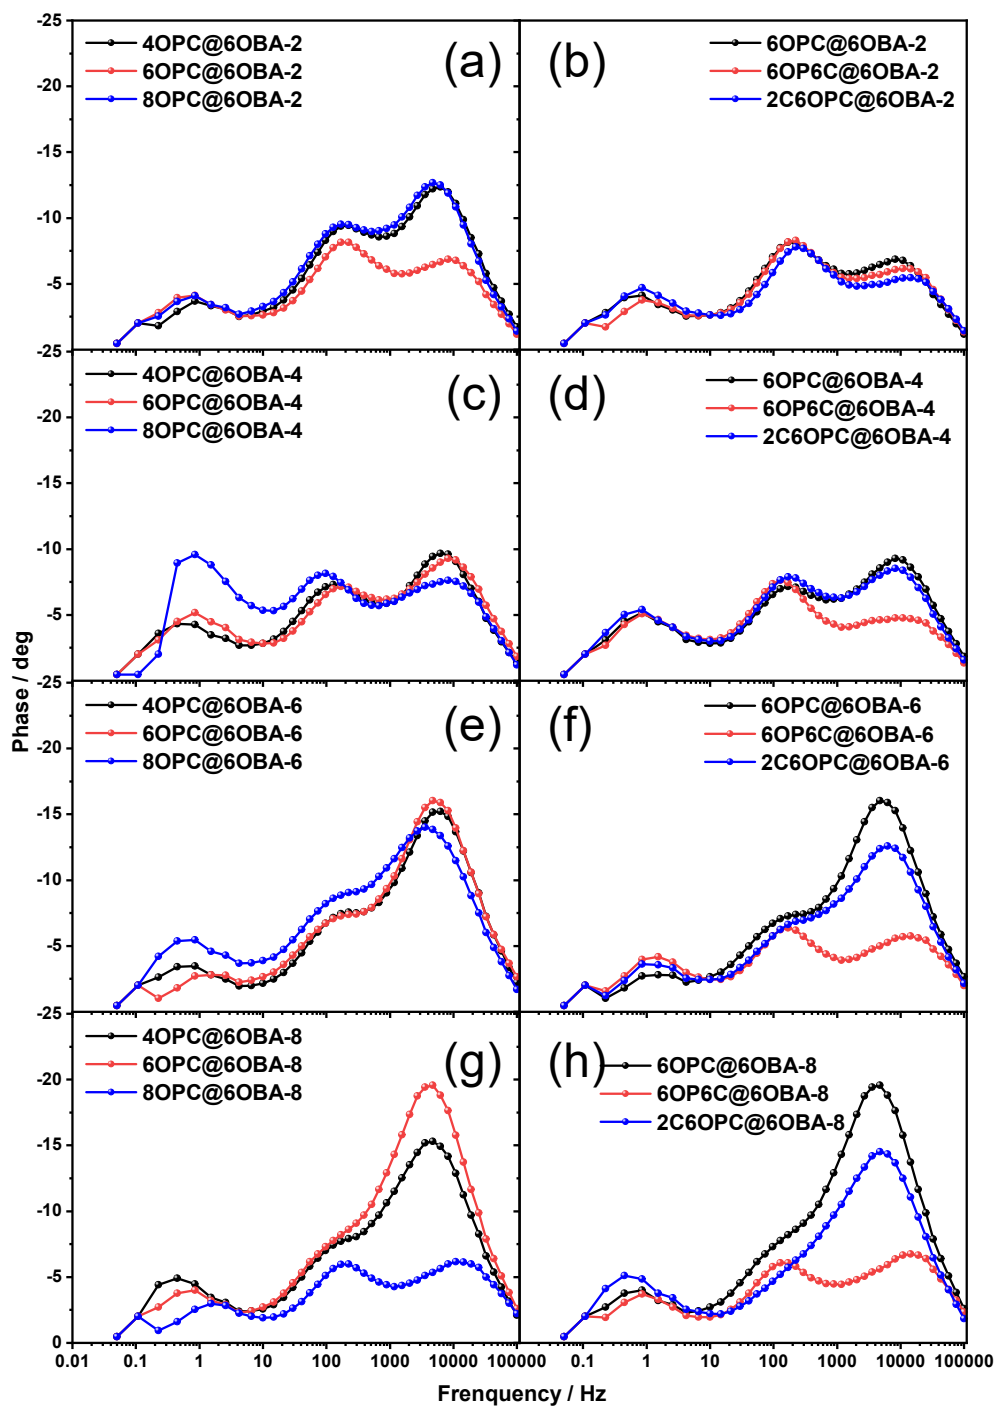

**Fig. S34.** EIS spectra for DSSCs based on sensitizers: Bode phase plots.

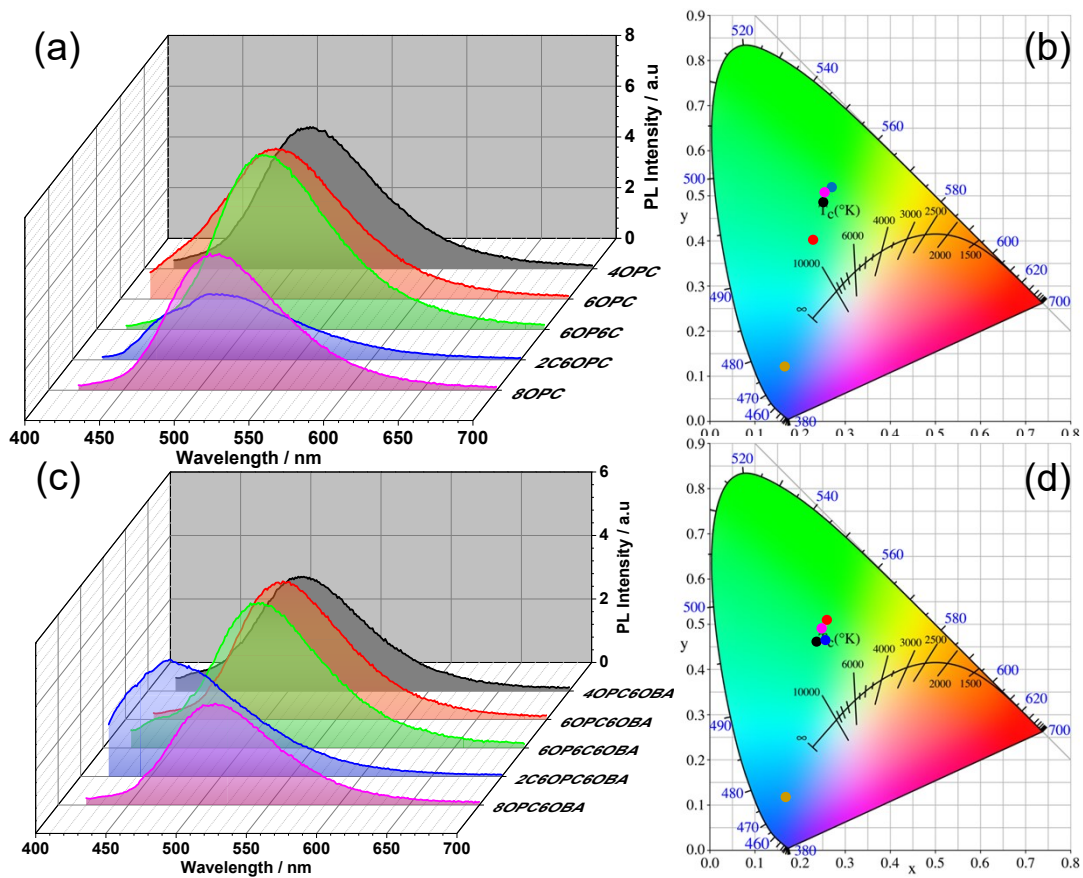

**Fig. S35.** (a) and (c) Fluorescence spectroscopy of dye sensitizers; (b) and (d) Color coordinate diagram and color coordinates of sensitizers.

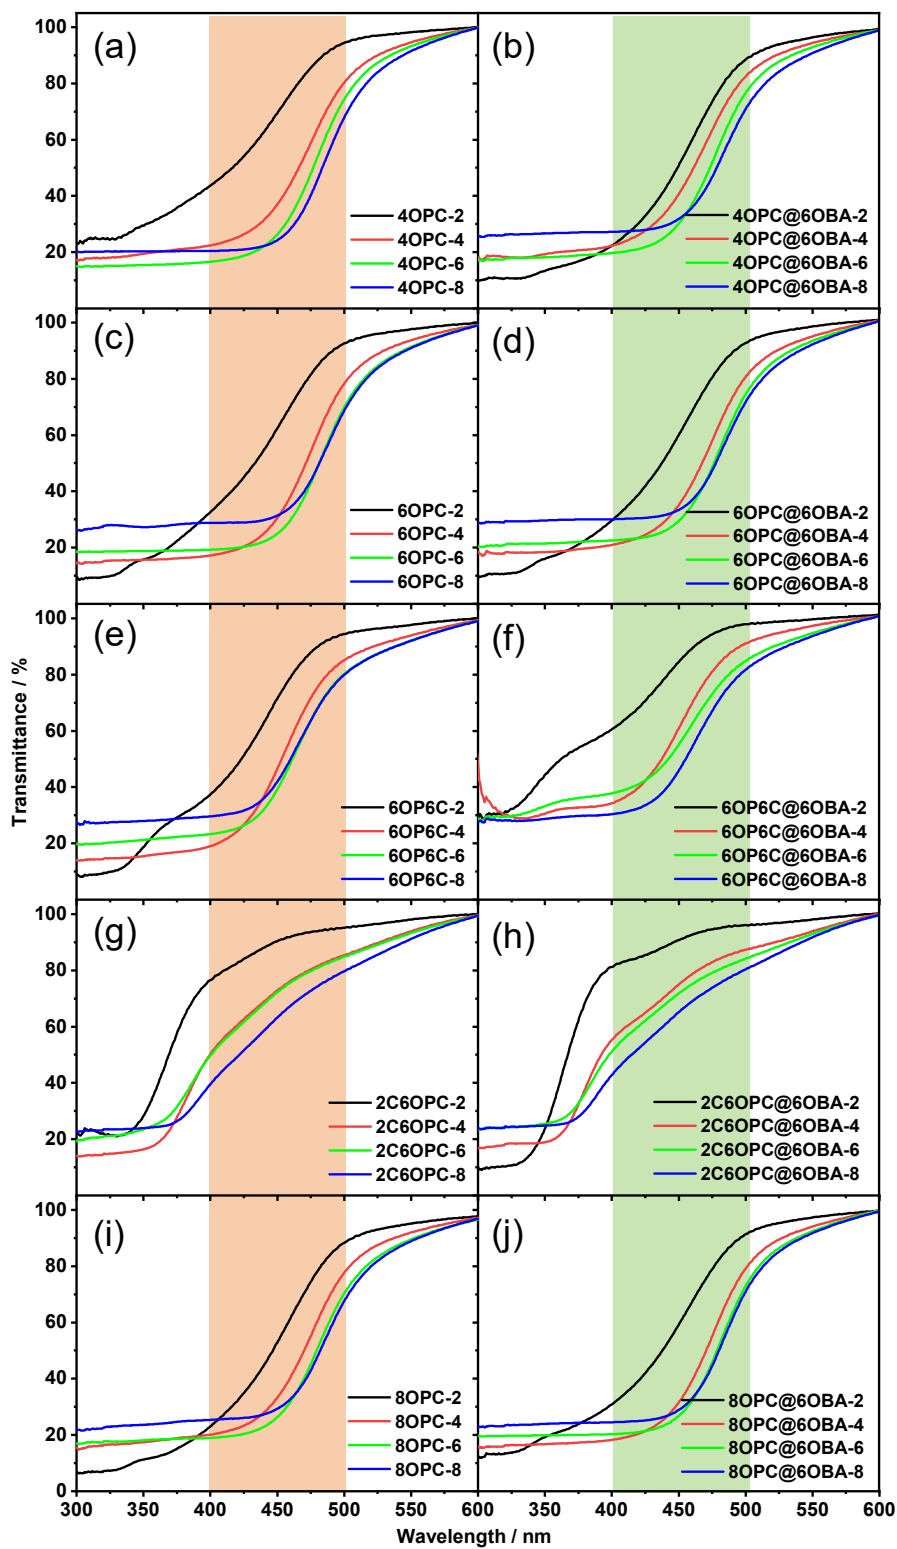

**Fig. S36.** Transmittance of dye sensitizers and co-sensitizers at different  $\text{TiO}_2$  thicknesses.

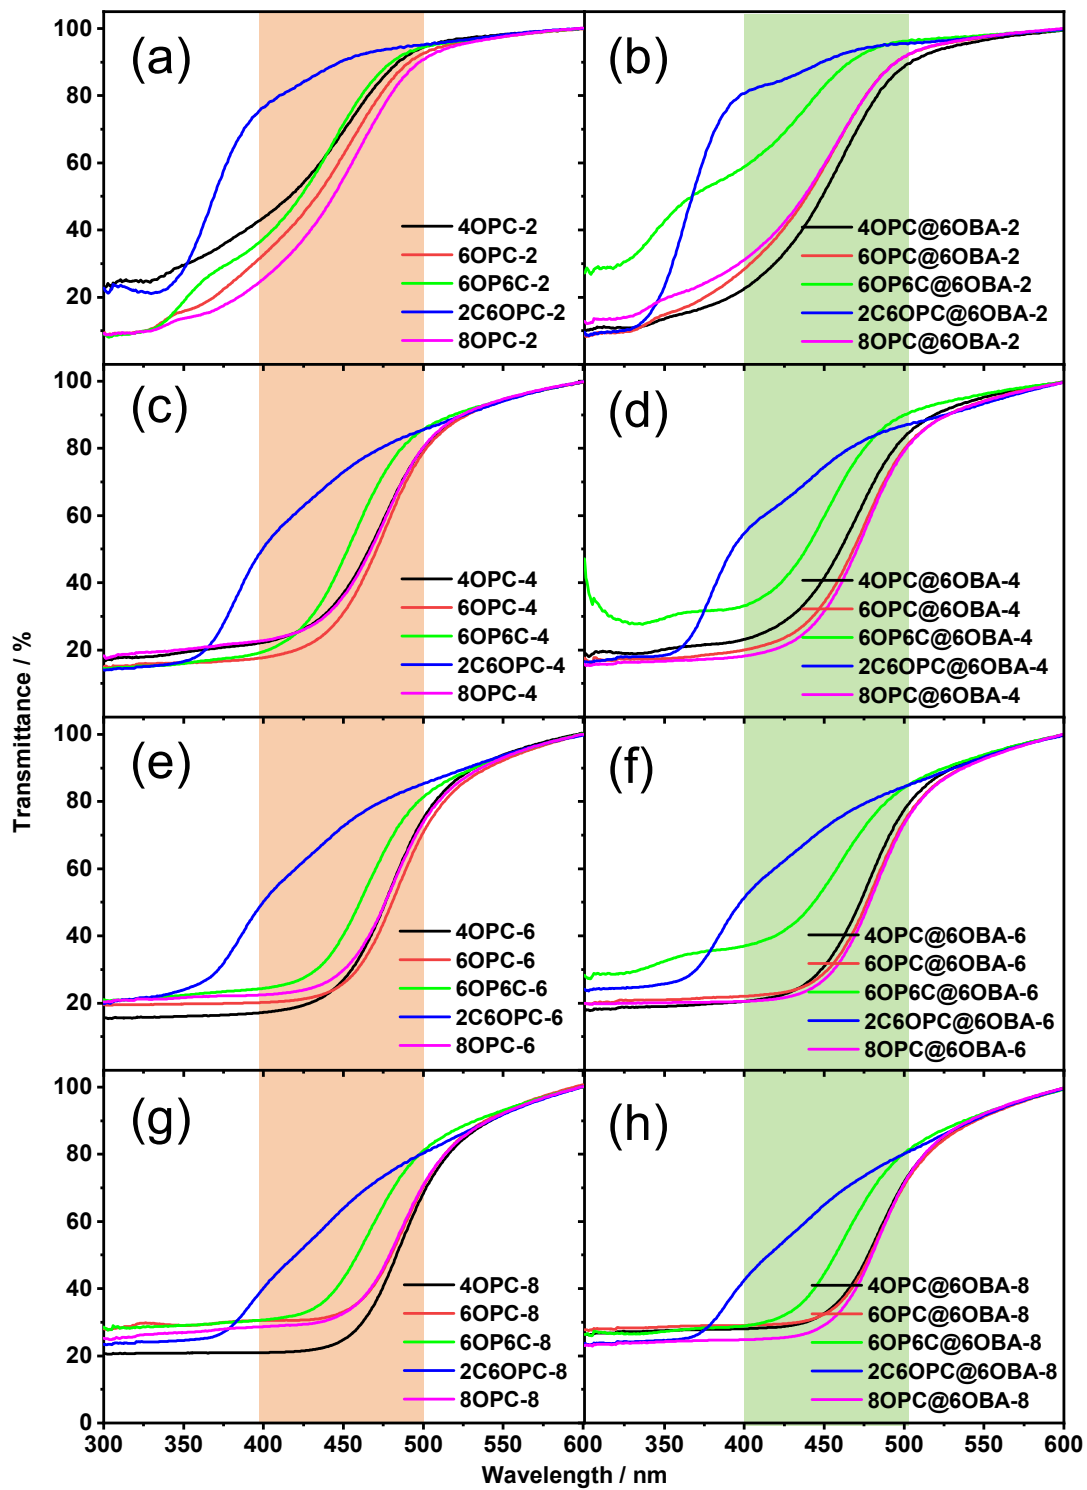

**Fig. S37.** Transmittance of dye sensitizers and co-sensitizers at different TiO<sub>2</sub> thicknesses.

## Application evaluation

The following figure shows the 1000 h durability of the DSSC devices. The results are shown in Fig. S38, Fig. S39, Table S7 and Table S8.

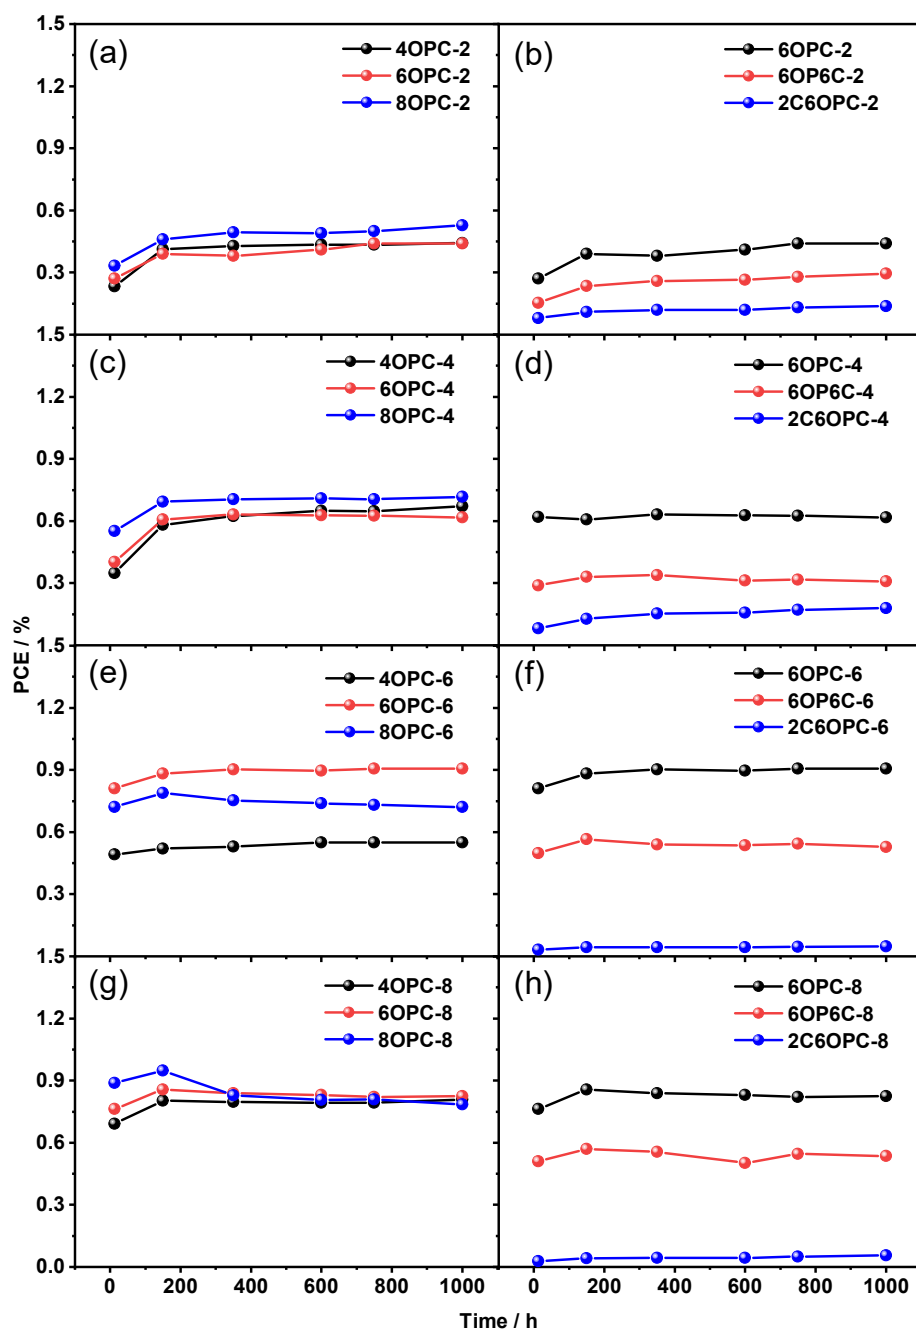

**Fig. S38.** Durability of PCE for DSSCs based on 4OPC, 6OPC, 6OP6C, 2C6OPC and 8OPC for 1000 h.

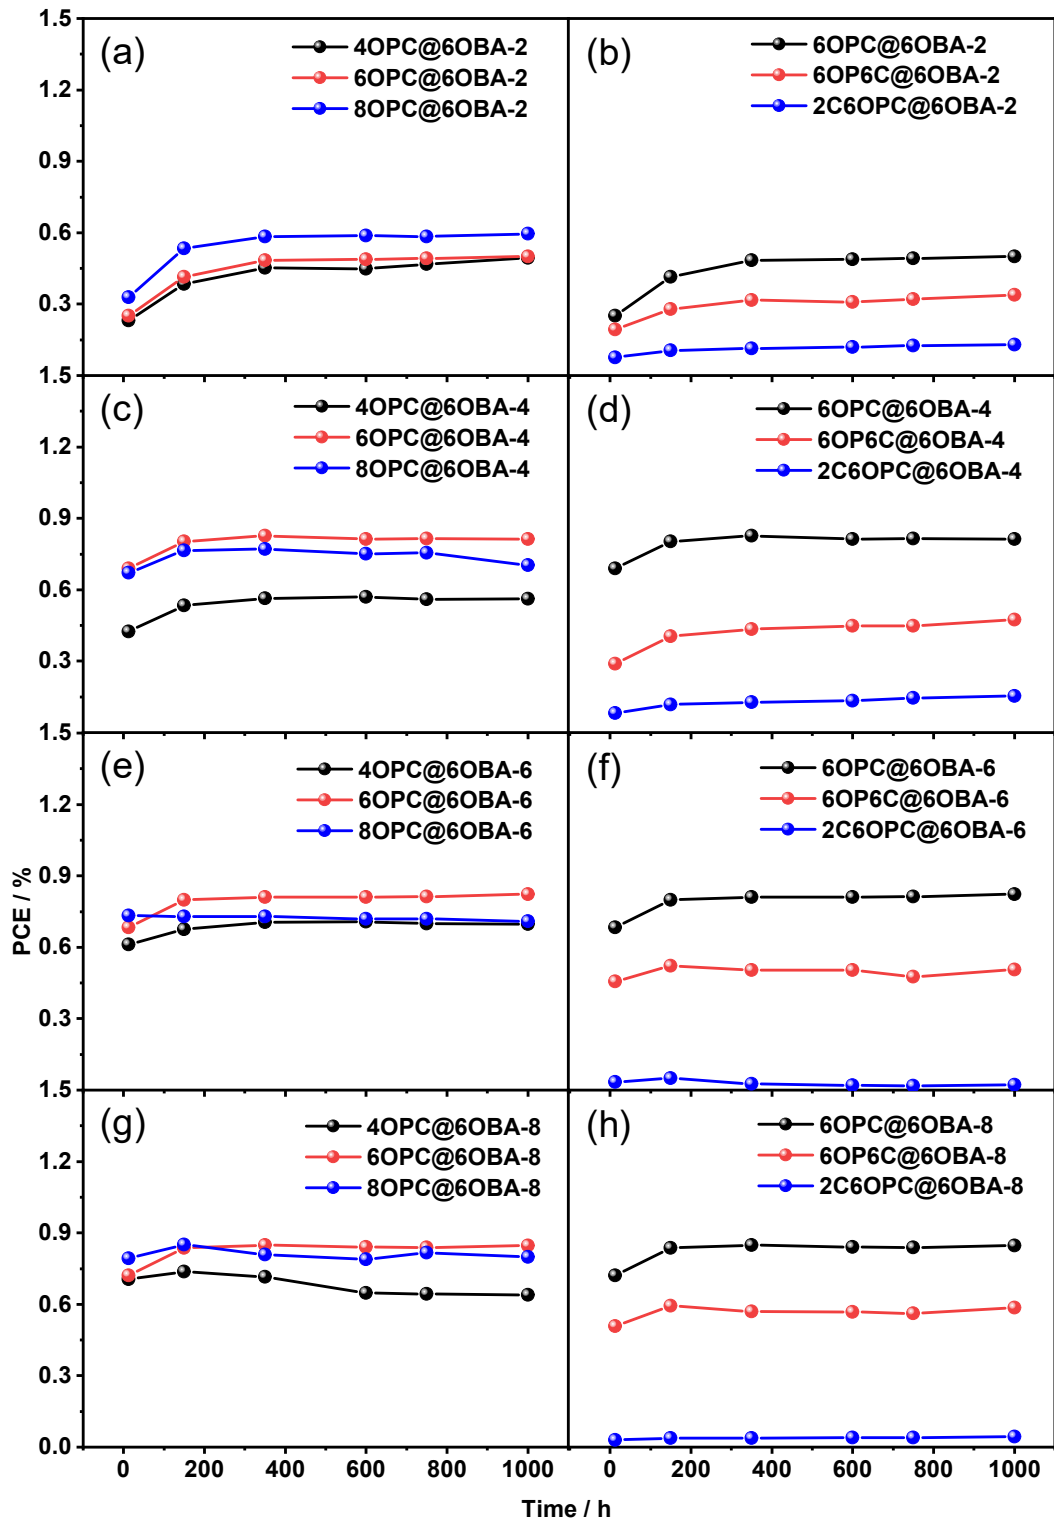

Fig. S39. Durability of PCE for DSSCs based on 4OPC@6OBA, 6OPC@6OBA, 6OP6C@6OBA, 2C6OPC@6OBA and 8OPC@6OBA for 1000 h.

**Table S1** The length ( $L$ ), height ( $H$ ) and width ( $W$ ) of the three-dimensional structures, and the ratio of  $H$  and  $W$ .

| Dye           | $L(\text{\AA})$ | $H(\text{\AA})$ | $W(\text{\AA})$ |
|---------------|-----------------|-----------------|-----------------|
| <b>4OPC</b>   | 19.81           | 6.86            | 3.42            |
| <b>6OPC</b>   | 22.37           | 6.86            | 3.61            |
| <b>6OP6C</b>  | 21.16           | 13.29           | 6.03            |
| <b>2C6OPC</b> | 21.10           | 16.25           | 3.70            |
| <b>8OPC</b>   | 24.93           | 6.86            | 3.75            |

**Table S2** Maximum UV-vis absorption spectra and  $\varepsilon$  of  $\text{TiO}_2$  film thicknesses of sensitizers and co-sensitizers.

| Dyes               | $\lambda_{\text{max}}^a/\text{nm}$ | $\varepsilon^a/\text{M}^{-1} \text{cm}^{-1}$ | $\lambda_{\text{max}}^b/\text{nm}$ | $\varepsilon^b/\text{M}^{-1} \text{cm}^{-1}$ | $\lambda_{\text{max}}^c/\text{nm}$ | $\varepsilon^c/\text{M}^{-1} \text{cm}^{-1}$ | $\lambda_{\text{max}}^d/\text{nm}$ | $\varepsilon^d/\text{M}^{-1} \text{cm}^{-1}$ |
|--------------------|------------------------------------|----------------------------------------------|------------------------------------|----------------------------------------------|------------------------------------|----------------------------------------------|------------------------------------|----------------------------------------------|
| <b>4OPC</b>        | 302                                | 118847                                       | 301                                | 136453                                       | 303                                | 178915                                       | 301                                | 168902                                       |
| <b>6OPC</b>        | 302                                | 141890                                       | 303                                | 166401                                       | 300                                | 183662                                       | 304                                | 199887                                       |
| <b>6OP6C</b>       | 301                                | 166487                                       | 302                                | 195831                                       | 304                                | 262285                                       | 303                                | 231388                                       |
| <b>2C6OPC</b>      | 301                                | 112115                                       | 305                                | 147414                                       | 303                                | 178483                                       | 303                                | 198679                                       |
| <b>8OPC</b>        | 303                                | 117207                                       | 301                                | 116344                                       | 298                                | 139905                                       | 305                                | 140941                                       |
| <b>4OPC@6OBA</b>   | 299                                | 96398                                        | 300                                | 126098                                       | 303                                | 140658                                       | 304                                | 148605                                       |
| <b>6OPC@6OBA</b>   | 298                                | 129868                                       | 303                                | 144138                                       | 303                                | 155102                                       | 300                                | 161483                                       |
| <b>6OP6C@6OBA</b>  | 304                                | 94136                                        | 302                                | 124706                                       | 305                                | 157712                                       | 302                                | 145473                                       |
| <b>2C6OPC@6OBA</b> | 301                                | 145879                                       | 301                                | 138628                                       | 303                                | 148720                                       | 303                                | 171692                                       |
| <b>8OPC@6OBA</b>   | 303                                | 116875                                       | 303                                | 156029                                       | 304                                | 157074                                       | 301                                | 123893                                       |

<sup>a</sup> Absorption maximum on 2  $\mu\text{m}$   $\text{TiO}_2$  film.

<sup>b</sup> Absorption maximum on 4  $\mu\text{m}$   $\text{TiO}_2$  film.

<sup>c</sup> Absorption maximum on 6  $\mu\text{m}$   $\text{TiO}_2$  film.

<sup>d</sup> Absorption maximum on 8  $\mu\text{m}$   $\text{TiO}_2$  film.



**Table S3** PV parameters of DSSCs based on sensitizers under one sun illumination (AM 1.5G, 100 mW cm<sup>-2</sup>).

| Devices     | thinknes<br>s/ $\mu\text{m}$ | $V_{oc}^a(V_{oc}^b)/\text{mV}$ | $J_{sc}^a(J_{sc}^b)/\text{mA cm}^{-2}$ | $FF^a(FF^b)/\%$ | $PCE^a(PCE^b)/\%$ | IPCE/ $\%$<br>( $\lambda_{max}/\text{nm}$ ) | $J_{sc}^{IPCE}/\text{mA cm}^{-2}$ |
|-------------|------------------------------|--------------------------------|----------------------------------------|-----------------|-------------------|---------------------------------------------|-----------------------------------|
| 4OPC        | 2                            | 539.1(538±7)                   | 0.6(0.7±0.1)                           | 68.5(69.3±0.6)  | 0.23(0.26±0.0)    | 41.16(339)                                  | 0.84                              |
| 6OPC        | 2                            | 549.7(551±13)                  | 0.7(0.7±0.1)                           | 70.4(70.3±0.9)  | 0.27(0.26±0.0)    | 43.56(340)                                  | 0.86                              |
| 6OP6C       | 2                            | 526.8(527±5)                   | 0.4(0.4±0.0)                           | 69.2(69.6±0.6)  | 0.15(0.16±0.0)    | 41.06(339)                                  | 0.59                              |
| 2C6OPC      | 2                            | 493.7(495±4)                   | 0.2(0.2±0.0)                           | 70.3(69.7±0.6)  | 0.08(0.08±0.0)    | 65.27(340)                                  | 0.42                              |
| 8OPC        | 2                            | 562.5(557±6)                   | 0.8(0.7±0.1)                           | 71.9(71.1±0.9)  | 0.33(0.29±0.0)    | 43.27(345)                                  | 0.94                              |
| 4OPC@6OBA   | 2                            | 564.0(553±10)                  | 0.6(0.5±0.1)                           | 70.6(69.6±0.9)  | 0.23(0.20±0.0)    | 44.47(340)                                  | 0.67                              |
| 6OPC@6OBA   | 2                            | 569.2(560±10)                  | 0.6(0.6±0.1)                           | 70.9(70.5±1.3)  | 0.25(0.25±0.1)    | 41.59(340)                                  | 0.67                              |
| 6OP6C@6OBA  | 2                            | 551.9(551±7)                   | 0.5(0.5±0.1)                           | 69.5(69.9±0.6)  | 0.19(0.20±0.0)    | 42.62(340)                                  | 0.59                              |
| 2C6OPC@6OBA | 2                            | 505.3(504±3)                   | 0.2(0.2±0.0)                           | 64.5(65.8±1.3)  | 0.08(0.08±0.0)    | 39.74(340)                                  | 0.42                              |
| 8OPC@6OBA   | 2                            | 578.1(579±6)                   | 0.8(0.8±0.0)                           | 70.7(70.8±0.4)  | 0.33(0.33±0.0)    | 43.34(340)                                  | 0.81                              |

TiO<sub>2</sub> thickness about 2  $\mu$  transparent layer and 0.25 cm<sup>2</sup>, [dye] = 0.4 mM, dipping solvent acetonitrile/tert-butanol 1:1(v/v), dipping time 12 h in the dark. <sup>a</sup>The best device parameters. <sup>b</sup>The average device parameters (obtained from five devices).

| Devices     | thinknes<br>ss/ $\mu\text{m}$ | $V_{oc}^a(V_{oc}^b)/\text{mV}$ | $J_{sc}^a(J_{sc}^b)/\text{mA cm}^{-2}$ | $FF^a(FF^b)/\%$ | $PCE^a(PCE^b)/\%$ | IPCE/ $\%$<br>( $\lambda_{max}/\text{nm}$ ) | $J_{sc}^{IPCE}/\text{mA cm}^{-2}$ |
|-------------|-------------------------------|--------------------------------|----------------------------------------|-----------------|-------------------|---------------------------------------------|-----------------------------------|
| 4OPC        | 4                             | 541.1(571±25)                  | 0.9(1.4±0.4)                           | 70.4(71.9±1.4)  | 0.35(0.60±0.2)    | 44.09(340)                                  | 1.01                              |
| 6OPC        | 4                             | 552.1(567±14)                  | 1.0(1.4±0.3)                           | 72.8(72.7±0.4)  | 0.40(0.57±0.1)    | 45.07(340)                                  | 1.11                              |
| 6OP6C       | 4                             | 542.9(549±16)                  | 0.7(0.8±0.1)                           | 70.2(70.9±1.5)  | 0.23(0.33±0.1)    | 42.89(340)                                  | 0.88                              |
| 2C6OPC      | 4                             | 483.0(469±19)                  | 0.2(0.2±0.0)                           | 69.0(64.6±6.6)  | 0.08(0.08±0.0)    | 71.56(340)                                  | 0.43                              |
| 8OPC        | 4                             | 567.9(569±19)                  | 1.3(1.4±0.4)                           | 72.9(71.9±1.9)  | 0.55(0.60±0.2)    | 44.35(339)                                  | 1.33                              |
| 4OPC@6OBA   | 4                             | 584.9(598±12)                  | 1.0(1.5±0.3)                           | 70.5(72.5±1.4)  | 0.42(0.64±0.2)    | 41.32(350)                                  | 1.36                              |
| 6OPC@6OBA   | 4                             | 586.1(601±14)                  | 1.6(1.7±0.2)                           | 71.9(72.3±0.2)  | 0.69(0.72±0.1)    | 48.73(360)                                  | 1.82                              |
| 6OP6C@6OBA  | 4                             | 559.8(580±17)                  | 0.7(0.9±0.2)                           | 71.8(72.4±0.4)  | 0.29(0.41±0.1)    | 37.96(340)                                  | 0.89                              |
| 2C6OPC@6OBA | 4                             | 508.3(496±13)                  | 0.2(0.3±0.0)                           | 67.2(63.6±6.5)  | 0.08(0.08±0.0)    | 35.62(340)                                  | 0.41                              |
| 8OPC@6OBA   | 4                             | 609.9(614±6)                   | 1.5(1.7±0.2)                           | 73.3(72.7±0.9)  | 0.67(0.76±0.1)    | 45.46(350)                                  | 1.66                              |

TiO<sub>2</sub> thickness about 4  $\mu$  transparent layer and 0.25 cm<sup>2</sup>, [dye] = 0.4 mM, dipping solvent acetonitrile/tert-butanol 1:1(v/v), dipping time 12 h in the dark. <sup>a</sup>The best device parameters. <sup>b</sup>The average device parameters (obtained from five devices).

| Devices     | thinknes<br>s/ $\mu\text{m}$ | $V_{oc}^a(V_{oc}^b)/\text{mV}$ | $J_{sc}^a(J_{sc}^b)/\text{mA cm}^{-2}$ | $FF^a(FF^b)/\%$ | $PCE^a(PCE^b)/\%$ | IPCE/ $\%$<br>( $\lambda_{max}/\text{nm}$ ) | $J_{sc}^{IPCE}/\text{mA cm}^{-2}$ |
|-------------|------------------------------|--------------------------------|----------------------------------------|-----------------|-------------------|---------------------------------------------|-----------------------------------|
| 4OPC        | 6                            | 585.3(586±6)                   | 1.3(1.2±0.2)                           | 65.4(65.7±0.9)  | 0.49(0.47±0.1)    | 47.39(359)                                  | 1.55                              |
| 6OPC        | 6                            | 624.6(625±6)                   | 1.6(1.9±0.0)                           | 70.1(70.2±0.3)  | 0.68(0.82±0.0)    | 48.29(350)                                  | 1.87                              |
| 6OP6C       | 6                            | 607.9(593±19)                  | 1.2(1.2±0.0)                           | 70.7(70.0±0.5)  | 0.50(0.48±0.0)    | 37.64(345)                                  | 1.21                              |
| 2C6OPC      | 6                            | 419.4(414±7)                   | 0.1(0.1±0.0)                           | 57.4(43.2±16)   | 0.03(0.02±0.0)    | 34.27(335)                                  | 0.31                              |
| 8OPC        | 6                            | 626.4(607±12)                  | 1.6(1.5±0.2)                           | 71.0(69.4±1.5)  | 0.72(0.61±0.1)    | 47.41(350)                                  | 1.70                              |
| 4OPC@6OBA   | 6                            | 618.3(625±7)                   | 1.5(1.6±0.1)                           | 64.6(66.4±1.9)  | 0.61(0.65±0.0)    | 42.19(359)                                  | 1.56                              |
| 6OPC@6OBA   | 6                            | 612.9(625±7)                   | 1.6(1.8±0.2)                           | 67.9(66.5±2.4)  | 0.68(0.73±0.1)    | 45.97(350)                                  | 1.69                              |
| 6OP6C@6OBA  | 6                            | 603.5(606±19)                  | 1.1(1.1±0.0)                           | 71.2(70.6±0.4)  | 0.46(0.46±0.0)    | 38.29(350)                                  | 1.26                              |
| 2C6OPC@6OBA | 6                            | 459.8(447±11)                  | 0.1(0.1±0.0)                           | 52.5(53.7±2.2)  | 0.03(0.03±0.0)    | 36.63(340)                                  | 0.32                              |
| 8OPC@6OBA   | 6                            | 624.9(637±9)                   | 1.8(1.8±0.3)                           | 65.3(67.9±2.4)  | 0.73(0.78±0.1)    | 45.77(350)                                  | 1.68                              |

TiO<sub>2</sub> thickness about 6  $\mu$  transparent layer and 0.25 cm<sup>2</sup>, [dye] = 0.4 mM, dipping solvent acetonitrile/tert-butanol 1:1(v/v), dipping time 12 h in the dark. <sup>a</sup>The best device parameters. <sup>b</sup>The average device parameters (obtained from five devices).

**Table S4** PV parameters of DSSCs based on sensitizers under UVA LED radiation (365 nm, 150  $\mu\text{W cm}^{-2}$ ).

| Devices     | thickness/ $\mu\text{m}$ | $V_{oc}/\text{mV}$ | $J_{sc}/\text{mA cm}^{-2}$ | $FF/\%$ | PCE/ $\%$ |
|-------------|--------------------------|--------------------|----------------------------|---------|-----------|
| 4OPC        | 2                        | 409.69             | 0.02                       | 63.34   | 3.81      |
| 6OPC        | 2                        | 437.39             | 0.02                       | 59.76   | 4.05      |
| 6OP6C       | 2                        | 409.34             | 0.02                       | 58.93   | 2.49      |
| 2C6OPC      | 2                        | 391.89             | 0.01                       | 58.53   | 1.80      |
| 8OPC        | 2                        | 433.47             | 0.02                       | 56.89   | 3.65      |
| 4OPC@6OBA   | 2                        | 439.73             | 0.02                       | 57.93   | 2.84      |
| 6OPC@6OBA   | 2                        | 441.63             | 0.02                       | 60.02   | 3.36      |
| 6OP6C@6OBA  | 2                        | 402.27             | 0.02                       | 53.21   | 2.45      |
| 2C6OPC@6OBA | 2                        | 364.85             | 0.01                       | 53.29   | 1.34      |
| 8OPC@6OBA   | 2                        | 458.72             | 0.03                       | 58.97   | 4.67      |

| Devices     | thickness/ $\mu\text{m}$ | $V_{oc}/\text{mV}$ | $J_{sc}/\text{mA cm}^{-2}$ | $FF/\%$ | PCE/ $\%$ |
|-------------|--------------------------|--------------------|----------------------------|---------|-----------|
| 4OPC        | 4                        | 425.72             | 0.03                       | 58.58   | 4.41      |
| 6OPC        | 4                        | 438.85             | 0.03                       | 63.37   | 4.77      |
| 6OP6C       | 4                        | 416.44             | 0.02                       | 55.92   | 3.29      |
| 2C6OPC      | 4                        | 354.40             | 0.01                       | 60.82   | 1.54      |
| 8OPC        | 4                        | 439.09             | 0.03                       | 60.06   | 4.55      |
| 4OPC@6OBA   | 4                        | 442.27             | 0.02                       | 60.40   | 4.18      |
| 6OPC@6OBA   | 4                        | 434.43             | 0.03                       | 57.41   | 5.39      |
| 6OP6C@6OBA  | 4                        | 425.97             | 0.02                       | 60.48   | 3.53      |
| 2C6OPC@6OBA | 4                        | 341.65             | 0.01                       | 53.79   | 1.29      |
| 8OPC@6OBA   | 4                        | 478.82             | 0.03                       | 60.91   | 6.71      |

| Devices     | thickness/ $\mu\text{m}$ | $V_{oc}/\text{mV}$ | $J_{sc}/\text{mA cm}^{-2}$ | $FF/\%$ | PCE/ $\%$ |
|-------------|--------------------------|--------------------|----------------------------|---------|-----------|
| 4OPC        | 6                        | 409.33             | 0.04                       | 52.61   | 5.23      |
| 6OPC        | 6                        | 393.57             | 0.04                       | 52.43   | 5.08      |
| 6OP6C       | 6                        | 423.89             | 0.02                       | 53.37   | 3.72      |
| 2C6OPC      | 6                        | 251.19             | 0.01                       | 51.45   | 0.52      |
| 8OPC        | 6                        | 444.98             | 0.03                       | 52.48   | 5.37      |
| 4OPC@6OBA   | 6                        | 425.08             | 0.03                       | 53.94   | 4.31      |
| 6OPC@6OBA   | 6                        | 421.34             | 0.03                       | 51.96   | 4.90      |
| 6OP6C@6OBA  | 6                        | 413.30             | 0.03                       | 50.80   | 3.61      |
| 2C6OPC@6OBA | 6                        | 264.22             | 0.01                       | 52.49   | 0.54      |
| 8OPC@6OBA   | 6                        | 438.89             | 0.03                       | 51.64   | 4.88      |

**Table S5** Electrochemical impedance parameters for DSSCs devices.

| Devices<br>thickness/ $\mu\text{m}$ | $f/\text{Hz}$ |      |      |      | $\tau_e/\text{ms}$ |      |      |      |
|-------------------------------------|---------------|------|------|------|--------------------|------|------|------|
|                                     | 2             | 4    | 6    | 8    | 2                  | 4    | 6    | 8    |
| <b>4OPC</b>                         | 0.44          | 0.24 | 0.46 | 0.79 | 0.36               | 0.66 | 0.35 | 0.20 |
| <b>6OPC</b>                         | 0.23          | 0.44 | 0.45 | 0.80 | 0.69               | 0.36 | 0.35 | 0.20 |
| <b>6OP6C</b>                        | 0.24          | 0.43 | 0.44 | 0.78 | 0.66               | 0.37 | 0.36 | 0.20 |
| <b>2C6OPC</b>                       | 0.21          | 0.22 | 0.46 | 0.58 | 0.76               | 0.72 | 0.35 | 0.27 |
| <b>8OPC</b>                         | 0.73          | 1.47 | 0.84 | 0.75 | 0.22               | 0.11 | 0.19 | 0.21 |
| <b>4OPC@6OBA</b>                    | 0.84          | 0.56 | 0.67 | 0.44 | 0.19               | 0.28 | 0.24 | 0.36 |
| <b>6OPC@6OBA</b>                    | 0.68          | 0.81 | 1.51 | 0.75 | 0.23               | 0.19 | 0.11 | 0.21 |
| <b>6OP6C@6OBA</b>                   | 0.84          | 0.88 | 1.45 | 0.83 | 0.19               | 0.18 | 0.11 | 0.19 |
| <b>2C6OPC@6OBA</b>                  | 0.81          | 0.83 | 1.04 | 0.48 | 0.19               | 0.19 | 0.15 | 0.13 |
| <b>8OPC@6OBA</b>                    | 0.80          | 0.84 | 0.72 | 1.56 | 0.20               | 0.19 | 0.22 | 0.10 |

**Table S6** CIE 1931 color coordinates and correlated color temperature (CCT) of organic dyes.

| Dyes                                           | CIE x  | CIE y  | Peak | n       | CCT       |
|------------------------------------------------|--------|--------|------|---------|-----------|
| <b>I<sub>3</sub><sup>-</sup>/I<sup>-</sup></b> | 0.1625 | 0.1012 | 429  | -2.0035 | 2388.2955 |
| <b>4OPC</b>                                    | 0.2534 | 0.4841 | 580  | 0.2635  | 7571.1213 |
| <b>6OPC</b>                                    | 0.2277 | 0.4014 | 444  | 0.4838  | 9697.4718 |
| <b>6OP6C</b>                                   | 0.2661 | 0.5146 | 364  | 0.2004  | 7033.0612 |
| <b>2C6OPC</b>                                  | 0.1671 | 0.1182 | 580  | -2.4393 | 3333.7886 |
| <b>8OPC</b>                                    | 0.2567 | 0.5068 | 580  | 0.2346  | 7320.7433 |
| <b>4OPC@6OBA</b>                               | 0.2458 | 0.4614 | 507  | 0.3128  | 8013.1426 |
| <b>6OPC@6OBA</b>                               | 0.2567 | 0.5034 | 512  | 0.2371  | 7342.2111 |
| <b>6OP6C@6OBA</b>                              | 0.2534 | 0.4636 | 513  | 0.2829  | 7742.7890 |
| <b>2C6OPC@6OBA</b>                             | 0.1671 | 0.1176 | 409  | -2.4179 | 3283.2435 |
| <b>8OPC@6OBA</b>                               | 0.2540 | 0.4929 | 512  | 0.2539  | 7478.1395 |

**Table S7** Durability data of  $V_{oc}$ ,  $J_{sc}$ ,  $FF$ , PCE for DSSCs devices under one sun illumination (AM 1.5G, 100 mW cm<sup>-2</sup>).

| Devices       | Thickness/ $\mu\text{m}$ | Time/h | $V_{oc}/\text{mV}$ | $J_{sc}/\text{mA cm}^{-2}$ | $FF/\%$ | PCE/ $\%$ |
|---------------|--------------------------|--------|--------------------|----------------------------|---------|-----------|
| <b>4OPC</b>   | 2                        | 12     | 539.14             | 0.63                       | 68.49   | 0.23      |
|               | 2                        | 150    | 580.66             | 1.00                       | 70.91   | 0.41      |
|               | 2                        | 350    | 562.80             | 1.06                       | 71.67   | 0.43      |
|               | 2                        | 600    | 566.39             | 1.07                       | 71.83   | 0.44      |
|               | 2                        | 750    | 563.52             | 1.07                       | 72.06   | 0.43      |
|               | 2                        | 1000   | 580.96             | 1.04                       | 73.39   | 0.44      |
| <b>6OPC</b>   | 2                        | 12     | 549.68             | 0.70                       | 70.36   | 0.27      |
|               | 2                        | 150    | 583.82             | 0.95                       | 70.10   | 0.39      |
|               | 2                        | 350    | 575.00             | 1.07                       | 67.73   | 0.38      |
|               | 2                        | 600    | 554.59             | 1.06                       | 71.09   | 0.41      |
|               | 2                        | 750    | 565.66             | 1.09                       | 71.57   | 0.44      |
|               | 2                        | 1000   | 571.97             | 1.10                       | 69.68   | 0.44      |
| <b>6OP6C</b>  | 2                        | 12     | 526.83             | 0.42                       | 69.21   | 0.15      |
|               | 2                        | 150    | 558.90             | 0.59                       | 70.44   | 0.23      |
|               | 2                        | 350    | 547.76             | 0.67                       | 70.80   | 0.26      |
|               | 2                        | 600    | 543.35             | 0.68                       | 71.30   | 0.26      |
|               | 2                        | 750    | 541.95             | 0.72                       | 71.96   | 0.28      |
|               | 2                        | 1000   | 566.30             | 0.72                       | 72.34   | 0.29      |
| <b>2C6OPC</b> | 2                        | 12     | 493.69             | 0.23                       | 70.33   | 0.08      |
|               | 2                        | 150    | 524.77             | 0.30                       | 70.63   | 0.11      |
|               | 2                        | 350    | 513.91             | 0.34                       | 69.10   | 0.12      |
|               | 2                        | 600    | 499.93             | 0.34                       | 69.16   | 0.12      |
|               | 2                        | 750    | 506.86             | 0.37                       | 70.02   | 0.13      |
|               | 2                        | 1000   | 528.97             | 0.37                       | 71.01   | 0.14      |
| <b>8OPC</b>   | 2                        | 12     | 562.49             | 0.82                       | 71.90   | 0.33      |
|               | 2                        | 150    | 589.95             | 1.07                       | 72.59   | 0.46      |
|               | 2                        | 350    | 570.64             | 1.19                       | 72.77   | 0.49      |
|               | 2                        | 600    | 559.36             | 1.20                       | 72.98   | 0.49      |
|               | 2                        | 750    | 552.92             | 1.24                       | 72.92   | 0.50      |
|               | 2                        | 1000   | 582.45             | 1.23                       | 73.76   | 0.53      |
| <b>4OPC</b>   | 4                        | 12     | 541.08             | 0.92                       | 70.39   | 0.35      |
|               | 4                        | 150    | 580.23             | 1.40                       | 71.52   | 0.58      |
|               | 4                        | 350    | 570.38             | 1.53                       | 71.52   | 0.62      |
|               | 4                        | 600    | 572.36             | 1.58                       | 72.01   | 0.65      |
|               | 4                        | 750    | 551.27             | 1.61                       | 72.82   | 0.65      |
|               | 4                        | 1000   | 570.46             | 1.61                       | 73.17   | 0.67      |
| <b>6OPC</b>   | 4                        | 12     | 576.73             | 1.50                       | 72.33   | 0.62      |
|               | 4                        | 150    | 582.37             | 1.43                       | 72.84   | 0.61      |
|               | 4                        | 350    | 564.80             | 1.54                       | 72.63   | 0.63      |
|               | 4                        | 600    | 551.09             | 1.56                       | 72.95   | 0.63      |
|               | 4                        | 750    | 527.57             | 1.62                       | 73.15   | 0.63      |
|               | 4                        | 1000   | 544.19             | 1.53                       | 74.08   | 0.62      |
| <b>6OP6C</b>  | 4                        | 12     | 542.91             | 0.76                       | 70.19   | 0.29      |

|               |   |      |        |      |       |      |
|---------------|---|------|--------|------|-------|------|
|               | 4 | 150  | 567.91 | 0.82 | 70.41 | 0.33 |
|               | 4 | 350  | 561.13 | 0.86 | 70.27 | 0.34 |
|               | 4 | 600  | 563.21 | 0.80 | 69.39 | 0.31 |
|               | 4 | 750  | 561.84 | 0.81 | 69.88 | 0.32 |
|               | 4 | 1000 | 571.28 | 0.77 | 69.84 | 0.31 |
| <b>2C6OPC</b> | 4 | 12   | 483.02 | 0.24 | 69.03 | 0.08 |
|               | 4 | 150  | 518.87 | 0.36 | 68.27 | 0.13 |
|               | 4 | 350  | 520.25 | 0.44 | 67.33 | 0.15 |
|               | 4 | 600  | 509.58 | 0.44 | 70.36 | 0.16 |
|               | 4 | 750  | 510.78 | 0.47 | 71.24 | 0.17 |
|               | 4 | 1000 | 524.65 | 0.48 | 71.77 | 0.18 |
| <b>8OPC</b>   | 4 | 12   | 567.91 | 1.33 | 72.96 | 0.55 |
|               | 4 | 150  | 588.37 | 1.63 | 72.42 | 0.69 |
|               | 4 | 350  | 560.77 | 1.72 | 73.05 | 0.71 |
|               | 4 | 600  | 555.60 | 1.74 | 73.19 | 0.71 |
|               | 4 | 750  | 541.57 | 1.78 | 73.01 | 0.70 |
|               | 4 | 1000 | 562.01 | 1.73 | 73.75 | 0.72 |
| <b>4OPC</b>   | 6 | 12   | 585.29 | 1.28 | 65.40 | 0.49 |
|               | 6 | 150  | 609.14 | 1.29 | 66.31 | 0.52 |
|               | 6 | 350  | 565.09 | 1.37 | 68.87 | 0.53 |
|               | 6 | 600  | 599.45 | 1.37 | 67.66 | 0.55 |
|               | 6 | 750  | 567.65 | 1.49 | 69.90 | 0.55 |
|               | 6 | 1000 | 614.05 | 1.38 | 68.47 | 0.55 |
| <b>6OPC</b>   | 6 | 12   | 624.61 | 1.85 | 70.08 | 0.81 |
|               | 6 | 150  | 641.43 | 1.94 | 71.05 | 0.88 |
|               | 6 | 350  | 626.92 | 2.01 | 71.59 | 0.90 |
|               | 6 | 600  | 634.02 | 1.97 | 71.91 | 0.90 |
|               | 6 | 750  | 626.11 | 1.99 | 72.60 | 0.91 |
|               | 6 | 1000 | 646.20 | 1.91 | 73.58 | 0.91 |
| <b>6OP6C</b>  | 6 | 12   | 607.85 | 1.16 | 70.69 | 0.50 |
|               | 6 | 150  | 627.48 | 1.26 | 71.77 | 0.57 |
|               | 6 | 350  | 608.49 | 1.24 | 71.85 | 0.54 |
|               | 6 | 600  | 614.64 | 1.21 | 72.33 | 0.54 |
|               | 6 | 750  | 613.91 | 1.23 | 72.04 | 0.54 |
|               | 6 | 1000 | 624.84 | 1.15 | 73.21 | 0.53 |
| <b>2C6OPC</b> | 6 | 12   | 419.39 | 0.13 | 57.39 | 0.03 |
|               | 6 | 150  | 478.72 | 0.16 | 58.20 | 0.04 |
|               | 6 | 350  | 474.05 | 0.17 | 55.55 | 0.04 |
|               | 6 | 600  | 474.86 | 0.17 | 56.18 | 0.04 |
|               | 6 | 750  | 480.66 | 0.17 | 58.95 | 0.05 |
|               | 6 | 1000 | 496.54 | 0.17 | 59.51 | 0.05 |
| <b>8OPC</b>   | 6 | 12   | 626.37 | 1.62 | 71.04 | 0.72 |
|               | 6 | 150  | 636.35 | 1.74 | 71.24 | 0.79 |
|               | 6 | 350  | 618.56 | 1.70 | 71.57 | 0.75 |
|               | 6 | 600  | 621.00 | 1.65 | 72.13 | 0.74 |
|               | 6 | 750  | 618.65 | 1.63 | 72.43 | 0.73 |
|               | 6 | 1000 | 630.04 | 1.57 | 72.99 | 0.72 |
| <b>4OPC</b>   | 8 | 12   | 604.76 | 1.65 | 69.06 | 0.69 |
|               | 8 | 150  | 619.47 | 1.85 | 70.18 | 0.80 |

|               |   |      |        |      |       |      |
|---------------|---|------|--------|------|-------|------|
|               | 8 | 350  | 606.02 | 1.86 | 70.58 | 0.80 |
|               | 8 | 600  | 604.30 | 1.85 | 71.09 | 0.79 |
|               | 8 | 750  | 598.59 | 1.85 | 71.50 | 0.79 |
|               | 8 | 1000 | 612.19 | 1.83 | 72.17 | 0.81 |
| <b>6OPC</b>   | 8 | 12   | 630.07 | 1.71 | 71.05 | 0.76 |
|               | 8 | 150  | 644.51 | 1.86 | 71.60 | 0.86 |
|               | 8 | 350  | 629.96 | 1.86 | 71.45 | 0.84 |
|               | 8 | 600  | 635.26 | 1.82 | 71.89 | 0.83 |
|               | 8 | 750  | 625.09 | 1.81 | 72.42 | 0.82 |
|               | 8 | 1000 | 647.20 | 1.76 | 72.51 | 0.83 |
| <b>6OP6C</b>  | 8 | 12   | 616.20 | 1.17 | 70.92 | 0.51 |
|               | 8 | 150  | 632.67 | 1.25 | 71.80 | 0.57 |
|               | 8 | 350  | 613.92 | 1.26 | 72.00 | 0.56 |
|               | 8 | 600  | 612.78 | 1.14 | 71.72 | 0.50 |
|               | 8 | 750  | 605.38 | 1.24 | 72.80 | 0.54 |
|               | 8 | 1000 | 610.88 | 1.19 | 73.67 | 0.54 |
| <b>2C6OPC</b> | 8 | 12   | 425.39 | 0.13 | 52.60 | 0.03 |
|               | 8 | 150  | 478.42 | 0.16 | 56.03 | 0.04 |
|               | 8 | 350  | 469.98 | 0.17 | 56.82 | 0.04 |
|               | 8 | 600  | 449.84 | 0.17 | 57.68 | 0.04 |
|               | 8 | 750  | 460.67 | 0.19 | 58.59 | 0.05 |
|               | 8 | 1000 | 501.91 | 0.18 | 60.64 | 0.06 |
| <b>8OPC</b>   | 8 | 12   | 646.26 | 1.92 | 71.59 | 0.89 |
|               | 8 | 150  | 645.71 | 2.03 | 72.27 | 0.95 |
|               | 8 | 350  | 616.74 | 1.91 | 70.31 | 0.83 |
|               | 8 | 600  | 620.47 | 1.84 | 70.69 | 0.81 |
|               | 8 | 750  | 620.83 | 1.83 | 71.21 | 0.81 |
|               | 8 | 1000 | 630.97 | 1.74 | 71.33 | 0.78 |

---

**Table S8** Durability data of  $V_{oc}$ ,  $J_{sc}$ ,  $FF$ , PCE for DSSCs devices under one sun illumination (AM 1.5G, 100 mW cm<sup>-2</sup>).

| Devices            | Thickness/ $\mu\text{m}$ | Time/h | $V_{oc}/\text{mV}$ | $J_{sc}/\text{mA cm}^{-2}$ | $FF/\%$ | PCE/% |
|--------------------|--------------------------|--------|--------------------|----------------------------|---------|-------|
| <b>4OPC@6OBA</b>   | 2                        | 12     | 564.00             | 0.58                       | 70.60   | 0.23  |
|                    | 2                        | 150    | 592.19             | 0.90                       | 72.23   | 0.38  |
|                    | 2                        | 350    | 578.83             | 1.07                       | 73.06   | 0.45  |
|                    | 2                        | 600    | 577.01             | 1.06                       | 73.71   | 0.45  |
|                    | 2                        | 750    | 567.32             | 1.12                       | 73.56   | 0.47  |
|                    | 2                        | 1000   | 588.40             | 1.13                       | 74.15   | 0.49  |
| <b>6OPC@6OBA</b>   | 2                        | 12     | 569.23             | 0.62                       | 70.85   | 0.25  |
|                    | 2                        | 150    | 595.78             | 0.97                       | 71.95   | 0.41  |
|                    | 2                        | 350    | 583.05             | 1.14                       | 72.96   | 0.48  |
|                    | 2                        | 600    | 575.63             | 1.16                       | 72.93   | 0.49  |
|                    | 2                        | 750    | 570.99             | 1.18                       | 73.37   | 0.49  |
|                    | 2                        | 1000   | 576.66             | 1.18                       | 73.55   | 0.50  |
| <b>6OP6C@6OBA</b>  | 2                        | 12     | 551.87             | 0.50                       | 69.49   | 0.19  |
|                    | 2                        | 150    | 572.36             | 0.70                       | 69.74   | 0.28  |
|                    | 2                        | 350    | 552.67             | 0.83                       | 69.55   | 0.32  |
|                    | 2                        | 600    | 549.18             | 0.80                       | 69.88   | 0.31  |
|                    | 2                        | 750    | 541.92             | 0.85                       | 69.83   | 0.32  |
|                    | 2                        | 1000   | 564.83             | 0.86                       | 70.12   | 0.34  |
| <b>2C6OPC@6OBA</b> | 2                        | 12     | 505.29             | 0.23                       | 64.46   | 0.08  |
|                    | 2                        | 150    | 527.96             | 0.30                       | 66.34   | 0.11  |
|                    | 2                        | 350    | 518.19             | 0.34                       | 63.85   | 0.11  |
|                    | 2                        | 600    | 516.42             | 0.37                       | 63.30   | 0.12  |
|                    | 2                        | 750    | 520.19             | 0.38                       | 63.61   | 0.13  |
|                    | 2                        | 1000   | 533.16             | 0.38                       | 63.39   | 0.13  |
| <b>8OPC@6OBA</b>   | 2                        | 12     | 578.12             | 0.81                       | 70.65   | 0.33  |
|                    | 2                        | 150    | 603.71             | 1.23                       | 72.01   | 0.53  |
|                    | 2                        | 350    | 585.46             | 1.38                       | 71.94   | 0.58  |
|                    | 2                        | 600    | 583.36             | 1.40                       | 72.13   | 0.59  |
|                    | 2                        | 750    | 578.47             | 1.39                       | 72.51   | 0.58  |
|                    | 2                        | 1000   | 585.33             | 1.42                       | 71.73   | 0.59  |
| <b>4OPC@6OBA</b>   | 4                        | 12     | 584.86             | 1.03                       | 70.48   | 0.42  |
|                    | 4                        | 150    | 603.21             | 1.27                       | 69.94   | 0.53  |
|                    | 4                        | 350    | 586.47             | 1.35                       | 71.17   | 0.56  |
|                    | 4                        | 600    | 582.41             | 1.37                       | 71.49   | 0.57  |
|                    | 4                        | 750    | 571.03             | 1.36                       | 72.01   | 0.56  |
|                    | 4                        | 1000   | 593.78             | 1.38                       | 68.76   | 0.56  |
| <b>6OPC@6OBA</b>   | 4                        | 12     | 586.13             | 1.64                       | 71.96   | 0.69  |
|                    | 4                        | 150    | 600.52             | 1.85                       | 72.17   | 0.80  |
|                    | 4                        | 350    | 584.28             | 1.95                       | 72.49   | 0.83  |
|                    | 4                        | 600    | 584.07             | 1.91                       | 72.78   | 0.81  |
|                    | 4                        | 750    | 577.86             | 1.93                       | 72.86   | 0.81  |
|                    | 4                        | 1000   | 595.90             | 1.88                       | 72.64   | 0.81  |
| <b>6OP6C@6OBA</b>  | 4                        | 12     | 559.77             | 0.72                       | 71.81   | 0.29  |

|                    |   |      |        |      |       |      |
|--------------------|---|------|--------|------|-------|------|
|                    | 4 | 150  | 580.51 | 0.96 | 72.80 | 0.40 |
|                    | 4 | 350  | 563.38 | 1.06 | 72.77 | 0.43 |
|                    | 4 | 600  | 560.59 | 1.09 | 73.11 | 0.45 |
|                    | 4 | 750  | 553.34 | 1.11 | 73.28 | 0.45 |
|                    | 4 | 1000 | 567.25 | 1.13 | 73.77 | 0.47 |
| <b>2C6OPC@6OBA</b> | 4 | 12   | 508.28 | 0.24 | 67.19 | 0.08 |
|                    | 4 | 150  | 530.61 | 0.33 | 66.64 | 0.12 |
|                    | 4 | 350  | 517.17 | 0.37 | 66.35 | 0.13 |
|                    | 4 | 600  | 518.85 | 0.39 | 66.39 | 0.13 |
|                    | 4 | 750  | 517.15 | 0.42 | 66.62 | 0.14 |
|                    | 4 | 1000 | 532.20 | 0.43 | 66.95 | 0.15 |
| <b>8OPC@6OBA</b>   | 4 | 12   | 609.95 | 1.50 | 73.29 | 0.67 |
|                    | 4 | 150  | 617.33 | 1.68 | 73.67 | 0.76 |
|                    | 4 | 350  | 603.81 | 1.73 | 73.80 | 0.77 |
|                    | 4 | 600  | 599.20 | 1.70 | 73.65 | 0.75 |
|                    | 4 | 750  | 608.41 | 1.70 | 73.23 | 0.76 |
|                    | 4 | 1000 | 617.09 | 1.57 | 72.77 | 0.70 |
| <b>4OPC@6OBA</b>   | 6 | 12   | 618.29 | 1.53 | 64.57 | 0.61 |
|                    | 6 | 150  | 611.70 | 1.66 | 66.55 | 0.68 |
|                    | 6 | 350  | 607.51 | 1.72 | 67.39 | 0.70 |
|                    | 6 | 600  | 614.82 | 1.71 | 67.51 | 0.71 |
|                    | 6 | 750  | 611.87 | 1.68 | 68.48 | 0.70 |
|                    | 6 | 1000 | 617.05 | 1.66 | 68.27 | 0.70 |
| <b>6OPC@6OBA</b>   | 6 | 12   | 612.96 | 1.64 | 68.00 | 0.68 |
|                    | 6 | 150  | 620.88 | 1.86 | 69.03 | 0.80 |
|                    | 6 | 350  | 611.43 | 1.89 | 70.11 | 0.81 |
|                    | 6 | 600  | 607.98 | 1.88 | 70.83 | 0.81 |
|                    | 6 | 750  | 608.63 | 1.87 | 71.28 | 0.81 |
|                    | 6 | 1000 | 628.49 | 1.83 | 71.51 | 0.82 |
| <b>6OP6C@6OBA</b>  | 6 | 12   | 603.50 | 1.06 | 71.16 | 0.46 |
|                    | 6 | 150  | 606.21 | 1.20 | 71.62 | 0.52 |
|                    | 6 | 350  | 584.17 | 1.20 | 71.74 | 0.50 |
|                    | 6 | 600  | 590.52 | 1.18 | 72.03 | 0.50 |
|                    | 6 | 750  | 559.58 | 1.18 | 71.99 | 0.48 |
|                    | 6 | 1000 | 597.99 | 1.17 | 72.32 | 0.51 |
| <b>2C6OPC@6OBA</b> | 6 | 12   | 459.81 | 0.14 | 52.49 | 0.03 |
|                    | 6 | 150  | 496.18 | 0.18 | 55.56 | 0.05 |
|                    | 6 | 350  | 346.41 | 0.19 | 40.77 | 0.03 |
|                    | 6 | 600  | 266.31 | 0.19 | 37.54 | 0.02 |
|                    | 6 | 750  | 253.95 | 0.20 | 36.77 | 0.02 |
|                    | 6 | 1000 | 280.78 | 0.20 | 38.34 | 0.02 |
| <b>8OPC@6OBA</b>   | 6 | 12   | 624.91 | 1.80 | 65.25 | 0.73 |
|                    | 6 | 150  | 634.27 | 1.63 | 71.12 | 0.73 |
|                    | 6 | 350  | 629.06 | 1.65 | 70.79 | 0.73 |
|                    | 6 | 600  | 632.78 | 1.61 | 70.90 | 0.72 |
|                    | 6 | 750  | 635.42 | 1.59 | 71.08 | 0.72 |
|                    | 6 | 1000 | 646.08 | 1.55 | 70.98 | 0.71 |
| <b>4OPC@6OBA</b>   | 8 | 12   | 625.06 | 1.67 | 67.52 | 0.71 |
|                    | 8 | 150  | 629.46 | 1.73 | 67.80 | 0.74 |



|                    |   |      |        |      |       |      |
|--------------------|---|------|--------|------|-------|------|
|                    | 8 | 350  | 608.56 | 1.85 | 63.68 | 0.72 |
|                    | 8 | 600  | 618.25 | 1.63 | 64.32 | 0.65 |
|                    | 8 | 750  | 612.13 | 1.61 | 65.15 | 0.64 |
|                    | 8 | 1000 | 620.03 | 1.55 | 66.54 | 0.64 |
| <b>6OPC@6OBA</b>   | 8 | 12   | 632.38 | 1.71 | 66.72 | 0.72 |
|                    | 8 | 150  | 647.09 | 1.91 | 67.61 | 0.84 |
|                    | 8 | 350  | 632.65 | 1.93 | 69.49 | 0.85 |
|                    | 8 | 600  | 637.86 | 1.88 | 70.04 | 0.84 |
|                    | 8 | 750  | 624.28 | 1.88 | 71.62 | 0.84 |
|                    | 8 | 1000 | 635.49 | 1.86 | 71.70 | 0.85 |
| <b>6OP6C@6OBA</b>  | 8 | 12   | 625.98 | 1.14 | 71.36 | 0.51 |
|                    | 8 | 150  | 634.22 | 1.29 | 72.47 | 0.59 |
|                    | 8 | 350  | 616.57 | 1.28 | 71.95 | 0.57 |
|                    | 8 | 600  | 615.99 | 1.28 | 72.12 | 0.57 |
|                    | 8 | 750  | 580.01 | 1.35 | 72.02 | 0.56 |
|                    | 8 | 1000 | 622.32 | 1.30 | 72.58 | 0.59 |
| <b>2C6OPC@6OBA</b> | 8 | 12   | 408.57 | 0.13 | 56.58 | 0.03 |
|                    | 8 | 150  | 448.34 | 0.15 | 56.96 | 0.04 |
|                    | 8 | 350  | 447.42 | 0.15 | 56.47 | 0.04 |
|                    | 8 | 600  | 459.45 | 0.15 | 56.01 | 0.04 |
|                    | 8 | 750  | 463.56 | 0.17 | 52.32 | 0.04 |
|                    | 8 | 1000 | 486.48 | 0.16 | 56.00 | 0.04 |
| <b>8OPC@6OBA</b>   | 8 | 12   | 633.17 | 1.79 | 70.06 | 0.79 |
|                    | 8 | 150  | 629.68 | 1.95 | 69.21 | 0.85 |
|                    | 8 | 350  | 608.25 | 1.96 | 67.74 | 0.81 |
|                    | 8 | 600  | 605.89 | 1.93 | 67.27 | 0.79 |
|                    | 8 | 750  | 611.32 | 1.97 | 67.62 | 0.82 |
|                    | 8 | 1000 | 622.17 | 1.90 | 67.58 | 0.80 |

---
